# Supplementary material for: Differently Pre-treated Alfalfa Silages Affect the in vitro Ruminal Microbiota Composition
Source: Front Microbiol. 2019 Dec 3;10:2761. doi: 10.3389/fmicb.2019.02761 (PMC6902091; doi:10.3389/fmicb.2019.02761)
Supplement: Supplementary file 2 [file Data_Sheet_2.xlsx]

## Sheet: Liquid_phase_ET
Supplementary Table S2.
a) All genera present in the liquid phase at the early time point
Treatments include different: dry matter (DM) concentrations, i.e. 25 or 35; wilting intensities (WI), i.e. low (LI) or high (HI); and sucrose addition (SA)
Domain	Phylum	Class	Order	Family	Genus	25HISA_a	25HISA_b	25HISA_c	25HISA_d	25HI_a	25HI_b	25HI_c	25HI_d	25LISA_a	25LISA_b	25LISA_c	25LISA_d	25LI_a	25LI_b	25LI_c	25LI_d	35HISA_a	35LISA_b	35HISA_c	35HISA_d	35HI_a	35HI_b	35HI_c	35HI_d	35LISA_a	35LISA_b	35LISA_c	35LISA_d	35LI_a	35LI_b	35LI_c	35LI_d
Archaea	Euryarchaeota	Methanomicrobia	Methanomicrobiales	Methanomicrobiaceae	Methanomicrobium	0.00182092	0.00169027	0.00295494	0	0.00191431	0.00144718	0	0.00172069	0.0066171	0.00135402	0	0	0.00114267	0.00227475	0	0	0.00381859	0.00200399	0.0024555	0.00225799	0.00190172	0.00191924	0.00190872	0	0	0.00212575	0	0.00118885	0.00158805	0.00316312	0.00263866	0
Archaea	Euryarchaeota	Methanobacteria	Methanobacteriales	Methanobacteriaceae	Methanosphaera	0	0	0	0	0	0	0	0	0	0	0	0	0	0	0	0	0	0	0	0	0	0	0	0	0	0	0	0	0	0	0	0
Archaea	Euryarchaeota	Methanobacteria	Methanobacteriales	Methanobacteriaceae	Methanobrevibacter	0	0	0	0	0	0	0	0	0	0	0.00249023	0	0	0	0	0	0	0	0	0	0	0	0	0	0	0	0	0	0	0	0	0
Archaea	Euryarchaeota	Thermoplasmata	Thermoplasmatales	Thermoplasmatales_Incertae_Sedis	Candidatus_Methanomethylophilus	0	0	0	0	0	0	0	0	0	0	0	0	0	0	0	0	0	0	0	0	0	0	0	0	0	0	0	0	0	0	0	0
Archaea	Euryarchaeota	Thermoplasmata	Thermoplasmatales	Thermoplasmatales_Incertae_Sedis	uncultured	0.00411277	0.00156025	0.00324115	0.00125158	0	0.0019939	0.00451175	0.027706	0.00206938	0	0.004959	0.00414424	0.00209698	0.00410084	0	0.0103646	0.00476345	0.00205311	0.00575319	0.00606351	0	0.00667048	0	0.00109216	0.0211175	0	0.00111359	0.0218126	0.00745902	0	0.0160677	0.00403221
Bacteria	Bacteroidetes	Bacteroidia	Bacteroidales	Prevotellaceae	Unknown_Genus	0.0110556	0.00461834	0.00168633	0.00260624	0.00334828	0.00227128	0.00276582	0.0017299	0.0178801	0.0114636	0.00170667	0.00614283	0.00820794	0.00274701	0.00512931	0.00200396	0.0408863	0.0108893	0.0043313	0.00533195	0.00562927	0.00618697	0.00680908	0.00109216	0.00485545	0.00682533	0.00123368	0.00308087	0.0085466	0.00503551	0.00375648	0.00134785
Bacteria	Bacteroidetes	Bacteroidia	Bacteroidales	Prevotellaceae	Prevotella_1	0.099007	0.149935	0.150416	0.0530966	0.0660968	0.083812	0.143356	0.0762719	0.059374	0.0489659	0.0821562	0.0419096	0.0988552	0.178202	0.0414655	0.0700957	0.169908	0.159995	0.180772	0.132384	0.0931083	0.143928	0.0542699	0.0718939	0.0792423	0.07127	0.0765426	0.0414214	0.0995178	0.0990594	0.0913647	0.0743354
Bacteria	Bacteroidetes	Bacteroidia	Bacteroidales	Prevotellaceae	Prevotella_7	0	0.0454084	0.0238174	0.0953117	0.0349239	0.0491399	0	0.0423733	0.00175856	0.069504	0.0541089	0.235426	0.00254065	0.031571	0.00465517	0.0277107	0	0	0.0714883	0.0895035	0	0.00848118	0.0275231	0.0351498	0.0439886	0.188968	0.160291	0.132615	0.0159479	0.0124808	0.0127599	0.0204669
Bacteria	Bacteroidetes	Bacteroidia	Bacteroidales	Prevotellaceae	Prevotellaceae_YAB2003_group	0.0777614	0.0596691	0.0353665	0.0247961	0.0147777	0.0205058	0.00708742	0.0184952	0.0475793	0.0315525	0.024591	0.0202627	0.0203252	0.020032	0.00525862	0.0118083	0.0995907	0.121688	0.0516037	0.0889126	0.0267236	0.0146386	0.00951392	0.00822255	0.0304396	0.0343559	0.0226866	0.0212471	0.01333	0.0144473	0.0214895	0.00874401
Bacteria	Bacteroidetes	Bacteroidia	Bacteroidales	Prevotellaceae	Prevotella_9	0	0	0	0	0	0	0	0	0	0	0	0	0	0	0	0	0	0	0	0.00270818	0	0	0	0	0	0	0	0	0	0	0	0
Bacteria	Bacteroidetes	Bacteroidia	Bacteroidales	Porphyromonadaceae	uncultured	0	0	0	0	0	0	0	0	0	0	0	0	0	0	0	0	0	0	0	0	0	0	0	0	0	0	0	0	0	0	0	0
Bacteria	Bacteroidetes	Bacteroidia	Bacteroidales	Bacteroidales_S24-7_group	Unknown_Genus	0	0	0	0	0	0	0	0	0	0	0	0	0	0	0	0	0	0	0	0	0	0	0	0	0	0	0	0	0	0	0	0
Bacteria	Bacteroidetes	Bacteroidia	Bacteroidales	Bacteroidales_BS11_gut_group	uncultured_rumen_bacterium	0.0100734	0.0239394	0.0332237	0.0167123	0.163409	0.0448748	0.0184791	0.00977208	0.0226486	0.125963	0.0338006	0.0155128	0.0175585	0.0397333	0.16208	0.0364161	0.0186065	0.0168227	0.0459052	0.00632377	0.00948962	0.0281473	0.237883	0.0435481	0	0.0951222	0.0281344	0.0121713	0.0276609	0.221186	0.0199078	0.0155625
Bacteria	Bacteroidetes	Bacteroidia	Bacteroidales	Rikenellaceae	Unknown_Genus	0	0	0	0	0	0	0	0	0	0	0	0	0	0	0	0	0	0	0	0	0	0	0	0	0	0	0	0	0	0	0	0
Bacteria	Bacteroidetes	Bacteroidia	Bacteroidales	Bacteroidales_BS11_gut_group	Unknown_Genus	0.029673	0.123749	0.100089	0.0297288	0.0503938	0.1595	0.0563882	0.044048	0.0257486	0.0292611	0.0434395	0.0304373	0.0471297	0.0732327	0.0536961	0.0626401	0.0422281	0.0246274	0.120172	0.295184	0.0333725	0.131816	0.0459675	0.0418283	0.22139	0.0226955	0.0270754	0.0393119	0.15405	0.051668	0.252049	0.0326315
Bacteria	Bacteroidetes	Bacteroidia	Bacteroidales	Bacteroidales_BS11_gut_group	uncultured_bacterium	0.00870544	0.0118527	0.00884935	0.00995376	0.00415357	0.0258443	0.0125499	0.0237769	0.00786854	0.00274058	0.0114529	0.00711183	0.00205931	0.0180248	0.00354526	0.0128211	0.0114837	0.00758863	0.0127095	0	0.00290712	0.0249995	0.00333778	0.00957833	0.00130692	0.00270929	0.00820997	0.0122945	0.0158516	0.0037891	0.00738369	0.0254505
Bacteria	Bacteroidetes	Bacteroidia	Bacteroidales	Marinilabiaceae	uncultured	0	0	0	0	0	0	0	0	0	0	0	0	0	0	0	0	0	0	0	0	0	0	0	0	0	0	0	0	0	0	0	0
Bacteria	Bacteroidetes	Bacteroidetes_BD2-2	Unknown_Order	Unknown_Family	Unknown_Genus	0	0	0	0	0	0	0	0	0	0	0	0	0	0	0	0	0	0	0	0	0	0	0	0	0	0	0	0	0	0	0	0
Bacteria	Bacteroidetes	Bacteroidia	Bacteroidales	PeH15	uncultured_rumen_bacterium	0	0.00203353	0.00272288	0	0.00148342	0.00567216	0	0	0	0	0	0	0	0.00325864	0	0	0	0	0.00133986	0	0	0.00449962	0.00161203	0	0	0	0	0	0.00592872	0.00122426	0.0012699	0
Bacteria	Bacteroidetes	Bacteroidia	Bacteroidales	Bacteroidales_S24-7_group	uncultured_bacterium	0.00627904	0	0	0.00182584	0.00216155	0	0.00210894	0.00773853	0.00441685	0.00259737	0	0.00182554	0.00517757	0	0.00161638	0	0.00235377	0.00269163	0	0.00190628	0.00262731	0	0.00219552	0.00274922	0.00507879	0.00387116	0.00139744	0.00341433	0	0.00291938	0	0
Bacteria	Bacteroidetes	Bacteroidia	Bacteroidales	Bacteroidales_S24-7_group	uncultured_rumen_bacterium	0	0	0	0	0	0	0	0	0	0	0	0	0	0	0	0	0	0	0	0	0	0	0	0	0	0	0	0	0	0	0	0
Bacteria	Bacteroidetes	Bacteroidia	Bacteroidales	Rikenellaceae	SP3-e08	0	0	0	0.00896722	0.00487409	0	0.00397587	0.00353341	0	0.00747964	0.00481946	0.0109965	0	0	0.00256465	0	0	0	0	0	0	0	0.00373337	0.00638974	0	0.00385553	0.00917071	0.0112289	0	0.00219369	0	0.00440599
Bacteria	Bacteroidetes	Bacteroidia	Bacteroidales	Rikenellaceae	Rikenellaceae_RC9_gut_group	0.208966	0.158573	0.168695	0.391937	0.303309	0.145237	0.267213	0.343523	0.138108	0.315701	0.279411	0.329498	0.221832	0.131392	0.337791	0.346751	0.150183	0.16024	0.116781	0.0761666	0.168342	0.156978	0.268407	0.416174	0.13764	0.190099	0.2832	0.433265	0.140422	0.228005	0.160054	0.393911
Bacteria	Bacteroidetes	Bacteroidia	Bacteroidales	Prevotellaceae	Prevotellaceae_UCG-001	0.00323819	0.011395	0.0115954	0.00385782	0	0.00634349	0.00859133	0.0100021	0	0.00169252	0.00128805	0.0060044	0.00474646	0.00929577	0	0.00359852	0	0.00324175	0.0120095	0.00677396	0	0.0256113	0.00490531	0.00655293	0.0102237	0.00351166	0.0012446	0.00763331	0.0124542	0.00513522	0.00568795	0.00297885
Bacteria	Bacteroidetes	Bacteroidia	Bacteroidales	Prevotellaceae	Prevotellaceae_Ga6A1_group	0.0246991	0.01243	0.00774318	0.00630209	0.00299509	0.0037868	0.00321527	0.00631228	0.0167922	0.00822175	0.0111953	0.00459414	0.0312036	0.00455737	0.0106142	0.00359852	0.0180586	0.0316758	0.0069618	0.00662624	0.0287771	0.00316256	0.00430698	0.00371584	0.00921461	0.00609591	0.00669243	0.00263868	0.00406156	0.00524047	0.00437242	0.00587842
Bacteria	Bacteroidetes	Bacteroidia	Bacteroidales	Prevotellaceae	Prevotellaceae_UCG-004	0	0.00273564	0.00814543	0	0	0.00734044	0.00197065	0.00181271	0	0	0.00210382	0	0.0027876	0.0125938	0	0.00211171	0	0	0.00578054	0.0020962	0.00310156	0.0061179	0	0.00168217	0.00434261	0	0.00172497	0	0.00757452	0.00185023	0.0118854	0.00335263
Bacteria	Bacteroidetes	Bacteroidia	Bacteroidales	Bacteroidales_Incertae_Sedis	Phocaeicola	0	0	0	0	0	0	0	0	0	0	0	0	0	0	0	0	0	0	0	0	0	0	0	0	0	0	0	0	0	0	0	0
Bacteria	Bacteroidetes	Bacteroidia	Bacteroidales	Bacteroidales_UCG-001	Unknown_Genus	0.00169086	0	0.0017018	0	0.00149048	0.00164014	0	0.00181271	0	0	0.00194281	0	0	0	0	0.00237028	0.00149836	0	0.00191955	0	0	0.00137159	0	0	0	0	0	0.00184127	0	0.00172282	0.00491993	0.00226529
Bacteria	Bacteroidetes	Bacteroidia	Bacteroidales	Bacteroidales_UCG-001	uncultured_rumen_bacterium	0	0	0	0	0	0	0	0	0	0	0	0	0	0	0	0.00185313	0	0	0	0	0	0	0	0	0	0	0	0	0	0	0	0
Bacteria	Bacteroidetes	Bacteroidia	Bacteroidales	Prevotellaceae	Prevotellaceae_UCG-003	0.0180792	0.0131373	0.0174744	0.00952675	0.0036379	0.00531036	0.0126709	0.00969846	0.0239246	0.0166844	0.0145764	0.0103303	0.0063035	0.00844569	0.00422414	0.00721858	0.0256007	0.0195291	0.0203112	0.0199913	0.00675797	0.00650273	0.0043317	0.00399202	0.0279499	0.0161516	0.0139962	0.0181155	0.00881608	0.00456464	0.0127523	0.00615026
Bacteria	Bacteroidetes	Bacteroidia	Bacteroidales	Bacteroidales_RF16_group	Unknown_Genus	0.00118405	0	0	0	0	0	0	0.00215317	0	0	0	0	0	0.0017159	0	0	0	0	0	0	0	0.00114957	0	0	0	0	0	0	0	0	0	0
Bacteria	Bacteroidetes	Bacteroidia	Bacteroidales	Porphyromonadaceae	Unknown_Genus	0.00258338	0.00384861	0.00635854	0.00226757	0.00519196	0.00791931	0.00949022	0.0124037	0	0.00361939	0.00627925	0.00193802	0.00288806	0.00741458	0.00927802	0.00405103	0.00215809	0.00315825	0.00889229	0	0.0043915	0.0053729	0.00461356	0.0026739	0	0.00355855	0.0049238	0.00234146	0.00625595	0.00772776	0.00704911	0.00969543
Bacteria	Bacteroidetes	Bacteroidia	Bacteroidales	Unknown_Family	Unknown_Genus	0	0	0.00129182	0.00129576	0	0	0	0.00956044	0.00144775	0	0	0.0018688	0	0	0	0	0	0	0	0	0	0.00142586	0	0.00140599	0	0.0011254	0	0.00774205	0.00159768	0	0.0014448	0
Bacteria	Spirochaetae	Spirochaetes	Spirochaetales	Spirochaetaceae	Unknown_Genus	0	0	0	0	0	0	0	0	0	0	0	0	0	0	0	0	0	0	0	0.00122396	0	0	0	0	0	0	0	0	0	0	0.00133074	0.00227661
Bacteria	Spirochaetae	Spirochaetes	Spirochaetales	Spirochaetaceae	Treponema_2	0.0668	0.0400672	0.0529027	0.0524045	0.0272878	0.0364891	0.0385313	0.0329785	0.0280225	0.0345274	0.0521231	0.0474209	0.0475608	0.0395759	0.0327263	0.0297147	0.043486	0.0556254	0.0433185	0.0328639	0.0895135	0.0333228	0.0233991	0.044816	0.0500682	0.0307505	0.0503952	0.0367022	0.029865	0.0329053	0.0362341	0.0610948
Bacteria	SR1_(Absconditabacteria)	uncultured_bacterium	Unknown_Order	Unknown_Family	Unknown_Genus	0	0	0	0	0	0	0	0	0	0	0	0	0	0.00170016	0	0	0	0	0	0	0	0.00102623	0	0	0	0	0	0	0.00425405	0	0.00117105	0
Bacteria	SR1_(Absconditabacteria)	uncultured_rumen_bacterium	Unknown_Order	Unknown_Family	Unknown_Genus	0	0	0	0	0	0	0	0.00340458	0	0	0	0	0	0	0	0	0	0	0	0	0	0	0	0	0	0	0	0	0	0	0	0
Bacteria	Cyanobacteria	Melainabacteria	Gastranaerophilales	uncultured_bacterium	Unknown_Genus	0	0	0	0.0015608	0	0	0.00503034	0	0	0	0.00278004	0	0	0	0	0.0021979	0	0	0	0	0	0	0	0.00092896	0	0	0.00163763	0.00486415	0	0	0	0.00437201
Bacteria	Chloroflexi	Anaerolineae	Anaerolineales	Anaerolineaceae	uncultured	0.00148006	0	0.00107523	0	0	0	0	0	0.00125962	0.00139307	0	0	0.00117615	0.00146403	0.00125	0	0	0	0	0	0	0.000962089	0.00188894	0	0.00162124	0.00170894	0	0	0.00198266	0	0	0
Bacteria	Elusimicrobia	Elusimicrobia	Lineage_I	Unknown_Family	Candidatus_Endomicrobium	0	0	0	0	0	0	0	0	0	0	0.00099824	0	0	0	0	0	0.00116291	0	0	0	0	0	0	0	0	0	0	0	0	0	0	0
Bacteria	Elusimicrobia	Elusimicrobia	Lineage_IV	uncultured_bacterium	Unknown_Genus	0	0	0	0	0	0	0	0	0	0	0	0	0	0	0	0	0	0	0	0	0	0	0	0	0	0	0	0	0	0	0	0
Bacteria	Elusimicrobia	Elusimicrobia	Lineage_IV	uncultured_bacterium	Unknown_Genus	0.00111677	0	0	0	0	0	0	0	0.000883371	0	0	0	0	0	0	0	0.00245441	0.00169946	0	0.00159677	0	0	0	0	0	0	0	0.00146432	0	0	0	0
Bacteria	Planctomycetes	Planctomycetacia	Planctomycetales	Planctomycetaceae	CPla-4_termite_group	0	0.000925748	0.00141559	0	0	0	0	0.00109499	0	0	0	0	0	0.00110195	0	0	0	0	0	0	0	0	0	0	0.00201001	0	0	0	0.000962455	0	0.00245616	0
Bacteria	Planctomycetes	Planctomycetacia	Planctomycetales	Planctomycetaceae	p-1088-a5_gut_group	0	0	0	0	0	0	0	0	0	0	0	0	0	0	0	0	0	0	0	0	0	0	0	0	0	0	0	0	0	0	0	0
Bacteria	Lentisphaerae	Oligosphaeria	Oligosphaerales	Oligosphaeraceae	horsej-a03	0	0	0	0	0	0	0	0	0	0	0	0	0	0	0	0	0	0	0	0.00107624	0	0	0	0	0	0	0	0	0	0.00142368	0	0
Bacteria	Firmicutes	Erysipelotrichia	Erysipelotrichales	Erysipelotrichaceae	Kandleria	0.00522506	0	0	0.00375475	0	0	0.00245467	0	0.00463769	0	0.00181401	0.00166116	0.00183747	0	0	0.00601189	0.00382418	0.00109532	0	0	0.00225266	0	0	0.00274922	0	0	0.00387572	0.0048569	0	0	0	0.0033413
Bacteria	Firmicutes	Erysipelotrichia	Erysipelotrichales	Erysipelotrichaceae	Erysipelotrichaceae_UCG-002	0	0	0	0	0	0	0	0	0	0	0	0	0	0	0	0	0	0	0	0	0	0	0	0	0	0	0	0	0	0	0	0
Bacteria	Firmicutes	Clostridia	Halanaerobiales	ODP1230B8.23	Unknown_Genus	0	0	0	0	0	0	0	0	0	0	0	0	0	0	0	0	0	0	0	0	0	0	0	0	0	0	0	0	0	0	0	0
Bacteria	Fibrobacteres	Fibrobacteria	Fibrobacterales	Fibrobacteraceae	Fibrobacter	0	0.00108177	0	0	0	0	0.000950751	0.00144465	0	0	0.00104118	0	0	0.00109408	0	0	0.00150954	0.0013802	0.00241722	0.00114658	0	0.00120878	0	0	0.00138964	0	0.00135377	0	0	0	0.00132313	0.00106468
Bacteria	Verrucomicrobia	Opitutae	Opitutae_vadinHA64	uncultured_bacterium	Unknown_Genus	0	0	0	0	0	0	0	0	0	0	0	0	0	0	0	0	0	0	0	0	0	0	0	0	0	0	0	0	0	0	0	0
Bacteria	Proteobacteria	Epsilonproteobacteria	Campylobacterales	Campylobacteraceae	Campylobacter	0	0	0.00269194	0.0022234	0	0	0	0.00154586	0	0.00112618	0.00140612	0.00299355	0	0	0	0.000948112	0	0	0.000869541	0.00185	0	0	0	0	0.00214235	0.00460059	0.00259837	0.00710413	0	0	0	0
Bacteria	Synergistetes	Synergistia	Synergistales	Synergistaceae	Synergistes	0	0	0	0	0	0	0	0	0	0	0	0	0	0	0	0	0	0	0	0	0	0	0	0	0	0	0	0	0	0	0	0
Bacteria	Proteobacteria	Gammaproteobacteria	Aeromonadales	Succinivibrionaceae	Anaerobiospirillum	0	0	0	0	0	0	0	0	0	0	0	0	0	0	0	0	0	0	0	0	0	0	0	0	0	0	0	0	0	0	0	0
Bacteria	Proteobacteria	Gammaproteobacteria	Aeromonadales	Succinivibrionaceae	Succinivibrio	0.00435048	0.00387982	0.0526088	0.00278293	0.0207961	0.00558774	0.0122733	0.00402109	0.01222	0.0249647	0.00975699	0	0.00676391	0.00380174	0.051972	0.00211171	0.00531136	0.00892462	0.00411802	0.0359027	0.00459068	0.00349312	0.0298769	0.00254836	0.0338393	0.0444637	0.00614656	0	0.00378245	0.0216377	0.0272991	0.00877799
Bacteria	Firmicutes	Clostridia	Clostridiales	Lachnospiraceae	Oribacterium	0.010477	0.00966314	0.00721717	0.00477074	0.00355314	0.00862682	0.00454632	0.00439835	0.0238755	0.00393186	0.00458332	0.00231005	0.00853023	0.00566719	0.00425647	0.0075418	0.0104774	0.0121222	0.00690164	0.0044386	0.0130986	0.00588108	0.00463828	0.00546078	0.0106621	0.00827376	0.006485	0.00387102	0.0096438	0.00468097	0.00352836	0.00343191
Bacteria	Firmicutes	Clostridia	Clostridiales	Lachnospiraceae	Lachnospiraceae_NK4A136_group	0.0128855	0.00967875	0.00368207	0.00653768	0.0109278	0.015304	0.0114954	0.00790416	0.0160152	0.010409	0.0126336	0.00791646	0.0166586	0.0110668	0.0125754	0.0135752	0.0098344	0.00361013	0.00450083	0.00113955	0.0178648	0.0140218	0.0129012	0.00836064	0.00757682	0.00529354	0.00607013	0.00212399	0.014254	0.0113673	0.00705671	0.00941227
Bacteria	Firmicutes	Clostridia	Clostridiales	Lachnospiraceae	Lachnospiraceae_UCG-009	0	0	0	0	0	0	0.0011409	0.00330337	0	0	0	0	0	0	0	0	0	0	0	0	0.00119984	0	0	0	0	0	0	0	0	0	0	0
Bacteria	Firmicutes	Clostridia	Clostridiales	Lachnospiraceae	Lachnospiraceae_FCS020_group	0.0017985	0.00349496	0	0	0	0.00281799	0	0	0.00319813	0	0	0	0.00150263	0	0	0	0.00160459	0.00219063	0	0	0.00164088	0	0	0	0	0	0	0	0.00186716	0	0.0043344	0
Bacteria	Firmicutes	Clostridia	Clostridiales	Lachnospiraceae	Unknown_Genus	0.0148768	0.0093927	0.00206536	0.00820155	0.00867446	0.0155813	0.0253591	0.00505167	0.0357193	0.00501898	0.0102507	0.00566697	0.0285164	0.0154903	0.00657328	0.0168505	0.00987913	0.00721043	0.0066118	0.00174449	0.0227352	0.0130696	0.00328833	0.00564908	0.00553373	0.0039441	0.00518582	0.00154406	0.0148699	0.00674725	0.005764	0.00813238
Bacteria	Firmicutes	Clostridia	Clostridiales	Lachnospiraceae	[Eubacterium]_cellulosolvens_group	0	0	0	0	0	0	0	0	0	0	0	0	0	0	0	0	0	0	0	0	0	0	0	0	0	0	0	0	0	0	0	0
Bacteria	Firmicutes	Clostridia	Clostridiales	Lachnospiraceae	Syntrophococcus	0	0	0	0	0	0	0	0	0	0	0	0	0	0	0	0	0	0	0	0	0	0	0	0	0	0	0	0	0	0	0	0
Bacteria	Firmicutes	Clostridia	Clostridiales	Lachnospiraceae	Coprococcus_1	0	0	0	0	0	0	0	0	0	0	0	0	0	0	0	0	0	0	0	0	0	0	0	0	0	0	0	0	0	0	0	0
Bacteria	Firmicutes	Clostridia	Clostridiales	Lachnospiraceae	Roseburia	0.0234432	0.0147027	0.00692323	0.00842242	0.00977643	0.0136156	0.00776159	0.00473881	0.0434733	0.0103114	0.0205766	0.00840096	0.0192495	0.00883138	0.00294181	0.0118083	0.0138598	0.0118962	0.0061907	0.00460039	0.0282744	0.00596988	0.00613163	0.00767019	0.00955375	0.00512161	0.00748941	0.0016238	0.00770926	0.00443723	0.0077563	0.0146677
Bacteria	Firmicutes	Clostridia	Clostridiales	Lachnospiraceae	Pseudobutyrivibrio	0.0257934	0.0266959	0.0096229	0.0120299	0.00827888	0.0150065	0.0086259	0.00600863	0.045469	0.0113985	0.0168091	0.0104601	0.0194337	0.010626	0.00489224	0.0171738	0.0266574	0.0250253	0.014826	0.00771655	0.0417477	0.0112786	0.0065025	0.0106956	0.0137227	0.0071171	0.00826455	0.00632847	0.013638	0.00627638	0.010182	0.0134105
Bacteria	Firmicutes	Clostridia	Clostridiales	Lachnospiraceae	[Eubacterium]_oxidoreducens_group	0.00518469	0.00468595	0.00455618	0.00786289	0.00984	0.00437773	0.0117375	0.00130662	0.00936536	0.0096018	0.0117105	0.00523438	0.00498922	0.00326651	0.00897629	0.0101491	0.00362291	0.00473	0.00503131	0.00372814	0.00768275	0.00303921	0.00655195	0.00726848	0.00595558	0.00781006	0.00857024	0.00498739	0.00436954	0.00841467	0.00535337	0.0148829
Bacteria	Firmicutes	Clostridia	Clostridiales	Lachnospiraceae	uncultured	0.00548968	0.0043895	0	0.00229702	0.00169533	0.00365414	0.00252381	0.00153666	0.0131197	0.00177715	0.00484093	0	0.00595191	0	0.00159483	0.00321065	0.00395277	0.00516224	0.00123048	0	0.0080906	0.00152454	0.00278396	0.0021592	0.00360643	0.00104725	0.00250011	0	0.00418668	0.00260362	0.00189345	0.00347722
Bacteria	Firmicutes	Clostridia	Clostridiales	Lachnospiraceae	Lachnospiraceae_UCG-001	0	0	0	0	0	0	0	0	0	0	0	0	0	0.00164506	0	0	0	0	0	0	0.000995912	0	0	0	0	0	0	0	0	0	0	0
Bacteria	Firmicutes	Clostridia	Clostridiales	Lachnospiraceae	Anaerostipes	0	0	0	0	0	0	0	0	0	0	0	0	0	0	0	0	0	0	0	0	0	0	0	0	0	0	0	0	0	0	0	0
Bacteria	Firmicutes	Clostridia	Clostridiales	Lachnospiraceae	Coprococcus_2	0	0	0	0	0	0	0	0	0	0	0	0	0	0	0	0	0	0	0	0	0.00114293	0	0	0	0	0	0	0	0	0	0	0
Bacteria	Firmicutes	Clostridia	Clostridiales	Lachnospiraceae	[Eubacterium]_ruminantium_group	0.00183438	0	0.014063	0.00114851	0.00501536	0.00144718	0.0103545	0.00566817	0.00513664	0.00215471	0.00939204	0.00500943	0.00545382	0.0026683	0.00163793	0.00857611	0	0.00131143	0	0.00418537	0.0052072	0.00115944	0.00578055	0.00136833	0.0211258	0.00451202	0	0	0.00307023	0.0115667	0.0121135	0.0109866
Bacteria	Firmicutes	Clostridia	Clostridiales	Lachnospiraceae	Lachnoclostridium_10	0	0	0	0	0	0	0	0	0	0	0	0	0	0	0	0	0	0	0	0	0	0	0	0	0	0	0	0	0	0	0	0
Bacteria	Firmicutes	Clostridia	Clostridiales	Lachnospiraceae	Lachnospiraceae_UCG-006	0	0	0	0	0	0	0	0	0	0	0	0	0	0	0	0	0	0	0	0	0	0	0	0	0	0	0	0	0	0	0	0
Bacteria	Firmicutes	Clostridia	Clostridiales	Lachnospiraceae	[Eubacterium]_ventriosum_group	0.00332789	0.00205953	0	0	0	0	0	0	0.00635536	0	0.00151346	0	0.00305548	0.00155848	0	0.00181003	0.00335454	0.00291266	0	0	0.00315372	0	0	0.00160685	0	0	0	0	0.0010587	0	0	0
Bacteria	Firmicutes	Clostridia	Clostridiales	Lachnospiraceae	[Bacteroides]_pectinophilus_group	0	0	0	0	0	0	0	0	0	0	0	0	0	0	0	0	0	0	0	0	0	0	0	0	0	0	0	0	0	0	0	0
Bacteria	Firmicutes	Clostridia	Clostridiales	Lachnospiraceae	Lachnoclostridium_1	0.00631941	0.00868018	0.00623477	0.00571311	0.00723343	0.00995341	0.00539335	0.00363462	0.0196386	0.00675706	0.00624705	0.00333097	0.00789821	0.007328	0.00582974	0.00508533	0.00943185	0.0100936	0.00490553	0.00578214	0.010035	0.00726254	0.00852989	0.00543567	0	0.00886772	0.00622298	0.00431322	0.0120211	0.0113008	0.00530774	0.00463251
Bacteria	Firmicutes	Clostridia	Clostridiales	Lachnospiraceae	Butyrivibrio_2	0.0452001	0.036255	0.0245987	0.0293754	0.0341469	0.0449672	0.0358174	0.0291598	0.0248571	0.0335705	0.0372247	0.0281705	0.0525124	0.0354751	0.0337931	0.0288743	0.0447328	0.0303251	0.0276886	0.0151728	0.0572365	0.0519084	0.0261583	0.0263875	0.00877621	0.0181939	0.0165619	0.0109389	0.0556106	0.0353261	0.029185	0.0315215
Bacteria	Firmicutes	Clostridia	Clostridiales	Lachnospiraceae	[Ruminococcus]_gauvreauii_group	0	0	0	0.00133993	0	0	0	0	0	0	0	0	0	0	0	0	0	0	0	0	0	0	0	0.00153153	0	0	0	0	0	0	0	0
Bacteria	Firmicutes	Clostridia	Clostridiales	Lachnospiraceae	uncultured_bacterium	0	0	0	0	0	0	0	0	0	0	0	0	0	0	0	0	0	0	0	0	0	0	0	0	0	0	0	0	0	0	0	0
Bacteria	Firmicutes	Clostridia	Clostridiales	Lachnospiraceae	Moryella	0	0	0	0	0	0	0	0	0	0	0	0	0	0	0	0	0	0	0	0	0	0	0	0	0	0	0	0	0	0	0	0
Bacteria	Firmicutes	Clostridia	Clostridiales	Lachnospiraceae	Lachnospira	0.00358354	0.0118423	0.0474028	0.00247372	0.00554516	0.042917	0.00627496	0.0277244	0	0	0.00181401	0.00153138	0.018019	0.0565066	0.00393319	0.0026935	0	0.00108549	0.0159744	0.0155175	0.0103527	0.0555693	0.00233892	0.00596292	0.0229373	0	0	0	0.0428966	0.0022934	0.048051	0.00209539
Bacteria	Firmicutes	Clostridia	Clostridiales	Lachnospiraceae	[Eubacterium]_eligens_group	0.00221112	0	0	0.00309215	0	0.00172456	0	0.00899914	0.00255196	0	0	0.00264747	0	0.00174738	0	0.0230779	0	0	0	0	0	0	0	0.00582483	0	0	0	0.000971381	0	0	0	0.00166499
Bacteria	Firmicutes	Clostridia	Clostridiales	Lachnospiraceae	Lachnospiraceae_NK3A20_group	0.00321577	0.00469635	0.00109843	0	0.0011938	0.00447823	0	0.000920158	0.00603637	0.00195291	0.00103044	0	0.0024109	0.00155061	0.00135776	0.00228409	0.00278986	0.00371818	0.00197424	0.00118878	0.00363271	0.00157388	0.00127578	0.00106705	0.00114149	0.00205802	0.000982576	0	0.00273337	0.00119102	0	0
Bacteria	Firmicutes	Clostridia	Clostridiales	Lachnospiraceae	Shuttleworthia	0.00278969	0.00700552	0	0.00132521	0.00173065	0.00444607	0	0.000910956	0.00620813	0	0	0.00109879	0.0043279	0.00437633	0.00216595	0.00224099	0.00379622	0.00490191	0.00277816	0	0.0111637	0.00313789	0	0	0.00202655	0	0	0	0.00412893	0	0.0014448	0
Bacteria	Firmicutes	Clostridia	Clostridiales	Lachnospiraceae	Lachnospiraceae_UCG-008	0	0	0	0	0	0	0	0	0	0	0	0	0	0	0	0	0	0	0	0	0	0	0	0	0	0	0	0	0	0	0	0
Bacteria	Firmicutes	Clostridia	Clostridiales	Lachnospiraceae	probable_genus_10	0.00122441	0.00149784	0	0	0	0	0	0	0	0	0	0	0.00176632	0.00138531	0	0	0.00145923	0.00189593	0	0	0.00127572	0.0021462	0	0	0	0	0	0	0.00433105	0	0	0
Bacteria	Firmicutes	Clostridia	Clostridiales	Unknown_Family	Unknown_Genus	0	0	0	0	0	0	0	0	0	0	0	0	0	0	0	0	0	0	0	0	0	0	0	0	0	0	0	0	0.00161692	0	0	0
Bacteria	Firmicutes	Clostridia	Clostridiales	Lachnospiraceae	Lachnospiraceae_ND3007_group	0	0	0	0	0	0	0	0	0	0	0	0	0	0	0	0	0	0	0	0	0	0	0	0.00129301	0	0	0	0	0	0	0	0
Bacteria	Firmicutes	Clostridia	Clostridiales	Lachnospiraceae	Lachnospiraceae_AC2044_group	0	0	0	0	0	0	0	0	0	0	0	0	0	0	0	0	0	0	0	0	0	0	0	0	0	0	0	0	0	0	0	0
Bacteria	Firmicutes	Clostridia	Clostridiales	Ruminococcaceae	Ruminococcaceae_UCG-014	0.00478104	0	0.00130729	0.00151662	0.00257832	0	0.00295597	0.00125142	0.00179128	0.00190734	0.00387489	0.00110744	0.0066509	0.00129873	0.00224138	0	0.00250472	0.00394412	0.00102267	0	0.00408324	0	0.00195817	0.00140599	0.00162124	0.00438176	0.00283855	0	0.00126082	0.00212721	0	0.00356783
Bacteria	Tenericutes	Unknown_Class	Unknown_Order	Unknown_Family	Unknown_Genus	0	0	0	0	0	0	0	0.00155507	0.00251924	0	0	0	0	0	0	0	0	0	0	0	0	0	0	0	0	0	0	0.0032186	0	0	0	0
Bacteria	Firmicutes	Clostridia	Clostridiales	Ruminococcaceae	Ruminiclostridium_6	0	0	0	0	0	0	0	0	0	0	0	0	0	0	0	0	0	0	0	0	0	0	0	0	0	0	0	0	0	0	0	0
Bacteria	Firmicutes	Clostridia	Clostridiales	Ruminococcaceae	Ruminococcus_2	0	0	0	0	0	0	0	0	0	0	0	0	0	0	0	0.00325375	0	0	0	0	0	0	0	0	0	0	0.00184506	0	0	0	0	0
Bacteria	Firmicutes	Clostridia	Clostridiales	Ruminococcaceae	uncultured	0	0	0	0	0	0	0	0	0	0	0.00122365	0	0	0	0	0	0	0	0	0	0.00792461	0	0	0	0	0	0.00145203	0	0	0	0	0
Bacteria	Firmicutes	Clostridia	Clostridiales	Ruminococcaceae	Ruminococcus_1	0.0132667	0.00554408	0.00461806	0.016727	0.00741002	0.007252	0.0224204	0.00469281	0.0104859	0.00480416	0.00719162	0.0121559	0.0122219	0.00565145	0.00485991	0.0296285	0.00801735	0.00759846	0.00304066	0.00365076	0.0285353	0.00657181	0.00705138	0.0251447	0.00728731	0.00606465	0.00732565	0.00392177	0.00756489	0.00761697	0.00517847	0.0130367
Bacteria	Firmicutes	Clostridia	Clostridiales	Clostridiaceae_1	Clostridium_sensu_stricto_1	0	0	0	0	0	0	0	0	0	0	0	0	0	0	0	0	0	0	0	0	0	0	0	0	0	0	0	0	0	0	0	0
Bacteria	Firmicutes	Clostridia	Clostridiales	Lachnospiraceae	Tyzzerella_3	0	0	0	0	0	0	0	0	0	0	0	0	0	0	0	0	0	0	0	0	0	0	0	0	0	0	0	0	0	0	0	0
Bacteria	Firmicutes	Clostridia	Clostridiales	Lachnospiraceae	[Eubacterium]_hallii_group	0	0	0	0	0	0	0	0	0	0	0	0	0	0	0	0	0	0	0	0	0	0	0	0	0	0	0	0	0	0	0	0
Bacteria	Firmicutes	Clostridia	Clostridiales	Ruminococcaceae	Ruminococcaceae_NK4A214_group	0.00620728	0.00406705	0.00463353	0.00795123	0.00524141	0.00496464	0.0126536	0.0087691	0.0084411	0.00445914	0.00858701	0.00500078	0.00711969	0.00447866	0.00483836	0.0117437	0.00564122	0.00642946	0.00367504	0.0031443	0.00854587	0.00505713	0.00589922	0.00930215	0.00667521	0.00418898	0.00799162	0.00702439	0.00498552	0.00542882	0.00382492	0.00932166
Bacteria	Firmicutes	Negativicutes	Selenomonadales	Veillonellaceae	Selenomonas_1	0.00487523	0.00471715	0.00351189	0.00160497	0	0.00148738	0	0.00168389	0.0110094	0	0	0	0.00225185	0.0013066	0	0.00137907	0.00757008	0.0178885	0.00641492	0.00511388	0.00285495	0.00106076	0	0	0.00978535	0.00228206	0.00227084	0.00202975	0.00173242	0	0	0
Bacteria	Firmicutes	Negativicutes	Selenomonadales	Veillonellaceae	Anaerovibrio	0.00346693	0.00242359	0.00215819	0.00201726	0.00257832	0.0019738	0	0	0.00825297	0.0039579	0.00192134	0	0.00301781	0	0.00211207	0.00142217	0.00249354	0.00497068	0.00208362	0.00189924	0.00332445	0	0.00132028	0	0.00315977	0.00386074	0.00294773	0	0.00163617	0.00113562	0	0
Bacteria	Firmicutes	Clostridia	Clostridiales	Ruminococcaceae	Ethanoligenens	0	0	0	0	0	0	0	0	0	0	0	0	0.000987799	0	0	0	0	0	0	0	0.00102911	0	0	0	0.000984325	0	0	0	0	0	0.00112542	0
Bacteria	Firmicutes	Clostridia	Clostridiales	Ruminococcaceae	[Eubacterium]_coprostanoligenes_group	0.00366427	0.001243	0.00265326	0	0.00202027	0.00145522	0.00203979	0.0017483	0	0.00343712	0.00164226	0	0.0100915	0.00146403	0.00466595	0	0.00140891	0.00364451	0.00200159	0.00168118	0.00658725	0.00315762	0	0	0.00248976	0	0.00370104	0	0.00148218	0.0017062	0.00298846	0.00151774
Bacteria	Firmicutes	Clostridia	Clostridiales	Ruminococcaceae	Ruminococcaceae_UCG-010	0.00950826	0.00497199	0.00447882	0.00353388	0.00370148	0.00709522	0.00886792	0.00478482	0.0126126	0.00139307	0.00777124	0.00366839	0.0105268	0.00464395	0.00403017	0.00702465	0.0116626	0.0128884	0.00456646	0.00819488	0.00900589	0.00484005	0.0056322	0.00195835	0.0139791	0.00599692	0.00518582	0.0028199	0.0031376	0.00648135	0.00735328	0.00463251
Bacteria	Firmicutes	Clostridia	Clostridiales	Clostridiaceae_1	Clostridium_sensu_stricto_15	0	0	0	0	0	0	0	0	0	0	0	0	0	0	0	0	0	0	0	0	0	0	0	0	0	0	0	0	0	0	0	0
Bacteria	Firmicutes	Clostridia	Clostridiales	Ruminococcaceae	Ruminococcaceae_UCG-002	0	0.00130021	0.00191066	0.0116471	0.00623035	0.0013306	0.00720842	0.00898074	0	0.00484321	0.0115925	0.00779533	0	0	0.00609914	0.0096966	0	0.00107076	0	0	0	0.00114957	0.00247243	0.00812212	0.00195211	0.00277702	0.014564	0.0137878	0.00241576	0.00476407	0.00166532	0.0074981
Bacteria	Firmicutes	Clostridia	Clostridiales	Ruminococcaceae	Ruminococcaceae_UCG-013	0	0	0	0.0023412	0	0.00118187	0.000847033	0.00208876	0	0	0.00126658	0	0.0018291	0	0	0.00232718	0	0	0	0	0.00241864	0	0	0.00244793	0.00214235	0	0.00110267	0.00237046	0.000962455	0.00131843	0.00136115	0
Bacteria	Firmicutes	Clostridia	Clostridiales	Ruminococcaceae	Unknown_Genus	0	0	0	0	0.000946562	0	0.00176321	0	0	0.00126288	0	0	0	0	0	0.0010343	0	0	0	0	0.00138479	0	0.00112248	0	0.00134001	0	0.00115726	0	0	0.00103591	0	0
Bacteria	Firmicutes	Clostridia	Clostridiales	Ruminococcaceae	Ruminiclostridium_1	0.00116162	0.00224676	0	0	0	0.00237579	0	0	0	0	0	0	0	0.00137744	0	0	0	0	0.003068	0	0	0.00178603	0	0	0.00131519	0	0	0	0.00104908	0	0.00129272	0
Bacteria	Firmicutes	Clostridia	Clostridiales	Ruminococcaceae	Saccharofermentans	0.00311709	0.00353656	0.00239025	0	0.00178717	0.00509328	0.0022818	0.00338618	0.00753319	0.00138656	0.0016208	0	0.00406002	0.00321141	0.00304957	0	0.001845	0.00329086	0.00315004	0	0.00339084	0.00360167	0.00169114	0	0.00124902	0.00135465	0.00180139	0	0.00373432	0.00147354	0.00151324	0.00108734
Bacteria	Firmicutes	Clostridia	Clostridiales	Ruminococcaceae	Ruminococcaceae_UCG-005	0.00522954	0.0012742	0.00131503	0.00278293	0.0043231	0	0.00283497	0.0040855	0.00743504	0.00406856	0.00226482	0.00288107	0.00451206	0	0.00350215	0.00478366	0.00252709	0.0041013	0	0.00157567	0.0066489	0	0.00465312	0.00366563	0.00275446	0.00443386	0.002118	0.00241395	0	0.00579444	0.00124709	0.00284294
Bacteria	Firmicutes	Clostridia	Clostridiales	Ruminococcaceae	Ruminococcaceae_UCG-004	0	0	0	0	0	0	0	0	0	0	0	0	0	0	0	0	0	0	0	0	0	0	0	0	0	0	0	0	0	0	0	0
Bacteria	Firmicutes	Erysipelotrichia	Erysipelotrichales	Erysipelotrichaceae	Erysipelotrichaceae_UCG-004	0	0	0	0	0	0	0	0	0.00331264	0	0	0	0	0	0	0	0.00276191	0	0.00189221	0.00163194	0	0	0	0	0	0	0	0	0	0	0.00121667	0
Bacteria	Firmicutes	Negativicutes	Selenomonadales	Veillonellaceae	Veillonellaceae_UCG-001	0.00100913	0	0.00122994	0.00108961	0	0	0	0	0.0020203	0.00126939	0.0017496	0.00119396	0	0.00281786	0.00112069	0	0.00103432	0	0.00291488	0.00105513	0	0.00129759	0.00102853	0	0	0.00157868	0.00157212	0	0.00247351	0	0.00123949	0.00209539
Bacteria	Firmicutes	Clostridia	Halanaerobiales	ODP1230B8.23	uncultured_bacterium	0	0	0	0.00107489	0.00141278	0	0.00188422	0	0	0.00173809	0.00403589	0	0	0	0	0.00178849	0	0	0	0	0	0	0	0.00194579	0	0.00237063	0.00352636	0	0	0.00108576	0	0.00284294
Bacteria	Firmicutes	Negativicutes	Selenomonadales	Acidaminococcaceae	Acidaminococcus	0	0	0	0	0	0	0	0	0	0	0	0	0	0	0	0	0	0	0	0	0	0	0	0	0	0	0	0	0	0	0	0
Bacteria	Firmicutes	Negativicutes	Selenomonadales	Acidaminococcaceae	Succiniclasticum	0.0673876	0.0347675	0.0502031	0.0435993	0.0419171	0.0381815	0.0636312	0.0664722	0.0805585	0.0460561	0.0520587	0.0439601	0.0843689	0.0981369	0.0575647	0.0457249	0.0717704	0.0451585	0.0552186	0.0257593	0.0494684	0.0663891	0.0574	0.0484063	0.0432855	0.0559729	0.0539216	0.0395656	0.0829347	0.0294652	0.0470625	0.0585803
Bacteria	Cyanobacteria	Melainabacteria	Gastranaerophilales	Unknown_Family	Unknown_Genus	0	0	0	0	0	0	0.00343999	0	0	0	0	0	0	0	0	0	0	0	0	0	0	0	0	0	0	0	0	0	0	0	0	0
Bacteria	Cyanobacteria	Melainabacteria	Gastranaerophilales	uncultured_rumen_bacterium	Unknown_Genus	0	0	0	0	0	0	0	0	0	0	0	0	0	0	0	0	0.00126354	0	0	0	0	0	0	0	0	0	0	0	0	0	0	0
Bacteria	Armatimonadetes	uncultured	uncultured_organism	Unknown_Family	Unknown_Genus	0	0	0	0	0	0	0	0	0	0	0	0	0	0	0	0	0	0	0	0	0	0	0	0	0	0	0	0	0	0	0	0
Bacteria	Armatimonadetes	uncultured	uncultured_bacterium	Unknown_Family	Unknown_Genus	0	0	0	0	0	0	0	0	0	0	0	0	0.00149426	0	0	0	0	0	0	0	0	0	0	0	0	0	0	0	0	0	0	0
Bacteria	Actinobacteria	Coriobacteriia	Coriobacteriales	Coriobacteriaceae	Olsenella	0	0	0	0	0	0	0	0	0.00183218	0	0	0	0	0	0	0	0	0	0	0	0.00179264	0	0.00156752	0	0	0.00169331	0	0	0	0	0	0
Bacteria	Actinobacteria	Coriobacteriia	Coriobacteriales	Coriobacteriaceae	Senegalimassilia	0	0	0	0	0	0	0	0	0	0	0	0	0	0	0	0	0	0	0	0	0	0	0	0	0	0	0	0	0	0	0	0
Bacteria	Actinobacteria	Coriobacteriia	Coriobacteriales	Coriobacteriaceae	Denitrobacterium	0	0	0	0	0	0	0	0	0	0	0	0	0	0.0017159	0	0	0	0	0	0	0.000929518	0	0.00120655	0	0	0	0	0	0.00179017	0	0.0010798	0.00109866
Bacteria	Lentisphaerae	Lentisphaeria	Victivallales	vadinBE97	uncultured_rumen_bacterium	0.00318437	0.00292807	0	0	0	0.00292653	0	0	0	0	0	0	0.00321872	0.00178674	0	0	0	0.00415042	0.0022805	0	0.00173573	0.00270865	0	0	0	0	0	0	0.00230989	0	0.00116344	0
Bacteria	Lentisphaerae	Lentisphaeria	Victivallales	vadinBE97	Unknown_Genus	0.00575429	0.00387982	0.0054999	0.00558059	0.0042454	0.00649625	0.00532421	0.00185872	0.00295275	0.0042313	0.00757803	0.00333962	0.00532825	0.00471479	0.00429957	0.0048483	0.00254386	0.00500015	0.00548522	0.00364373	0.0037323	0.00468217	0.00314988	0.00525992	0.00540965	0.00410562	0.00543692	0.00363905	0.00288736	0.00607696	0.00412909	0.00684117
Bacteria	Proteobacteria	Gammaproteobacteria	Oceanospirillales	Halomonadaceae	Halomonas	0	0	0	0	0	0	0	0	0	0	0	0	0	0	0	0	0	0	0	0	0	0	0.00132522	0	0	0	0	0	0	0	0	0
Bacteria	Proteobacteria	Deltaproteobacteria	Desulfovibrionales	Desulfovibrionaceae	Desulfovibrio	0	0	0	0	0	0	0	0	0	0	0	0	0	0	0	0	0	0	0	0	0	0	0	0	0	0	0	0	0	0	0	0
Bacteria	Verrucomicrobia	OPB35_soil_group	Unknown_Order	Unknown_Family	Unknown_Genus	0.00816275	0.00654785	0.00956101	0.00509468	0.00513545	0.00809217	0.00691455	0.00950523	0.00398335	0.00479765	0.00889829	0.00494022	0.00967708	0.0136878	0.00612069	0.00523617	0.00446713	0.00410621	0.00835088	0.00280666	0.00498905	0.00964556	0.0076052	0.00508417	0.0136317	0.00405873	0.00531683	0.00499464	0.0102213	0.00530141	0.00536858	0.0101032
Bacteria	Verrucomicrobia	WCHB1-41	uncultured_rumen_bacterium	<empty>	Unknown_Genus	0.0234298	0.0272159	0.0255579	0.0168448	0.0154134	0.0289075	0.0321872	0.0112627	0.0125308	0.022823	0.0238719	0.00982852	0.0213884	0.0232355	0.0166487	0.00939493	0.0185059	0.0262631	0.0232753	0.0213981	0.0188038	0.0198042	0.0151115	0.010093	0.0189007	0.0195799	0.0290842	0.0118595	0.0193742	0.0255542	0.0193755	0.0176126
Bacteria	Elusimicrobia	Elusimicrobia	Elusimicrobiales	Elusimicrobiaceae	Elusimicrobium	0	0	0	0	0	0	0	0	0	0	0	0	0	0	0	0	0	0	0	0	0	0	0	0	0	0	0	0	0	0	0	0
Bacteria	Synergistetes	Synergistia	Synergistales	Synergistaceae	Pyramidobacter	0.00100913	0	0	0	0	0	0	0	0	0	0	0	0	0	0	0	0	0	0	0	0	0	0	0	0	0	0	0	0	0	0	0
Bacteria	Synergistetes	Synergistia	Synergistales	Synergistaceae	Fretibacterium	0	0	0	0	0	0	0	0	0	0	0	0	0	0	0	0	0	0	0	0	0	0	0	0	0	0	0	0	0	0	0	0
Bacteria	Firmicutes	Clostridia	Clostridiales	Ruminococcaceae	Candidatus_Soleaferrea	0	0	0	0	0	0	0.00145206	0	0	0	0	0	0	0	0	0	0	0	0	0	0	0	0	0	0	0	0.00135377	0	0	0.00109684	0	0
Bacteria	Actinobacteria	Actinobacteria	Bifidobacteriales	Bifidobacteriaceae	Bifidobacterium	0	0	0	0.00546279	0	0	0	0	0	0	0	0	0	0	0	0.00446044	0	0.0122057	0	0	0	0	0	0.0105449	0	0	0	0.00197901	0	0	0	0
Bacteria	Actinobacteria	Coriobacteriia	Coriobacteriales	Coriobacteriaceae	Atopobium	0	0	0	0	0	0	0	0	0	0	0	0	0	0	0	0	0	0	0	0	0	0	0	0	0	0	0	0	0	0	0	0
Bacteria	Firmicutes	Clostridia	Clostridiales	Ruminococcaceae	Ruminococcaceae_UCG-012	0	0	0	0	0	0	0	0	0	0	0	0	0	0	0	0	0	0	0	0	0	0	0	0	0	0	0	0	0	0	0	0
Bacteria	Firmicutes	Clostridia	Clostridiales	Clostridiales_vadinBB60_group	uncultured_Clostridiales_bacterium	0	0	0	0	0	0	0	0.00178511	0	0	0	0	0	0	0	0	0.00106786	0.000992171	0	0	0	0	0	0	0	0	0	0	0	0	0	0
Bacteria	Firmicutes	Clostridia	Clostridiales	Clostridiales_vadinBB60_group	Unknown_Genus	0	0	0	0	0	0	0	0	0	0	0	0	0	0	0	0	0	0	0	0	0	0	0	0	0	0	0	0	0	0	0	0
Bacteria	Elusimicrobia	Elusimicrobia	Elusimicrobiales	Elusimicrobiaceae	Unknown_Genus	0	0	0	0	0	0	0	0	0	0	0	0	0	0	0	0	0	0	0	0	0	0	0	0	0	0	0	0	0	0	0	0
Bacteria	Firmicutes	Negativicutes	Selenomonadales	Veillonellaceae	Allisonella	0	0	0	0	0	0	0	0	0.00152136	0	0	0	0	0	0	0	0.00177232	0.00554535	0	0	0	0	0	0	0.00186112	0.00167247	0.00122276	0	0	0	0	0
Bacteria	Firmicutes	Negativicutes	Selenomonadales	Veillonellaceae	Schwartzia	0.0128989	0.00536726	0.0067221	0.00452042	0.00376505	0.00436969	0.00252381	0.00631228	0.0111975	0.00826731	0.00622558	0.00442975	0.0104975	0.00756413	0.00743535	0.00338304	0.0105444	0.01113	0.0073118	0.00459335	0.0112443	0.00523968	0.00611185	0.00307561	0.0098598	0.0101963	0.00441067	0.00287065	0.00861397	0.00259254	0.00650921	0.00507424
Bacteria	Firmicutes	Negativicutes	Selenomonadales	Veillonellaceae	uncultured	0	0	0	0	0	0	0	0	0	0	0	0	0	0	0	0	0	0	0	0	0	0	0	0	0	0	0	0	0	0	0	0
Bacteria	Tenericutes	Mollicutes	Anaeroplasmatales	Anaeroplasmataceae	Anaeroplasma	0.00490662	0.00192951	0.00114485	0	0	0.00180898	0	0	0.00240473	0	0.00218969	0	0.00226022	0.00173951	0	0.00152991	0.00830249	0.00352171	0.00337973	0.00114658	0.0026937	0.00205246	0	0	0	0	0	0.00168179	0.00121269	0.00130181	0	0.00148376
Bacteria	Spirochaetae	Spirochaetes	Spirochaetales	PL-11B10	Unknown_Genus	0.00105847	0	0	0	0	0	0	0	0.00240473	0	0	0	0	0	0	0	0.0017835	0.00230852	0.00138908	0.00144202	0.000981685	0.000967023	0	0	0.00213408	0	0	0	0	0	0.000996152	0
Bacteria	Tenericutes	Mollicutes	Mollicutes_RF9	uncultured_Firmicutes_bacterium	Unknown_Genus	0	0	0	0	0	0	0	0	0	0	0	0	0	0	0	0	0	0	0	0	0	0	0	0	0	0	0	0	0	0	0	0
Bacteria	Firmicutes	Clostridia	Clostridiales	Syntrophomonadaceae	Unknown_Genus	0	0	0	0	0	0	0	0	0	0	0	0	0	0	0	0	0	0	0	0	0	0	0	0	0	0	0	0	0	0	0	0
Bacteria	Firmicutes	Clostridia	Clostridiales	Family_XIII	[Eubacterium]_nodatum_group	0	0	0	0	0	0	0	0	0	0	0	0	0	0	0	0	0	0	0	0	0	0	0	0	0	0	0	0	0	0	0	0
Bacteria	Proteobacteria	Betaproteobacteria	Burkholderiales	Alcaligenaceae	Sutterella	0.00156976	0	0	0.00371057	0	0	0.00105447	0	0.00302636	0	0.00226482	0	0	0	0	0	0.00106786	0.0037673	0	0	0	0	0	0	0	0	0.00360278	0	0	0	0	0
Bacteria	Proteobacteria	Gammaproteobacteria	Xanthomonadales	Xanthomonadaceae	Xanthomonas	0	0	0	0	0	0	0	0	0	0	0	0	0	0	0	0	0	0	0	0	0	0	0	0	0	0	0	0	0	0	0	0
Bacteria	Proteobacteria	Gammaproteobacteria	Aeromonadales	Succinivibrionaceae	Ruminobacter	0.00977736	0.00806649	0.00625024	0.00388727	0.0291174	0.0199711	0.011167	0.00281568	0.0557669	0.00915263	0.00368168	0.0112215	0.0151267	0.0092879	0.0189871	0.00364161	0.00723463	0.00382133	0.00387739	0.00370704	0.0300955	0.00594522	0.0129852	0.00406734	0.00482237	0.0260405	0.00235818	0.00133384	0.00707404	0.0128242	0.00568795	0.00634281
Bacteria	Proteobacteria	Gammaproteobacteria	Enterobacteriales	Enterobacteriaceae	Unknown_Genus	0	0	0	0	0	0	0	0	0	0	0	0	0	0	0	0	0	0	0	0	0	0	0	0	0	0	0	0	0	0	0	0
Bacteria	Tenericutes	Mollicutes	Anaeroplasmatales	Anaeroplasmataceae	Unknown_Genus	0	0	0	0	0	0	0	0	0	0	0	0	0	0	0	0.00101276	0	0	0	0	0	0	0	0	0	0	0	0	0	0	0	0
Bacteria	Tenericutes	Mollicutes	NB1-n	uncultured_bacterium	Unknown_Genus	0	0	0	0	0	0	0	0	0	0	0	0	0	0	0	0	0	0	0	0	0	0	0	0	0	0	0	0	0	0	0	0
Bacteria	Tenericutes	Mollicutes	Mollicutes_RF9	uncultured_bacterium	Unknown_Genus	0	0	0	0	0	0	0	0	0	0	0	0	0	0	0	0	0	0	0	0	0	0	0	0	0	0	0	0	0	0	0	0
Bacteria	Tenericutes	Mollicutes	Mollicutes_RF9	uncultured_rumen_bacterium	Unknown_Genus	0	0	0	0	0	0	0.00250653	0	0.00318177	0	0.00282298	0	0	0	0	0	0	0	0	0	0	0	0	0	0	0	0.00153937	0	0	0	0	0.00124591
Bacteria	Tenericutes	Mollicutes	Mollicutes_RF9	uncultured_bacterium	Unknown_Genus	0	0.00450912	0	0	0	0.00280191	0.00364743	0	0.000924267	0	0	0	0	0.00305399	0	0.00120669	0	0	0.00421646	0.00326388	0	0.00180577	0.00102853	0.0012428	0	0	0	0.00195726	0.00477378	0	0	0
Bacteria	Tenericutes	Mollicutes	Mollicutes_RF9	Unknown_Family	Unknown_Genus	0	0	0	0	0	0	0.00233366	0	0.00104696	0	0.00249023	0	0	0	0	0	0	0	0	0	0	0	0	0	0	0	0	0	0	0	0	0
Bacteria	Firmicutes	Clostridia	Clostridiales	Clostridiales_vadinBB60_group	uncultured_bacterium	0	0	0	0	0	0	0	0	0	0	0	0	0	0	0	0	0	0	0	0	0	0	0	0	0	0	0	0	0	0	0	0
Bacteria	Firmicutes	Negativicutes	Selenomonadales	Veillonellaceae	Megasphaera	0.00203172	0	0	0.00131048	0	0	0	0	0.00105514	0	0	0.001168	0.0009585	0	0	0	0	0	0	0	0	0	0	0.00199601	0	0	0	0	0	0	0	0
Bacteria	Firmicutes	Clostridia	Clostridiales	Christensenellaceae	Christensenellaceae_R-7_group	0.0187115	0.012482	0.014473	0.0260918	0.0229647	0.0148779	0.0371312	0.0323067	0.0101097	0.0192882	0.026609	0.0156858	0.0166838	0.0102088	0.0166056	0.0254913	0.00832485	0.0219162	0.0108884	0.00754773	0.0200937	0.0143031	0.0212382	0.0335555	0.0123909	0.0212784	0.0399362	0.020428	0.0113088	0.0244075	0.00828859	0.0211578
Bacteria	Firmicutes	Clostridia	Clostridiales	Clostridiaceae_1	Clostridium_sensu_stricto_12	0	0	0	0	0	0	0	0	0	0	0	0	0	0	0	0	0	0	0	0	0	0	0	0	0	0	0	0	0	0	0	0
Bacteria	Firmicutes	Bacilli	Lactobacillales	Streptococcaceae	Streptococcus	0.00348038	0	0	0	0	0	0	0	0.00302636	0	0	0	0.00140636	0	0	0	0	0	0	0	0.00301619	0	0	0	0.00115803	0	0	0	0	0	0	0
Bacteria	Firmicutes	Bacilli	Lactobacillales	Leuconostocaceae	Weissella	0	0	0	0	0	0	0	0	0	0	0	0	0	0	0	0	0	0	0	0	0	0	0	0	0	0	0	0	0	0	0	0
Bacteria	Firmicutes	Bacilli	Lactobacillales	Lactobacillaceae	Lactobacillus	0.00226046	0.00133141	0.00182557	0	0	0.00174064	0	0	0.00247834	0	0	0	0	0.00135383	0	0.00310291	0	0	0	0	0.00606558	0.00310335	0	0.0014311	0.0016047	0	0	0	0.000885458	0	0	0
Bacteria	Firmicutes	Clostridia	Clostridiales	Family_XIII	Family_XIII_UCG-001	0	0	0	0	0	0	0	0	0	0	0	0	0	0	0	0	0	0	0	0	0	0	0	0	0	0	0	0	0	0	0	0
Bacteria	Firmicutes	Clostridia	Clostridiales	Family_XIII	[Eubacterium]_saphenum_group	0	0	0	0	0	0	0	0	0	0	0	0	0	0	0	0	0	0	0	0	0	0	0	0	0	0	0	0	0	0	0	0
Bacteria	Firmicutes	Clostridia	Clostridiales	Family_XIII	Mogibacterium	0.00931541	0.0153789	0.00894218	0.00935006	0.00827182	0.0140497	0.00793445	0.00620186	0.0247916	0.00661385	0.0102722	0.00637642	0.0172697	0.0147504	0.00739224	0.00564558	0.00794467	0.0100543	0.00910557	0.00308099	0.0162381	0.0120236	0.00713049	0.0104822	0.00786633	0.00587708	0.00843923	0.00537159	0.0130605	0.00941734	0.00574118	0.00655801
Bacteria	Firmicutes	Clostridia	Clostridiales	Family_XIII	Family_XIII_AD3011_group	0.00214833	0.00226756	0.00252949	0.00220868	0.00464804	0.00730426	0.00573908	0.00345979	0.00588914	0.00257133	0.00341334	0.00159194	0.00688948	0.00581674	0.00436422	0.00607654	0	0	0	0	0.00280278	0.00205739	0.00357019	0.00318859	0.00193556	0	0	0	0.00230027	0.002587	0.00154366	0.00240121
Bacteria	Firmicutes	Clostridia	Clostridiales	Family_XIII	Anaerovorax	0.00906873	0.014734	0.0135525	0.00219395	0.00407587	0.0106288	0.00159035	0.00343219	0.00541473	0.00412715	0.00198575	0.00179959	0.00769311	0.0101773	0.00447198	0.00275815	0.0102929	0.00938633	0.0128681	0.0105584	0.00819493	0.024215	0.00281857	0	0.0169155	0.00237584	0	0	0.0289025	0.0034124	0.0134214	0.00260508
Bacteria	Firmicutes	Clostridia	Clostridiales	Family_XIII	Unknown_Genus	0	0	0	0	0	0	0	0	0.00112057	0	0	0	0	0	0	0	0	0	0	0	0	0	0	0	0	0	0	0	0	0	0	0
Bacteria	Firmicutes	Clostridia	Clostridiales	Family_XIII	Family_XIII_UCG-002	0	0	0	0	0	0	0	0	0.00189761	0	0.00099824	0	0	0	0	0	0.00130827	0.00172402	0	0	0.00137057	0	0	0	0	0	0	0	0	0	0	0
Bacteria	Firmicutes	Erysipelotrichia	Erysipelotrichales	Erysipelotrichaceae	Erysipelotrichaceae_UCG-007	0	0	0	0	0	0	0	0	0	0	0	0	0	0	0	0	0	0	0	0	0	0	0	0	0	0	0	0	0	0	0	0
Bacteria	Firmicutes	Erysipelotrichia	Erysipelotrichales	Erysipelotrichaceae	Erysipelotrichaceae_UCG-006	0	0	0	0	0	0	0	0	0	0	0	0	0	0	0	0	0	0	0	0	0	0	0	0	0	0	0	0	0	0	0	0
Bacteria	Firmicutes	Erysipelotrichia	Erysipelotrichales	Erysipelotrichaceae	Erysipelotrichaceae_UCG-009	0	0	0	0	0	0	0	0	0	0	0	0	0	0	0	0	0	0	0	0	0	0	0	0	0	0	0	0	0	0	0	0
Bacteria	Firmicutes	Erysipelotrichia	Erysipelotrichales	Erysipelotrichaceae	uncultured	0	0	0	0.00110434	0.00235934	0	0.0010199	0.00136183	0.00119419	0.00184875	0.00103044	0	0	0	0.00119612	0.00105585	0	0	0	0	0	0	0.00155763	0.00105449	0.00100914	0.00175583	0	0.00167454	0	0.00240973	0.000988548	0

## Sheet: Liquid_phase_LT
Supplementary Table S2.
b) All genera present in the liquid phase at the late time point
Treatments include different: dry matter (DM) concentrations, i.e. 25 or 35; wilting intensities (WI), i.e. low (LI) or high (HI); and sucrose addition (SA)
Domain	Phylum	Class	Order	Family	Genus	25HISA_a	25HISA_b	25HISA_c	25HISA_d	25HI_a	25HI_b	25HI_c	25HI_d	25LISA_a	25LISA_b	25LISA_c	25LISA_d	25LI_a	25LI_b	25LI_c	25LI_d	35HISA_a	35LISA_b	35HISA_c	35HISA_d	35HI_a	35HI_b	35HI_c	35HI_d	35LISA_a	35LISA_b	35LISA_c	35LISA_d	35LI_a	35LI_b	35LI_c	35LI_d
Archaea	Euryarchaeota	Methanomicrobia	Methanomicrobiales	Methanomicrobiaceae	Methanomicrobium	0.0027492	0.00383857	0.00649596	0.004328	0.00208001	0	0.00334371	0.0023974	0.00515518	0.00540074	0.00217128	0.00456729	0.00203589	0.00219658	0.00183517	0.00193846	0.00340487	0.00367197	0.00498046	0.00256702	0.00794508	0.00229366	0.00319626	0.00273665	0.00531985	0.00345524	0.00240889	0.00710064	0.00197951	0.00214562	0.00186384	0.00353666
Archaea	Euryarchaeota	Methanobacteria	Methanobacteriales	Methanobacteriaceae	Methanosphaera	0	0	0	0	0	0	0	0	0	0	0	0	0.00241228	0	0	0	0	0	0	0	0	0	0	0	0	0	0	0.00102801	0	0	0	0
Archaea	Euryarchaeota	Methanobacteria	Methanobacteriales	Methanobacteriaceae	Methanobrevibacter	0	0	0	0	0	0	0	0	0	0.00171128	0	0	0.00797249	0	0	0.00185731	0	0	0	0	0	0	0	0.0018929	0	0	0	0	0	0	0	0
Archaea	Euryarchaeota	Thermoplasmata	Thermoplasmatales	Thermoplasmatales_Incertae_Sedis	Candidatus_Methanomethylophilus	0	0	0	0	0	0	0	0	0	0	0	0	0.00118048	0	0	0	0.00101461	0	0	0	0	0	0	0	0	0	0	0	0	0	0	0
Archaea	Euryarchaeota	Thermoplasmata	Thermoplasmatales	Thermoplasmatales_Incertae_Sedis	uncultured	0.0119558	0.00523576	0.00244544	0.0256183	0.0023599	0.00197425	0.00871417	0.00715513	0.0100032	0.00215088	0.00776574	0.0229623	0.0128484	0.00143956	0.00195052	0.0103144	0.00966063	0.00318979	0.00627169	0.0177447	0.00589652	0.00594886	0.0020284	0.014416	0.0112289	0.00301962	0.00870742	0.0132907	0.00182349	0.00395123	0.00230871	0.00255207
Bacteria	Bacteroidetes	Bacteroidia	Bacteroidales	Prevotellaceae	Unknown_Genus	0.00372297	0.0174942	0.00276478	0.00425198	0.00351241	0.0108028	0.00156496	0.00484423	0.00376319	0.00821101	0.0109933	0.00484928	0.00150553	0.00479648	0.00664856	0.00321874	0.00249608	0.00898211	0.0034271	0.00300187	0.00357113	0.00508481	0.00460999	0.00103804	0.00661263	0.00585114	0.00244431	0.00290781	0.00431007	0.00793763	0.00143431	0.0038596
Bacteria	Bacteroidetes	Bacteroidia	Bacteroidales	Prevotellaceae	Prevotella_1	0.110504	0.112657	0.132171	0.0653608	0.118698	0.0603537	0.0502839	0.0494062	0.100406	0.0663945	0.0625954	0.0483871	0.0564062	0.151421	0.058327	0.0776464	0.22118	0.309206	0.162409	0.0654238	0.10993	0.144375	0.0757064	0.113879	0.0897224	0.068788	0.0644732	0.178302	0.135445	0.124516	0.0568126	0.0533256
Bacteria	Bacteroidetes	Bacteroidia	Bacteroidales	Prevotellaceae	Prevotella_7	0.00169673	0.0096332	0.0265763	0.0652493	0.00316117	0	0.00141103	0.00390504	0	0.0643379	0.0271018	0.0240601	0	0.00129064	0	0.00210976	0.00253965	0.0167279	0.0223247	0.109119	0.000920466	0.00241934	0.00358555	0.000999184	0.0293164	0.177584	0.185073	0.00450123	0.0016626	0.00471919	0	0.00149658
Bacteria	Bacteroidetes	Bacteroidia	Bacteroidales	Prevotellaceae	Prevotellaceae_YAB2003_group	0.0299461	0.0421214	0.0274755	0.0243919	0.00986219	0.00322554	0.00366867	0.00506667	0.0802269	0.0180077	0.0215269	0.0221617	0.00776719	0.0085443	0.0035445	0.00500392	0.0386799	0.0245787	0.045062	0.0199189	0.0113432	0.0103372	0.0106542	0.00827657	0.0356201	0.0199988	0.0163238	0.0678636	0.00905408	0.00935631	0.00395778	0.00519865
Bacteria	Bacteroidetes	Bacteroidia	Bacteroidales	Prevotellaceae	Prevotella_9	0	0	0	0	0	0	0	0	0	0	0	0	0	0	0	0	0	0	0	0	0	0	0	0	0	0	0	0	0	0	0	0
Bacteria	Bacteroidetes	Bacteroidia	Bacteroidales	Porphyromonadaceae	uncultured	0	0	0	0	0	0	0	0	0	0	0	0	0	0	0	0	0	0	0	0	0	0	0	0	0	0	0	0	0	0	0	0.00189829
Bacteria	Bacteroidetes	Bacteroidia	Bacteroidales	Bacteroidales_S24-7_group	Unknown_Genus	0	0	0	0	0	0	0	0	0	0	0	0	0	0	0	0	0	0	0	0	0	0	0	0	0	0	0	0	0	0	0	0
Bacteria	Bacteroidetes	Bacteroidia	Bacteroidales	Bacteroidales_BS11_gut_group	uncultured_rumen_bacterium	0.0333592	0.0240757	0.0141852	0.0205605	0.0233685	0.00428218	0.0204813	0.0211812	0.0354527	0.00992229	0.031728	0.0275951	0.00506407	0.0313229	0.00746652	0.0100529	0.0339741	0.0194293	0.0215043	0.0144202	0.00869252	0.0256806	0.0116787	0.00129339	0.0137515	0.00505911	0.029523	0.0323384	0.0576253	0.00404502	0.00339019	0.0137843
Bacteria	Bacteroidetes	Bacteroidia	Bacteroidales	Rikenellaceae	Unknown_Genus	0	0	0	0	0	0	0	0	0	0	0	0	0	0	0	0	0	0	0	0	0	0	0	0	0	0	0	0	0	0	0	0
Bacteria	Bacteroidetes	Bacteroidia	Bacteroidales	Bacteroidales_BS11_gut_group	Unknown_Genus	0.0373478	0.0444819	0.0944772	0.0323586	0.104297	0.0496482	0.0184887	0.10514	0.0212447	0.0618102	0.022505	0.0338392	0.0509487	0.088862	0.0482807	0.0742834	0.0306252	0.147219	0.196233	0.040455	0.0765163	0.0990726	0.0363882	0.0706201	0.315633	0.05865	0.016097	0.0341374	0.0648168	0.231164	0.0478692	0.0416759
Bacteria	Bacteroidetes	Bacteroidia	Bacteroidales	Bacteroidales_BS11_gut_group	uncultured_bacterium	0.00491807	0.00115451	0	0.0136935	0	0.00355921	0.00549873	0.0184625	0	0.00653112	0.0021615	0.00201928	0.00107783	0	0.00293627	0.00412936	0	0.010509	0.00636392	0.00899157	0	0.014825	0.00338066	0.00412441	0.00523977	0.00413837	0.00467608	0.00113082	0.00519256	0.00170594	0.00237774	0.00318221
Bacteria	Bacteroidetes	Bacteroidia	Bacteroidales	Marinilabiaceae	uncultured	0	0	0	0	0	0	0	0	0	0	0	0	0	0	0	0	0	0	0	0	0	0	0	0	0	0	0	0	0	0	0	0
Bacteria	Bacteroidetes	Bacteroidetes_BD2-2	Unknown_Order	Unknown_Family	Unknown_Genus	0	0	0	0	0	0	0	0	0	0	0	0	0	0	0	0	0	0	0	0	0	0	0	0	0	0	0	0	0	0	0	0
Bacteria	Bacteroidetes	Bacteroidia	Bacteroidales	PeH15	uncultured_rumen_bacterium	0.00210985	0.00448569	0.0032942	0	0.0038417	0.00823068	0.00588356	0.00407805	0.00311039	0.00340686	0.00447948	0.00205453	0.00265179	0.00595681	0.00621861	0.00168601	0	0.00160108	0	0.00152899	0.00301055	0.00573416	0.0141373	0.00133224	0	0.0024058	0.00518619	0	0.00633346	0.00211045	0.00226269	0.0100507
Bacteria	Bacteroidetes	Bacteroidia	Bacteroidales	Bacteroidales_S24-7_group	uncultured_bacterium	0.00682627	0.00881695	0.00886157	0.00356781	0.00392402	0.00604788	0.00525929	0.00773594	0.00647038	0.00453725	0.00472399	0.0049651	0.00749346	0.00454207	0.00296773	0.00384085	0.00217862	0.00157017	0.00225237	0.0022023	0	0.00153958	0.00327822	0.0013711	0.00709885	0.0024553	0.0024514	0.00120424	0.0015017	0.00693516	0	0.00205583
Bacteria	Bacteroidetes	Bacteroidia	Bacteroidales	Bacteroidales_S24-7_group	uncultured_rumen_bacterium	0	0	0	0	0	0	0	0	0	0	0	0	0	0	0	0	0	0	0	0	0	0	0	0	0	0	0	0	0	0	0	0
Bacteria	Bacteroidetes	Bacteroidia	Bacteroidales	Rikenellaceae	SP3-e08	0	0	0	0.0074701	0	0.00257209	0.00213792	0	0.00325439	0.00461575	0.00528148	0.00667217	0	0	0.00467706	0.00421952	0.0030314	0	0	0.00866894	0	0	0.003688	0.00502923	0	0.00168307	0.0077722	0.002291	0	0	0.00261551	0
Bacteria	Bacteroidetes	Bacteroidia	Bacteroidales	Rikenellaceae	Rikenellaceae_RC9_gut_group	0.203131	0.149741	0.131684	0.27203	0.055551	0.231196	0.322424	0.15546	0.189839	0.187079	0.291059	0.325355	0.17998	0.0940184	0.318281	0.299108	0.196562	0.0914469	0.108298	0.345649	0.150437	0.0761936	0.306431	0.299078	0.0788253	0.267232	0.311342	0.183838	0.0698778	0.0532712	0.371894	0.368726
Bacteria	Bacteroidetes	Bacteroidia	Bacteroidales	Prevotellaceae	Prevotellaceae_UCG-001	0.00301969	0.00197812	0.00115129	0.00449017	0	0.00414315	0.0017531	0.00378147	0.00226079	0.00160138	0.00161379	0.00309186	0.00171083	0	0.00200296	0.0052744	0	0	0	0.00214619	0.00266451	0.00199517	0.00252013	0.00334171	0.00142435	0	0	0	0.00169185	0.00259702	0.00150334	0.00201645
Bacteria	Bacteroidetes	Bacteroidia	Bacteroidales	Prevotellaceae	Prevotellaceae_Ga6A1_group	0.066689	0.00710357	0.00609259	0.00776911	0.00319959	0.0108584	0.00538756	0.0103805	0.0291695	0.0220111	0.0157075	0.0088828	0.0134643	0.0066828	0.00742458	0.0225041	0.0322498	0.00322688	0.00505813	0.00687343	0.0149766	0.0053414	0.00909706	0.0259011	0.00471922	0.00843514	0.00427223	0.0333443	0.00595316	0.0037519	0.00327514	0.00481269
Bacteria	Bacteroidetes	Bacteroidia	Bacteroidales	Prevotellaceae	Prevotellaceae_UCG-004	0.0157476	0.0193694	0.0374043	0.0184877	0.02985	0.0106498	0.014307	0.0163493	0.0143808	0.0142711	0.0145534	0.0214718	0.0317702	0.0247394	0.0138005	0.0335578	0.0131464	0.00914284	0.00560181	0.0177166	0.0272126	0.0174695	0.0146086	0.0194619	0.0030203	0.0143655	0.0165576	0.0099497	0.0149877	0.00910423	0.0114285	0.0138631
Bacteria	Bacteroidetes	Bacteroidia	Bacteroidales	Bacteroidales_Incertae_Sedis	Phocaeicola	0	0	0	0	0	0.00133471	0	0	0	0	0	0	0.00275444	0.00286051	0	0	0	0	0	0	0.000968912	0.00145056	0	0	0	0	0	0	0.0030034	0.00426779	0	0
Bacteria	Bacteroidetes	Bacteroidia	Bacteroidales	Bacteroidales_UCG-001	Unknown_Genus	0	0	0	0	0	0	0	0	0	0	0	0	0	0	0	0	0	0	0	0	0	0	0	0	0	0	0	0	0	0	0	0
Bacteria	Bacteroidetes	Bacteroidia	Bacteroidales	Bacteroidales_UCG-001	uncultured_rumen_bacterium	0	0	0	0	0	0	0	0	0	0	0	0	0	0	0	0	0	0	0	0	0	0	0	0	0	0	0	0	0	0	0	0
Bacteria	Bacteroidetes	Bacteroidia	Bacteroidales	Prevotellaceae	Prevotellaceae_UCG-003	0.0220821	0.022877	0.026862	0.0174539	0	0.00400411	0.00162482	0.00269398	0.0305951	0.0243661	0.0288623	0.0198503	0.00335324	0	0.00218123	0.00484163	0.0152379	0.00948283	0.0157132	0.0125124	0.00200011	0	0.00194644	0.00308082	0.00882637	0.0155832	0.0102732	0.0234828	0	0	0	0.00162261
Bacteria	Bacteroidetes	Bacteroidia	Bacteroidales	Bacteroidales_RF16_group	Unknown_Genus	0	0	0	0	0	0	0	0	0	0	0	0	0	0	0	0	0	0	0	0	0	0	0	0	0	0	0	0	0	0	0	0
Bacteria	Bacteroidetes	Bacteroidia	Bacteroidales	Porphyromonadaceae	Unknown_Genus	0.00171641	0.00300026	0.00229417	0.0016268	0.00321605	0.00244696	0.00230896	0.00294114	0.00233759	0.00282597	0.00179962	0.00200417	0.00427709	0.00476545	0.00268459	0.00595963	0.00276374	0.00176799	0.00189316	0.00270729	0.00599341	0.00629448	0.00751941	0.00639478	0	0.00260381	0.00342912	0.00237912	0.00766939	0.00402157	0.00823771	0.0110117
Bacteria	Bacteroidetes	Bacteroidia	Bacteroidales	Unknown_Family	Unknown_Genus	0.00180985	0.00103686	0.00238241	0	0	0	0	0.0076	0	0	0	0	0	0	0	0.0015688	0	0	0.001199	0.00418017	0	0.00164955	0	0.00210939	0.00160168	0.00680158	0.00393924	0	0	0.00160042	0	0.00153597
Bacteria	Spirochaetae	Spirochaetes	Spirochaetales	Spirochaetaceae	Unknown_Genus	0	0	0	0.00388709	0	0.00273893	0.00337792	0.00161886	0	0.00505534	0.00673878	0.00387741	0	0	0.00494972	0.00290318	0	0	0	0.00262313	0.00188246	0	0.00397484	0.00409665	0.00237963	0.00267311	0.00228136	0.00107207	0	0	0.00352826	0.0029144
Bacteria	Spirochaetae	Spirochaetes	Spirochaetales	Spirochaetaceae	Treponema_2	0.0843399	0.0930156	0.11078	0.0987634	0.0827777	0.0836276	0.0819423	0.0875422	0.0960621	0.0869613	0.0721607	0.054742	0.0914783	0.0762782	0.0812299	0.111439	0.0871387	0.0523163	0.082731	0.0648207	0.108054	0.0778065	0.0877743	0.0904761	0.0819257	0.067897	0.0573528	0.0868892	0.0561284	0.0703834	0.041342	0.0750969
Bacteria	SR1_(Absconditabacteria)	uncultured_bacterium	Unknown_Order	Unknown_Family	Unknown_Genus	0	0.00254434	0.000907586	0	0	0	0	0	0	0	0	0	0	0	0	0	0	0.00171235	0	0	0	0	0	0	0	0.00203948	0	0	0	0	0	0
Bacteria	SR1_(Absconditabacteria)	uncultured_rumen_bacterium	Unknown_Order	Unknown_Family	Unknown_Genus	0	0	0	0	0	0	0	0	0	0	0	0	0	0	0	0	0	0	0	0	0	0	0	0	0	0	0	0	0	0	0	0
Bacteria	Cyanobacteria	Melainabacteria	Gastranaerophilales	uncultured_bacterium	Unknown_Genus	0	0	0	0	0	0	0	0	0	0	0	0	0	0	0	0	0	0	0	0	0	0	0	0	0	0	0	0	0	0	0	0
Bacteria	Chloroflexi	Anaerolineae	Anaerolineales	Anaerolineaceae	uncultured	0	0	0	0	0	0	0	0	0	0	0	0	0	0	0	0	0	0	0	0	0	0	0	0	0	0	0	0	0	0	0	0
Bacteria	Elusimicrobia	Elusimicrobia	Lineage_I	Unknown_Family	Candidatus_Endomicrobium	0	0	0	0	0	0	0	0	0	0	0	0	0	0	0	0	0	0	0.00105823	0	0	0	0	0	0.00191057	0	0	0	0	0	0	0
Bacteria	Elusimicrobia	Elusimicrobia	Lineage_IV	uncultured_bacterium	Unknown_Genus	0	0	0	0	0	0	0	0	0	0	0	0	0	0	0	0	0.00100839	0	0	0	0	0	0	0	0	0	0	0	0	0	0	0
Bacteria	Elusimicrobia	Elusimicrobia	Lineage_IV	uncultured_bacterium	Unknown_Genus	0.00571971	0.00670647	0.00138239	0	0.00293067	0	0	0.00284228	0.00204479	0.00191538	0.00197567	0.00235163	0.00268601	0.00158228	0	0.00140651	0.00394019	0.00714612	0.00333487	0.00154302	0.00254685	0.0030268	0	0	0.00529125	0.00197018	0.00142408	0.00837831	0.00430032	0.00137765	0	0.00105548
Bacteria	Planctomycetes	Planctomycetacia	Planctomycetales	Planctomycetaceae	CPla-4_termite_group	0	0	0	0	0	0	0	0	0	0	0	0	0	0	0	0	0	0	0	0	0	0	0	0	0	0	0	0	0	0	0	0
Bacteria	Planctomycetes	Planctomycetacia	Planctomycetales	Planctomycetaceae	p-1088-a5_gut_group	0	0	0	0	0	0	0.00110317	0	0	0	0	0	0	0	0	0	0	0	0	0	0	0	0	0	0	0	0	0	0	0	0	0
Bacteria	Lentisphaerae	Oligosphaeria	Oligosphaerales	Oligosphaeraceae	horsej-a03	0	0.00206636	0	0.00146969	0	0	0	0	0	0.00202528	0	0	0	0	0	0	0	0.00131672	0.0013155	0	0	0	0	0	0.00159023	0	0	0	0	0	0	0
Bacteria	Firmicutes	Erysipelotrichia	Erysipelotrichales	Erysipelotrichaceae	Kandleria	0	0	0	0	0	0	0	0	0	0	0	0	0	0	0	0	0	0	0	0	0	0	0	0	0.00108113	0	0	0	0	0	0	0
Bacteria	Firmicutes	Erysipelotrichia	Erysipelotrichales	Erysipelotrichaceae	Erysipelotrichaceae_UCG-002	0	0	0	0	0	0	0	0	0	0	0	0	0	0	0	0	0	0	0	0	0	0	0	0	0	0	0	0	0	0	0	0
Bacteria	Firmicutes	Clostridia	Halanaerobiales	ODP1230B8.23	Unknown_Genus	0	0	0	0	0	0	0	0	0	0	0	0	0	0	0	0	0	0	0	0	0	0	0	0	0	0	0	0	0	0.0010904	0	0
Bacteria	Fibrobacteres	Fibrobacteria	Fibrobacterales	Fibrobacteraceae	Fibrobacter	0.00436232	0	0	0.00216906	0	0	0	0.00421399	0.00388799	0.00175838	0.00166269	0.00445651	0	0	0.00161495	0.000973736	0.00197943	0	0.00212131	0.00241271	0	0	0	0.00125453	0.00204786	0.00172267	0	0.00461137	0	0.000990737	0	0
Bacteria	Verrucomicrobia	Opitutae	Opitutae_vadinHA64	uncultured_bacterium	Unknown_Genus	0	0	0	0	0	0.00335067	0	0	0	0	0	0	0	0	0	0	0	0	0	0	0	0	0	0	0	0	0	0	0	0	0	0
Bacteria	Proteobacteria	Epsilonproteobacteria	Campylobacterales	Campylobacteraceae	Campylobacter	0.00169181	0.00173545	0.00456734	0.00919826	0	0	0	0	0.0013296	0.00786561	0.00309065	0.00467807	0	0	0	0	0.00239026	0.00494541	0.00792214	0.0176184	0	0	0	0	0.00414147	0.0179098	0.0162033	0.00588171	0	0	0	0
Bacteria	Synergistetes	Synergistia	Synergistales	Synergistaceae	Synergistes	0	0	0	0	0	0	0	0	0	0	0	0	0.00148843	0	0	0	0	0	0	0	0	0	0	0	0	0	0	0	0.00196976	0	0	0
Bacteria	Proteobacteria	Gammaproteobacteria	Aeromonadales	Succinivibrionaceae	Anaerobiospirillum	0	0	0	0	0	0	0	0	0	0	0	0	0	0	0	0	0	0	0	0	0	0	0	0	0	0	0	0	0	0	0	0
Bacteria	Proteobacteria	Gammaproteobacteria	Aeromonadales	Succinivibrionaceae	Succinivibrio	0.00190329	0.00246345	0.00363454	0.00212852	0.0127983	0.0126658	0.00661045	0.00430049	0.00211199	0.00204098	0.00253316	0	0.00376384	0.00637255	0.0134544	0.00432772	0	0	0	0	0.00352269	0.013364	0.00852337	0.00588963	0.00274573	0.00199988	0.00206881	0.00225429	0.0218185	0.0055282	0.00442566	0.0049781
Bacteria	Firmicutes	Clostridia	Clostridiales	Lachnospiraceae	Oribacterium	0.00325576	0.0037871	0.00630268	0.00281269	0	0	0	0	0.00440159	0.00251197	0.00244513	0	0	0.00146438	0	0	0.00518512	0.00961883	0.00614548	0.0032263	0	0	0	0	0.00413003	0.00531652	0.0070212	0.00619011	0.00303265	0	0	0
Bacteria	Firmicutes	Clostridia	Clostridiales	Lachnospiraceae	Lachnospiraceae_NK4A136_group	0.0142132	0.00800071	0.00950024	0.018062	0.0260193	0.0657898	0.0393549	0.0282498	0.0109392	0.0267839	0.0232287	0.0252435	0.0321979	0.0163999	0.0466553	0.0344594	0.00972288	0.0069854	0.00874736	0.00730828	0.0195651	0.015333	0.0461614	0.0608448	0.0107083	0.00397996	0.00473275	0.00847377	0.0245391	0.0262575	0.0531693	0.0413923
Bacteria	Firmicutes	Clostridia	Clostridiales	Lachnospiraceae	Lachnospiraceae_UCG-009	0	0	0	0	0.00283188	0.00276673	0.00163337	0	0	0	0.00171159	0	0.00109493	0.0023517	0	0	0	0	0	0	0	0	0	0	0	0	0	0	0	0	0	0
Bacteria	Firmicutes	Clostridia	Clostridiales	Lachnospiraceae	Lachnospiraceae_FCS020_group	0	0	0	0	0.00283188	0	0.00176165	0	0	0	0.00130081	0	0	0.0017312	0	0	0	0	0	0	0	0	0	0	0	0	0	0	0	0	0	0
Bacteria	Firmicutes	Clostridia	Clostridiales	Lachnospiraceae	Unknown_Genus	0.0116017	0.00811836	0.00642873	0.0130549	0.0255693	0.0288769	0.0255952	0.0241347	0.010392	0.0100322	0.0179277	0.00830874	0.0216763	0.0163068	0.0142724	0.0300776	0.00844683	0.00165053	0.0117619	0.00489557	0.0191014	0.0174172	0.0248735	0.0187902	0.0124873	0.00346514	0.00547668	0.00615339	0.0137103	0.0245398	0.0367859	0.0170689
Bacteria	Firmicutes	Clostridia	Clostridiales	Lachnospiraceae	[Eubacterium]_cellulosolvens_group	0	0	0	0	0	0	0	0	0	0	0	0	0	0	0	0	0	0	0	0	0	0	0	0	0	0	0	0	0	0	0	0
Bacteria	Firmicutes	Clostridia	Clostridiales	Lachnospiraceae	Syntrophococcus	0	0	0	0	0	0	0	0	0	0	0	0	0	0	0	0	0	0	0	0	0	0	0	0	0	0	0	0	0	0	0	0
Bacteria	Firmicutes	Clostridia	Clostridiales	Lachnospiraceae	Coprococcus_1	0	0	0	0	0	0	0	0	0	0	0.00169203	0	0.00159108	0.00134028	0	0	0	0	0	0	0.00347424	0.00120443	0	0	0	0	0	0	0.00179424	0	0	0
Bacteria	Firmicutes	Clostridia	Clostridiales	Lachnospiraceae	Roseburia	0.0329461	0.0511148	0.0236519	0.0247618	0.0436911	0.049106	0.0361736	0.0289294	0.0411695	0.040427	0.042379	0.019654	0.0431301	0.0269422	0.0291635	0.0211968	0.0227448	0.0165239	0.0170821	0.0100296	0.0330468	0.0161499	0.0416948	0.0209773	0.0131395	0.0113063	0.0131355	0.0156699	0.0239443	0.0197327	0.0314015	0.0298844
Bacteria	Firmicutes	Clostridia	Clostridiales	Lachnospiraceae	Pseudobutyrivibrio	0.0458167	0.042342	0.0303957	0.0180722	0.0504744	0.0570586	0.0290586	0.0300293	0.0549886	0.0435513	0.0355424	0.02193	0.0492549	0.0534252	0.0578446	0.0331521	0.0532082	0.0299754	0.0294168	0.0274236	0.0909808	0.0512722	0.0722437	0.0353101	0.0252893	0.0179593	0.0257113	0.0457172	0.088298	0.0578907	0.0600877	0.0615174
Bacteria	Firmicutes	Clostridia	Clostridiales	Lachnospiraceae	[Eubacterium]_oxidoreducens_group	0.00294592	0.0033753	0.00205047	0.00264038	0.0013885	0.00166838	0.00128275	0	0.00367199	0.00356386	0.00332538	0.00254801	0.00165951	0.0017312	0	0.0014606	0.00524737	0.00241707	0.00407272	0.00298784	0.00532209	0.00140343	0.00438462	0.00375804	0.00305462	0.00352454	0.00573882	0.00406065	0.0024817	0.00287842	0.00329815	0.00396988
Bacteria	Firmicutes	Clostridia	Clostridiales	Lachnospiraceae	uncultured	0.00132296	0.00152219	0.00147062	0	0	0	0	0	0.0011568	0.00125599	0.00126169	0	0.00148843	0.00145818	0	0	0	0	0.00115046	0	0.0025953	0.00189044	0	0	0.00186481	0	0	0.00240849	0.00138956	0.0013542	0.0016951	0
Bacteria	Firmicutes	Clostridia	Clostridiales	Lachnospiraceae	Lachnospiraceae_UCG-001	0	0	0	0	0	0	0	0	0	0	0	0	0	0	0	0	0	0	0	0	0.00600725	0	0	0	0	0	0	0	0	0	0	0
Bacteria	Firmicutes	Clostridia	Clostridiales	Lachnospiraceae	Anaerostipes	0	0.00198547	0	0	0.00260687	0	0	0	0	0	0	0	0	0.00264954	0	0	0	0.00121163	0	0	0	0.00520001	0	0	0	0	0	0	0	0	0	0
Bacteria	Firmicutes	Clostridia	Clostridiales	Lachnospiraceae	Coprococcus_2	0	0	0	0	0.00364413	0	0.00171889	0	0	0	0	0	0.00155686	0.00258749	0.00147862	0	0	0	0	0	0	0	0.00133178	0	0	0	0	0	0.00184299	0	0.0025158	0
Bacteria	Firmicutes	Clostridia	Clostridiales	Lachnospiraceae	[Eubacterium]_ruminantium_group	0	0.0383563	0.0143617	0.00303061	0.0615221	0.0318244	0.0173941	0.0466381	0	0.00978099	0.0179473	0.00416444	0.0128484	0.0330603	0.0195577	0.00935869	0	0.0135133	0.00566006	0	0.004893	0.0151602	0.0200381	0.00226482	0.00616073	0.00161377	0.00373377	0	0.00792293	0.00662446	0.00915813	0.0137764
Bacteria	Firmicutes	Clostridia	Clostridiales	Lachnospiraceae	Lachnoclostridium_10	0	0	0	0	0	0	0	0	0	0	0	0	0	0	0	0	0	0	0	0	0	0	0	0	0	0	0	0	0	0	0	0
Bacteria	Firmicutes	Clostridia	Clostridiales	Lachnospiraceae	Lachnospiraceae_UCG-006	0	0	0	0	0	0	0	0	0	0	0	0	0	0	0	0	0	0	0	0	0	0	0	0	0	0	0	0	0	0	0	0
Bacteria	Firmicutes	Clostridia	Clostridiales	Lachnospiraceae	[Eubacterium]_ventriosum_group	0.00120984	0.00130894	0.0023614	0	0	0	0	0	0	0	0.00396111	0	0	0	0	0	0.00169933	0.00246653	0.00361642	0	0	0	0	0	0.0056173	0	0.00404551	0.0023424	0	0	0	0
Bacteria	Firmicutes	Clostridia	Clostridiales	Lachnospiraceae	[Bacteroides]_pectinophilus_group	0	0	0	0	0	0	0	0	0	0	0	0	0	0	0	0	0	0	0	0	0	0	0	0	0	0	0	0	0	0	0	0
Bacteria	Firmicutes	Clostridia	Clostridiales	Lachnospiraceae	Lachnoclostridium_1	0.00298526	0.00364003	0.0023572	0.00306609	0	0.00232183	0.00253985	0.00195252	0.00383039	0.00328126	0.00384375	0.00146032	0.00343878	0.00317697	0.00218123	0.00168601	0.00471205	0.00597777	0.00477173	0.00201995	0.00755059	0.00293254	0.00530662	0.00289208	0.00498235	0.00222759	0.00606473	0.00350259	0.0147586	0.012393	0.00544579	0.00564763
Bacteria	Firmicutes	Clostridia	Clostridiales	Lachnospiraceae	Butyrivibrio_2	0.0567004	0.0518502	0.0420179	0.0377357	0.0670377	0.0648722	0.0746648	0.0612078	0.0694846	0.0401758	0.0482082	0.0339551	0.0880396	0.0620129	0.0836838	0.0474246	0.0353933	0.0274594	0.0255479	0.0148831	0.0882402	0.0401181	0.049624	0.0475279	0.0244198	0.0113261	0.0127742	0.0261703	0.0363918	0.0944601	0.0603869	0.0460317
Bacteria	Firmicutes	Clostridia	Clostridiales	Lachnospiraceae	[Ruminococcus]_gauvreauii_group	0	0	0	0	0	0	0	0	0	0	0	0	0	0	0	0	0	0	0	0	0	0	0	0	0	0	0	0	0	0	0	0
Bacteria	Firmicutes	Clostridia	Clostridiales	Lachnospiraceae	uncultured_bacterium	0	0	0	0	0	0.00157106	0.00124	0.0012852	0	0	0	0	0	0	0	0.00133438	0	0	0	0	0	0	0	0	0	0	0	0	0	0.00172353	0.00164908	0.00144932
Bacteria	Firmicutes	Clostridia	Clostridiales	Lachnospiraceae	Moryella	0.00223772	0	0	0	0	0	0	0.00145821	0	0	0	0	0.00294264	0	0	0.00109095	0.00192964	0	0	0	0.00124574	0	0	0	0	0	0	0	0	0	0	0
Bacteria	Firmicutes	Clostridia	Clostridiales	Lachnospiraceae	Lachnospira	0.00160329	0.0723152	0.108784	0.00296473	0.090483	0.0048244	0.00655914	0.0491467	0.00269279	0.00211948	0.0011052	0.00120351	0.0151922	0.0855175	0.00363888	0.00260565	0	0.0321885	0.043596	0	0.00760596	0.143893	0.00284795	0.00555102	0.0448126	0	0.00126112	0	0.143061	0.117183	0.00205559	0.00272535
Bacteria	Firmicutes	Clostridia	Clostridiales	Lachnospiraceae	[Eubacterium]_eligens_group	0.0122706	0.00377975	0	0.0123606	0	0.0138893	0.00634535	0.0162504	0.0263903	0.00164848	0.00447948	0.0122718	0.0215223	0	0.0133496	0.0159945	0.00292558	0.00193489	0	0.0067051	0.00575118	0.00319961	0.0055115	0.0107967	0	0	0	0.00242317	0	0	0.00836811	0.00976716
Bacteria	Firmicutes	Clostridia	Clostridiales	Lachnospiraceae	Lachnospiraceae_NK3A20_group	0.00109181	0.00506662	0.00325218	0.0025897	0.00247515	0.00157106	0.00163337	0.00114927	0.0011808	0.00414475	0.00387309	0.00180274	0.00224119	0.00269918	0.00177225	0.00117209	0.00130095	0.00641049	0.00316012	0.0014308	0.00164715	0.00182236	0	0.00116016	0.0030775	0.00276221	0.00195545	0.00241583	0.00272549	0.00245633	0.00239308	0.00183528
Bacteria	Firmicutes	Clostridia	Clostridiales	Lachnospiraceae	Shuttleworthia	0	0	0	0	0	0	0	0	0	0	0	0	0	0	0	0	0	0.00115599	0.00128152	0	0	0	0	0	0	0	0	0	0	0	0	0
Bacteria	Firmicutes	Clostridia	Clostridiales	Lachnospiraceae	Lachnospiraceae_UCG-008	0	0	0	0	0	0	0	0	0	0	0	0	0	0	0	0	0	0	0	0	0	0	0	0	0	0	0	0	0	0	0	0
Bacteria	Firmicutes	Clostridia	Clostridiales	Lachnospiraceae	probable_genus_10	0	0	0	0	0	0.00257209	0	0.00243447	0	0	0	0	0.00236095	0	0	0	0	0	0	0	0	0.00262357	0	0	0	0	0	0	0	0.00340603	0.002953	0.00158323
Bacteria	Firmicutes	Clostridia	Clostridiales	Unknown_Family	Unknown_Genus	0	0	0	0	0	0	0	0	0	0	0	0	0	0	0	0	0	0	0	0	0	0	0	0	0	0	0	0	0	0	0	0
Bacteria	Firmicutes	Clostridia	Clostridiales	Lachnospiraceae	Lachnospiraceae_ND3007_group	0	0	0	0	0	0	0	0	0	0	0	0	0	0	0	0	0	0	0	0	0	0	0	0	0	0	0	0	0	0	0	0
Bacteria	Firmicutes	Clostridia	Clostridiales	Lachnospiraceae	Lachnospiraceae_AC2044_group	0.00146067	0	0	0	0.00818831	0.00688207	0.00272799	0.00346016	0.0015792	0	0.00107586	0	0.0067578	0.00647803	0.00178274	0.00731204	0.00106441	0	0	0	0.00488608	0.00383324	0.00180302	0.00454629	0	0	0	0.0011455	0.00603605	0.00205182	0.00181782	0.00147295
Bacteria	Firmicutes	Clostridia	Clostridiales	Ruminococcaceae	Ruminococcaceae_UCG-014	0.0115624	0.00441951	0.00265973	0	0	0	0.00138537	0.0723422	0.00828957	0.000941989	0	0.109781	0.00248071	0.0033383	0	0	0.00736374	0.00464869	0.00680081	0.00778521	0.00182709	0.00242982	0	0	0	0.00394036	0	0.00983956	0	0	0	0
Bacteria	Tenericutes	Unknown_Class	Unknown_Order	Unknown_Family	Unknown_Genus	0	0	0	0.0333823	0	0.0115674	0	0.00322537	0	0.0219012	0.00380462	0.0190598	0	0.00163192	0.0128357	0.008971	0	0	0.00431543	0.029682	0	0	0.012949	0.0239027	0.00517112	0.0188108	0.00651817	0.0045306	0	0	0.00256949	0.0213854
Bacteria	Firmicutes	Clostridia	Clostridiales	Ruminococcaceae	Ruminiclostridium_6	0	0	0	0	0	0.0338542	0.0169152	0	0.0013632	0.008368	0.00327648	0	0.00549178	0	0	0	0	0	0	0	0.00238076	0.00162337	0	0	0	0	0.00241597	0	0	0	0.0363334	0.0104761
Bacteria	Firmicutes	Clostridia	Clostridiales	Ruminococcaceae	Ruminococcus_2	0	0	0	0	0	0	0	0	0	0	0	0	0	0	0	0	0	0	0	0	0	0	0	0	0	0	0	0	0	0	0	0
Bacteria	Firmicutes	Clostridia	Clostridiales	Ruminococcaceae	uncultured	0	0	0	0	0	0	0	0.000976261	0.0012096	0	0	0	0.00251493	0	0	0	0	0	0	0	0.00268527	0	0	0.00104359	0.00194489	0.00168307	0	0	0	0	0	0
Bacteria	Firmicutes	Clostridia	Clostridiales	Ruminococcaceae	Ruminococcus_1	0.00636398	0.00369886	0.00252948	0.00547334	0.0107293	0.0149459	0.0644027	0.0130621	0.00770878	0.00406625	0.00129103	0.0024473	0.0271681	0.0121432	0.00393251	0.0101882	0.0112043	0.00464869	0.0014223	0.00213217	0.0132533	0.00889187	0.00887168	0.00794906	0.00296882	0.00540562	0.00187751	0.00737232	0.01529	0.00801384	0.0183009	0.0110432
Bacteria	Firmicutes	Clostridia	Clostridiales	Clostridiaceae_1	Clostridium_sensu_stricto_1	0	0	0	0	0	0	0	0	0	0	0	0	0	0	0	0	0	0	0	0	0	0	0	0	0	0	0	0	0	0	0	0
Bacteria	Firmicutes	Clostridia	Clostridiales	Lachnospiraceae	Tyzzerella_3	0	0	0	0	0	0	0	0	0	0	0	0	0	0	0	0	0	0	0	0	0.00191706	0	0	0	0	0	0	0	0	0	0	0
Bacteria	Firmicutes	Clostridia	Clostridiales	Lachnospiraceae	[Eubacterium]_hallii_group	0	0	0	0	0	0	0	0	0	0	0	0	0	0	0	0	0	0	0	0	0	0	0	0	0	0	0	0	0	0	0	0
Bacteria	Firmicutes	Clostridia	Clostridiales	Ruminococcaceae	Ruminococcaceae_NK4A214_group	0	0	0	0	0	0.001293	0	0	0	0.00161708	0	0	0.00656961	0	0	0	0	0	0	0	0.00231155	0.0018276	0.00225377	0.00187069	0	0	0	0	0.00174061	0.0018525	0	0
Bacteria	Firmicutes	Negativicutes	Selenomonadales	Veillonellaceae	Selenomonas_1	0.00155411	0.00227961	0	0.00159132	0	0	0	0	0.0014448	0	0	0	0	0	0	0	0.00436969	0.00503814	0.00235917	0.00405392	0	0.0010997	0	0	0.00362665	0.00307902	0.00323783	0.00508132	0.00129692	0	0	0
Bacteria	Firmicutes	Negativicutes	Selenomonadales	Veillonellaceae	Anaerovibrio	0	0	0	0.00233631	0	0	0	0	0	0	0	0	0	0.00131546	0.00136327	0	0	0	0	0	0	0.00168097	0	0.00185959	0	0	0	0	0.00241832	0	0	0
Bacteria	Firmicutes	Clostridia	Clostridiales	Ruminococcaceae	Ethanoligenens	0	0	0	0	0	0	0	0	0	0	0	0	0	0	0	0	0	0	0	0	0	0	0	0	0	0	0	0	0	0	0	0
Bacteria	Firmicutes	Clostridia	Clostridiales	Ruminococcaceae	[Eubacterium]_coprostanoligenes_group	0.00555741	0.00355178	0	0	0.00639918	0.00266941	0.00515667	0	0.00477118	0.00607583	0.00136927	0	0.00436263	0.00709233	0.00225464	0	0.00283221	0.0010509	0	0	0.00411095	0.00387514	0.00168009	0	0	0	0.00182792	0.00116753	0	0	0.00176413	0.00346577
Bacteria	Firmicutes	Clostridia	Clostridiales	Ruminococcaceae	Ruminococcaceae_UCG-010	0	0	0.00218493	0.00281776	0.00121288	0	0.00349764	0.000840326	0	0	0.00506631	0.00344939	0	0.00130305	0	0.00113603	0	0.00127963	0.00198539	0.0049657	0	0.00103162	0	0.00144327	0.0051654	0.00164347	0.00469733	0.00115284	0	0	0	0
Bacteria	Firmicutes	Clostridia	Clostridiales	Clostridiaceae_1	Clostridium_sensu_stricto_15	0	0	0	0	0	0	0	0	0	0	0	0	0	0	0	0	0	0	0	0	0	0	0	0	0	0	0	0	0	0	0	0
Bacteria	Firmicutes	Clostridia	Clostridiales	Ruminococcaceae	Ruminococcaceae_UCG-002	0.00181477	0.00220608	0.00245384	0.00401885	0.00108116	0	0.0025313	0.00360846	0	0.00277887	0.00550644	0.00283001	0.00263468	0.00549144	0.00454074	0.00240729	0.00494236	0.00135381	0.0054853	0.00569513	0.00188246	0.00413697	0.0022128	0.00182073	0.00267709	0.00522741	0.0059372	0.00248192	0.00384688	0.00349982	0.00984844	0.00299316
Bacteria	Firmicutes	Clostridia	Clostridiales	Ruminococcaceae	Ruminococcaceae_UCG-013	0	0.00152955	0.00132777	0.00321812	0.0012513	0	0	0.0011122	0.0011616	0.00155428	0	0.00200921	0.00265179	0.00181186	0	0.00133438	0.00148769	0	0	0.00122039	0.00121806	0.00118872	0	0.00165976	0.00152159	0	0	0.00115284	0.00157971	0	0	0
Bacteria	Firmicutes	Clostridia	Clostridiales	Ruminococcaceae	Unknown_Genus	0	0	0	0	0	0	0	0	0	0	0	0	0	0	0	0	0	0	0	0	0	0	0	0	0	0	0	0	0	0	0	0
Bacteria	Firmicutes	Clostridia	Clostridiales	Ruminococcaceae	Ruminiclostridium_1	0	0	0	0	0	0	0	0	0	0	0	0	0	0	0	0	0	0	0	0	0	0	0	0	0	0	0	0	0	0	0	0
Bacteria	Firmicutes	Clostridia	Clostridiales	Ruminococcaceae	Saccharofermentans	0.00116066	0.00120599	0	0	0.00265626	0.00211328	0.00166758	0	0.001224	0	0.000909589	0	0.00260047	0.00160089	0	0	0.000989717	0.00107563	0	0	0.00159178	0.00145056	0	0	0	0	0.00252933	0	0.00212578	0.00226873	0	0
Bacteria	Firmicutes	Clostridia	Clostridiales	Ruminococcaceae	Ruminococcaceae_UCG-005	0	0	0	0	0	0	0	0	0	0	0	0	0	0	0	0	0	0	0	0	0	0	0	0	0.00110401	0	0	0	0	0	0	0
Bacteria	Firmicutes	Clostridia	Clostridiales	Ruminococcaceae	Ruminococcaceae_UCG-004	0	0	0	0	0	0	0	0	0	0	0	0	0	0	0	0	0	0	0	0	0	0	0	0	0	0	0	0	0	0	0	0
Bacteria	Firmicutes	Erysipelotrichia	Erysipelotrichales	Erysipelotrichaceae	Erysipelotrichaceae_UCG-004	0.00188854	0	0	0	0	0	0	0	0.00321119	0	0	0	0	0	0	0	0.00417673	0	0	0	0	0	0	0	0	0	0	0.00282704	0	0	0	0
Bacteria	Firmicutes	Negativicutes	Selenomonadales	Veillonellaceae	Veillonellaceae_UCG-001	0	0.0031694	0.000966411	0.00183965	0.00452772	0	0.00140248	0	0	0.00229217	0.00182896	0.0010474	0.000975176	0.00194217	0.00227561	0.00155076	0	0.00116835	0.00111162	0	0.00350192	0.00278591	0.00159813	0.00145992	0.00200781	0.00152466	0	0.00125564	0.00619695	0	0.00126557	0.00144144
Bacteria	Firmicutes	Clostridia	Halanaerobiales	ODP1230B8.23	uncultured_bacterium	0	0	0	0.00187006	0	0.00365654	0.00452384	0	0	0.00306147	0.00234733	0.00176246	0.00141999	0	0.00111159	0.00376872	0	0	0.00262615	0.00154302	0	0	0.00323724	0.00148212	0.00319191	0.00186128	0.0026852	0	0	0	0.00288397	0.00281987
Bacteria	Firmicutes	Negativicutes	Selenomonadales	Acidaminococcaceae	Acidaminococcus	0	0	0	0	0	0	0	0	0	0	0	0	0	0	0	0	0	0	0	0	0	0	0	0	0	0	0	0	0	0	0	0
Bacteria	Firmicutes	Negativicutes	Selenomonadales	Acidaminococcaceae	Succiniclasticum	0.0300986	0.0226638	0.0272528	0.0160957	0.0429886	0.0188666	0.0305637	0.0227753	0.0223343	0.0310071	0.0298502	0.0164211	0.0272707	0.0376706	0.0300653	0.0217558	0.0217675	0.0260932	0.0286838	0.0186985	0.0264167	0.0445012	0.0166984	0.0144604	0.0226809	0.0296517	0.0220767	0.032096	0.0483518	0.0120764	0.0157544	0.0168484
Bacteria	Cyanobacteria	Melainabacteria	Gastranaerophilales	Unknown_Family	Unknown_Genus	0	0	0	0	0	0	0	0	0	0	0	0	0	0	0	0	0	0	0	0	0	0	0	0	0	0	0	0	0	0	0	0
Bacteria	Cyanobacteria	Melainabacteria	Gastranaerophilales	uncultured_rumen_bacterium	Unknown_Genus	0.00161312	0.00352237	0.00153365	0.00110987	0	0	0	0	0.0015552	0	0.00164313	0	0	0	0	0	0.00120135	0.00280034	0.00322808	0	0	0	0	0	0.00185909	0.0290379	0.00356374	0.0153835	0	0	0	0
Bacteria	Armatimonadetes	uncultured	uncultured_organism	Unknown_Family	Unknown_Genus	0	0	0	0	0	0	0	0	0	0	0	0	0.00126602	0	0	0	0	0	0	0	0	0	0	0	0	0	0	0	0	0	0	0
Bacteria	Armatimonadetes	uncultured	uncultured_bacterium	Unknown_Family	Unknown_Genus	0	0	0	0	0	0	0	0	0	0	0	0	0.00444817	0	0	0	0	0	0	0	0	0	0	0	0	0	0	0	0	0	0	0
Bacteria	Actinobacteria	Coriobacteriia	Coriobacteriales	Coriobacteriaceae	Olsenella	0	0	0	0	0	0	0	0	0	0	0	0	0	0	0	0	0	0	0	0	0	0	0	0	0	0	0	0	0	0	0	0
Bacteria	Actinobacteria	Coriobacteriia	Coriobacteriales	Coriobacteriaceae	Senegalimassilia	0	0	0	0	0	0	0	0	0	0	0	0	0	0	0	0	0	0	0	0	0	0	0	0	0	0	0	0	0	0	0	0
Bacteria	Actinobacteria	Coriobacteriia	Coriobacteriales	Coriobacteriaceae	Denitrobacterium	0.00116558	0.00127217	0.00158828	0	0.00138301	0	0	0.00129756	0	0.00113039	0.00143774	0	0.00133445	0.00130305	0	0.00124422	0	0	0	0	0.00121806	0.00149769	0	0	0.00129278	0	0	0.00101333	0.00366161	0	0	0
Bacteria	Lentisphaerae	Lentisphaeria	Victivallales	vadinBE97	uncultured_rumen_bacterium	0	0.00386799	0.0014118	0.00103385	0.00625099	0.00101493	0	0	0.00148799	0	0.00128125	0	0.00131734	0.00253785	0.00279994	0.00116307	0	0.00137235	0.00193685	0	0.00520444	0.00303203	0.00360604	0	0.0016646	0	0.00114068	0.00272424	0.00115553	0	0.0019252	0.00300892
Bacteria	Lentisphaerae	Lentisphaeria	Victivallales	vadinBE97	Unknown_Genus	0	0.00249287	0.00184458	0.00409994	0	0.0150571	0.00363447	0	0.00331199	0.0265955	0.0148664	0.00317243	0.0103334	0	0.0254931	0.00256958	0.00423898	0	0	0.00262313	0.0105681	0.00190091	0.0161657	0.00505698	0.00169892	0.00536602	0.00569631	0.00481698	0	0.00181733	0.00823771	0.0159425
Bacteria	Proteobacteria	Gammaproteobacteria	Oceanospirillales	Halomonadaceae	Halomonas	0	0	0	0	0	0	0	0	0	0	0	0	0	0	0	0	0	0	0	0	0	0	0	0	0	0	0	0	0	0	0	0
Bacteria	Proteobacteria	Deltaproteobacteria	Desulfovibrionales	Desulfovibrionaceae	Desulfovibrio	0	0	0	0	0	0	0	0	0	0	0	0	0.00111204	0.0012348	0	0	0	0	0	0	0.00137724	0.00103162	0	0	0	0	0	0	0	0.00106109	0	0
Bacteria	Verrucomicrobia	OPB35_soil_group	Unknown_Order	Unknown_Family	Unknown_Genus	0.0186247	0.00986852	0.0103784	0.00464221	0.0297787	0.0112338	0.0113566	0.025148	0.00530398	0.00692362	0.00985877	0.00442126	0.0133103	0.026756	0.00942753	0.0135782	0.00359161	0.00432106	0.00304847	0.00224439	0.00716303	0.0233503	0.00426168	0.00349714	0.00442749	0.00445518	0.00342912	0.00492712	0.0147586	0.00981944	0.00336718	0.0041668
Bacteria	Verrucomicrobia	WCHB1-41	uncultured_rumen_bacterium	Unknown_Family	Unknown_Genus	0.0194116	0.015722	0.0139835	0.0117221	0.00689311	0.00226622	0.00390812	0.00608	0.0127056	0.0207081	0.0120105	0.010323	0.00956357	0.00845743	0.0056733	0.00443591	0.022334	0.0174759	0.0103201	0.0124143	0.0138554	0.00624735	0.00284795	0.00334171	0.0149356	0.0150981	0.00901207	0.0150017	0.00499266	0.00366983	0.00630484	0.00307981
Bacteria	Elusimicrobia	Elusimicrobia	Elusimicrobiales	Elusimicrobiaceae	Elusimicrobium	0	0	0	0	0	0	0	0	0	0	0	0	0	0	0	0	0	0	0.00128638	0	0	0	0	0	0.00441605	0	0	0	0	0	0	0
Bacteria	Synergistetes	Synergistia	Synergistales	Synergistaceae	Pyramidobacter	0.000968859	0	0	0	0	0	0	0	0	0	0	0	0.00764743	0	0	0	0	0	0	0	0	0.00142961	0	0	0	0	0	0	0	0	0	0
Bacteria	Synergistetes	Synergistia	Synergistales	Synergistaceae	Fretibacterium	0	0	0	0	0	0	0	0	0	0	0	0	0	0	0	0	0	0	0	0	0	0	0	0	0	0	0	0	0	0	0	0
Bacteria	Firmicutes	Clostridia	Clostridiales	Ruminococcaceae	Candidatus_Soleaferrea	0	0	0	0	0	0	0	0	0	0	0	0	0	0	0	0	0	0	0	0	0	0	0	0	0	0	0	0	0	0	0	0
Bacteria	Actinobacteria	Actinobacteria	Bifidobacteriales	Bifidobacteriaceae	Bifidobacterium	0	0	0	0	0	0	0	0	0	0	0	0	0	0	0	0	0	0	0	0	0	0	0	0	0	0	0	0	0	0	0	0
Bacteria	Actinobacteria	Coriobacteriia	Coriobacteriales	Coriobacteriaceae	Atopobium	0	0	0	0	0	0	0	0	0	0	0	0	0	0	0	0	0	0	0	0	0	0	0	0	0	0	0	0	0	0	0	0
Bacteria	Firmicutes	Clostridia	Clostridiales	Ruminococcaceae	Ruminococcaceae_UCG-012	0	0	0	0	0	0	0	0	0	0	0	0	0	0	0	0	0	0	0	0	0	0	0	0	0	0	0	0	0	0	0	0
Bacteria	Firmicutes	Clostridia	Clostridiales	Clostridiales_vadinBB60_group	uncultured_Clostridiales_bacterium	0	0	0	0	0	0	0	0	0	0	0	0	0	0	0	0	0	0	0	0	0	0	0	0	0	0	0	0	0	0	0	0
Bacteria	Firmicutes	Clostridia	Clostridiales	Clostridiales_vadinBB60_group	Unknown_Genus	0	0	0	0	0	0	0	0	0	0	0	0	0	0	0	0	0.00156861	0.00146508	0.00157763	0.0022023	0	0	0	0	0.00106397	0.00102964	0	0.00412674	0	0	0	0
Bacteria	Elusimicrobia	Elusimicrobia	Elusimicrobiales	Elusimicrobiaceae	Unknown_Genus	0	0	0	0	0	0	0	0	0	0	0	0	0	0.00169397	0	0	0	0	0	0	0	0	0	0	0	0	0	0	0	0	0	0
Bacteria	Firmicutes	Negativicutes	Selenomonadales	Veillonellaceae	Allisonella	0	0	0	0	0	0	0	0	0	0	0	0	0	0	0	0	0	0	0	0	0	0	0	0	0	0	0	0	0	0	0	0
Bacteria	Firmicutes	Negativicutes	Selenomonadales	Veillonellaceae	Schwartzia	0.00390986	0.0041989	0.00267234	0.00436854	0.00496677	0.00290576	0.00295033	0.00325008	0.00407519	0.00635843	0.00586831	0.00301129	0.00504696	0.00339414	0.00608228	0.00548177	0.00540298	0.00419124	0.00327662	0.00385754	0.00579271	0.00802782	0.00545004	0.00556212	0.00276289	0.00532642	0.00294026	0.00773947	0.0144514	0.00276117	0.00316776	0.00421406
Bacteria	Firmicutes	Negativicutes	Selenomonadales	Veillonellaceae	uncultured	0	0	0	0	0	0	0	0	0	0	0	0	0	0	0	0	0	0	0	0	0	0	0	0	0	0	0	0	0	0	0	0
Bacteria	Tenericutes	Mollicutes	Anaeroplasmatales	Anaeroplasmataceae	Anaeroplasma	0.00739185	0.00305909	0.00262612	0.0040594	0	0	0	0	0.00844317	0.00439595	0.00535973	0.00305157	0	0	0	0	0.00750068	0.00663922	0.00593675	0.00314214	0	0	0	0.00169861	0.00241395	0.002386	0.00137448	0.0103756	0	0	0	0
Bacteria	Spirochaetae	Spirochaetes	Spirochaetales	PL-11B10	Unknown_Genus	0.00312789	0.00250757	0.00210509	0	0	0	0	0.00181659	0.00346559	0	0.0011052	0	0.00193324	0.00118516	0	0	0.00288823	0.00205235	0	0	0.00191014	0.00145579	0	0	0	0	0	0.0022396	0.00265723	0.00145386	0	0
Bacteria	Tenericutes	Mollicutes	Mollicutes_RF9	uncultured_Firmicutes_bacterium	Unknown_Genus	0.00270985	0.00186046	0	0	0.00376487	0	0	0.00318829	0.00351839	0.00155428	0	0	0.0028742	0.00164433	0	0	0.00312477	0.00184835	0	0	0.00336351	0	0	0	0	0	0	0.00140985	0	0	0	0
Bacteria	Firmicutes	Clostridia	Clostridiales	Syntrophomonadaceae	Unknown_Genus	0	0	0	0	0	0	0	0	0	0	0	0	0	0	0	0	0	0	0	0	0	0	0	0	0	0	0	0	0	0	0	0
Bacteria	Firmicutes	Clostridia	Clostridiales	Family_XIII	[Eubacterium]_nodatum_group	0	0	0	0	0	0	0	0	0	0	0	0	0	0	0	0	0	0	0	0	0	0	0	0	0	0	0	0	0	0	0	0
Bacteria	Proteobacteria	Betaproteobacteria	Burkholderiales	Alcaligenaceae	Sutterella	0	0	0	0.00222481	0	0	0	0	0	0	0	0	0	0	0	0	0	0	0	0	0	0	0	0	0	0	0	0	0	0	0	0
Bacteria	Proteobacteria	Gammaproteobacteria	Xanthomonadales	Xanthomonadaceae	Xanthomonas	0	0	0	0	0	0	0	0	0	0	0	0	0	0	0	0	0	0	0	0	0	0	0	0	0	0	0	0	0	0	0	0
Bacteria	Proteobacteria	Gammaproteobacteria	Aeromonadales	Succinivibrionaceae	Ruminobacter	0.00313773	0.0025517	0.00111768	0.00421143	0.00891274	0.00727136	0.00478894	0.00407805	0.00298559	0.00378366	0.00514456	0.0023617	0.0103506	0.0112683	0.0109481	0.00216386	0.00154371	0.0015269	0.00350962	0	0.00723223	0.00960406	0.00477391	0.00580637	0.00185909	0.00172267	0	0.00161545	0.0140955	0.00653066	0.00984844	0.00520653
Bacteria	Proteobacteria	Gammaproteobacteria	Enterobacteriales	Enterobacteriaceae	Unknown_Genus	0	0	0	0	0	0	0	0	0	0	0	0	0	0	0	0	0	0	0	0	0	0	0	0	0	0	0	0	0	0	0	0
Bacteria	Tenericutes	Mollicutes	Anaeroplasmatales	Anaeroplasmataceae	Unknown_Genus	0	0	0	0	0	0	0	0	0	0	0	0	0	0	0	0	0	0	0	0	0	0	0	0	0	0.00157416	0	0	0	0	0	0
Bacteria	Tenericutes	Mollicutes	NB1-n	uncultured_bacterium	Unknown_Genus	0	0	0	0	0	0	0	0	0	0	0	0	0	0	0	0	0	0	0	0	0	0	0	0	0	0	0	0	0	0	0	0
Bacteria	Tenericutes	Mollicutes	Mollicutes_RF9	uncultured_bacterium	Unknown_Genus	0	0	0	0	0	0	0	0	0	0	0	0	0	0	0	0	0	0	0	0	0	0	0	0	0.00105253	0	0	0.00096927	0	0	0	0
Bacteria	Tenericutes	Mollicutes	Mollicutes_RF9	uncultured_rumen_bacterium	Unknown_Genus	0.00179509	0.00138247	0	0	0	0	0.00891941	0.00170537	0.00193439	0	0	0	0	0	0	0	0.00119513	0	0	0	0.00238076	0	0	0	0	0.0024058	0.00852321	0	0	0	0.00113518	0
Bacteria	Tenericutes	Mollicutes	Mollicutes_RF9	uncultured_bacterium	Unknown_Genus	0.00270985	0	0.00301268	0.00304075	0	0	0	0	0.00215999	0.00477275	0	0	0.00537202	0	0	0	0.00364764	0	0.00710662	0.00244077	0.00321125	0	0	0	0	0.00216819	0	0.00283438	0.00119453	0	0	0.0012209
Bacteria	Tenericutes	Mollicutes	Mollicutes_RF9	Unknown_Family	Unknown_Genus	0.0012787	0.0040886	0	0	0	0	0	0	0.00296639	0.00274747	0	0.00192863	0	0.0017374	0	0	0	0.00361634	0	0	0	0.00143485	0	0	0	0	0	0	0	0	0	0.00126816
Bacteria	Firmicutes	Clostridia	Clostridiales	Clostridiales_vadinBB60_group	uncultured_bacterium	0	0	0	0	0	0	0	0	0	0	0	0.00166678	0	0	0	0	0	0	0	0.00123441	0	0	0	0	0	0	0	0	0	0	0	0
Bacteria	Firmicutes	Negativicutes	Selenomonadales	Veillonellaceae	Megasphaera	0	0	0	0	0	0	0	0	0	0	0	0	0.00114626	0	0	0	0	0	0	0	0	0	0	0	0	0	0	0	0	0	0	0
Bacteria	Firmicutes	Clostridia	Clostridiales	Christensenellaceae	Christensenellaceae_R-7_group	0.0104706	0.00623584	0.00738254	0.0291608	0.0077767	0.0124433	0.0110488	0.00672261	0.00622558	0.0202685	0.0164411	0.0174937	0.0151238	0.0136014	0.00882979	0.0108103	0.00960461	0.00619413	0.0144026	0.0262032	0.00934308	0.0103686	0.0132153	0.00597845	0.0121842	0.0168604	0.0314643	0.00706392	0.00464162	0.00721069	0.0145962	0.0149186
Bacteria	Firmicutes	Clostridia	Clostridiales	Clostridiaceae_1	Clostridium_sensu_stricto_12	0	0	0	0	0	0	0	0	0	0	0	0	0	0	0	0	0	0	0	0	0	0	0	0	0	0	0	0	0	0	0	0
Bacteria	Firmicutes	Bacilli	Lactobacillales	Streptococcaceae	Streptococcus	0	0	0	0	0	0	0	0	0	0	0	0	0	0	0	0	0	0	0	0	0	0	0	0	0	0	0	0	0	0	0	0
Bacteria	Firmicutes	Bacilli	Lactobacillales	Leuconostocaceae	Weissella	0	0	0	0	0	0	0	0	0	0	0	0	0.00119758	0	0	0	0	0	0	0	0	0	0	0	0	0	0	0	0	0	0	0
Bacteria	Firmicutes	Bacilli	Lactobacillales	Lactobacillaceae	Lactobacillus	0	0	0	0	0	0	0	0	0	0	0	0	0	0	0	0	0	0	0	0	0	0	0	0	0	0	0	0	0	0	0	0
Bacteria	Firmicutes	Clostridia	Clostridiales	Family_XIII	Family_XIII_UCG-001	0	0	0	0	0	0	0	0	0	0	0	0	0	0	0	0	0	0	0	0	0	0	0	0	0	0	0	0	0	0	0	0
Bacteria	Firmicutes	Clostridia	Clostridiales	Family_XIII	[Eubacterium]_saphenum_group	0	0	0	0	0	0	0	0	0	0	0	0	0.00191614	0	0	0	0	0	0	0	0.00145337	0	0	0	0	0	0	0	0	0	0	0
Bacteria	Firmicutes	Clostridia	Clostridiales	Family_XIII	Mogibacterium	0.00399347	0.0043092	0.00498332	0.00303061	0.00278798	0.00212719	0.00165047	0.00149529	0.00335999	0.00442735	0.00324713	0.00256816	0.00508118	0.00451725	0.00227561	0.00183928	0.00433235	0.00316507	0.00619888	0.00427836	0.00661628	0.00382801	0.00397484	0.00291984	0.00378682	0.00408887	0.00571048	0.00381833	0.00517794	0.00381053	0.00360496	0.00448187
Bacteria	Firmicutes	Clostridia	Clostridiales	Family_XIII	Family_XIII_AD3011_group	0.00278363	0	0.00123953	0.00583823	0.00244771	0.00340628	0.00243723	0.00185366	0.00364799	0.00125599	0.0034134	0.00271419	0.00624455	0.00345619	0.00223366	0.00311055	0.00290068	0.00172471	0.00403388	0.00401184	0.00501066	0.00353475	0.00458951	0.00467396	0.00238535	0.00203948	0.00276314	0.00226897	0.00129205	0.00199906	0.00430294	0.00364693
Bacteria	Firmicutes	Clostridia	Clostridiales	Family_XIII	Anaerovorax	0.00459839	0.00263994	0.00392027	0.00133793	0	0	0	0	0.00391679	0.00312426	0.00297328	0.00104237	0.00104361	0.00112311	0	0	0.00565819	0.00657122	0.00626198	0.00381546	0.00120422	0	0.00106542	0	0.0080999	0.00447498	0.00464774	0.00517678	0	0.0026322	0.00108149	0
Bacteria	Firmicutes	Clostridia	Clostridiales	Family_XIII	Unknown_Genus	0	0	0	0	0	0	0	0	0	0	0	0	0.00111204	0	0	0	0	0	0	0	0	0	0	0	0.00121842	0	0	0.00113816	0	0	0	0
Bacteria	Firmicutes	Clostridia	Clostridiales	Family_XIII	Family_XIII_UCG-002	0.00129837	0.00150013	0	0	0	0	0	0	0.0012336	0.00120889	0	0	0	0	0	0	0.00135075	0	0	0	0	0	0	0	0	0	0	0.00154936	0	0	0	0
Bacteria	Firmicutes	Erysipelotrichia	Erysipelotrichales	Erysipelotrichaceae	Erysipelotrichaceae_UCG-007	0	0	0	0	0	0	0	0	0	0	0	0	0	0	0	0	0	0	0	0	0	0	0	0	0	0	0	0	0	0	0	0
Bacteria	Firmicutes	Erysipelotrichia	Erysipelotrichales	Erysipelotrichaceae	Erysipelotrichaceae_UCG-006	0	0	0	0	0	0	0	0	0	0	0	0	0	0	0	0	0	0	0	0	0	0	0	0	0	0	0	0	0	0	0	0
Bacteria	Firmicutes	Erysipelotrichia	Erysipelotrichales	Erysipelotrichaceae	Erysipelotrichaceae_UCG-009	0	0	0	0	0	0	0	0	0	0	0	0	0	0	0	0	0	0	0	0	0	0	0	0	0	0	0	0	0	0	0	0
Bacteria	Firmicutes	Erysipelotrichia	Erysipelotrichales	Erysipelotrichaceae	uncultured	0	0	0	0	0	0	0	0	0	0.000989089	0	0	0	0.00174361	0	0	0	0	0	0	0	0.00137725	0	0	0	0.00133655	0	0	0	0	0	0

## Sheet: Solid_phase_ET
Supplementary Table S2.
c) All genera present in the solid phase at the early time point
Treatments include different: dry matter (DM) concentrations, i.e. 25 or 35; wilting intensities (WI), i.e. low (LI) or high (HI); and sucrose addition (SA)
Domain	Phylum	Class	Order	Family	Genus	25HISA_a	25HISA_b	25HISA_c	25HISA_d	25HI_a	25HI_b	25HI_c	25HI_d	25LISA_a	25LISA_b	25LISA_c	25LISA_d	25LI_a	25LI_b	25LI_c	25LI_d	35HISA_a	35LISA_b	35HISA_c	35HISA_d	35HI_a	35HI_b	35HI_c	35HI_d	35LISA_a	35LISA_b	35LISA_c	35LISA_d	35LI_a	35LI_b	35LI_c	35LI_d
Archaea	Euryarchaeota	Methanomicrobia	Methanomicrobiales	Methanomicrobiaceae	Methanomicrobium	0.00106522	0	0.00104641	0	0	0	0	0	0	0.00243376	0.00262797	0	0.00164498	0.00135142	0	0	0.00151522	0.00156316	0	0	0.00108841	0.00148477	0.00159251	0	0	0	0	0	0.000979045	0.00119849	0	0
Archaea	Euryarchaeota	Methanobacteria	Methanobacteriales	Methanobacteriaceae	Methanosphaera	0.00243788	0.00188725	0	0.00181478	0	0	0.0024424	0	0	0.00215096	0.00334469	0.00169013	0	0.00392178	0.00216714	0	0.00252864	0.00311543	0	0	0.00232029	0	0	0	0	0	0	0	0.0033485	0.00155181	0	0.0015469
Archaea	Euryarchaeota	Methanobacteria	Methanobacteriales	Methanobacteriaceae	Methanobrevibacter	0.00913232	0.0158802	0.00706737	0.00828964	0.00917314	0.00646023	0.0201244	0.0127947	0.00618519	0.0146111	0.0134722	0.00275983	0.00540862	0.0175332	0.00702209	0.00599707	0.0105573	0.0128593	0.00678551	0.0112442	0.0144214	0.000988327	0.0136494	0.00802607	0.00808806	0.00623784	0.0052363	0.0145833	0.0116663	0.00829246	0.00627412	0.00794822
Archaea	Euryarchaeota	Thermoplasmata	Thermoplasmatales	Thermoplasmatales_Incertae_Sedis	Candidatus_Methanomethylophilus	0	0	0	0	0	0	0	0	0	0	0	0	0	0	0	0	0	0	0	0	0	0	0	0	0	0	0	0	0	0	0	0
Archaea	Euryarchaeota	Thermoplasmata	Thermoplasmatales	Thermoplasmatales_Incertae_Sedis	uncultured	0.00694126	0.00621761	0.00868355	0	0.00228928	0	0.0034516	0.0153023	0.003084	0.00270798	0.0070841	0.00740234	0.00801388	0.00516721	0.00837303	0.00446473	0.0124858	0.00249997	0.00663076	0.0078107	0.0168011	0.00457272	0.00307198	0.00849164	0.0028862	0.0135872	0.00205206	0.00105363	0.0133364	0.00608252	0.0032381	0.0030938
Bacteria	Bacteroidetes	Bacteroidia	Bacteroidales	Prevotellaceae	Unknown_Genus	0.00289688	0.00131808	0	0.00307327	0.00105659	0.00184748	0	0	0.00323877	0.00342783	0.00173467	0.00113388	0.00224354	0.00159874	0.00147056	0.00396865	0.00158901	0.0087145	0.00129758	0	0.00507594	0.00431767	0.00219708	0.0011803	0	0.0013675	0.00201668	0.00237741	0.00472245	0.00268795	0.0023608	0
Bacteria	Bacteroidetes	Bacteroidia	Bacteroidales	Prevotellaceae	Prevotella_1	0.093419	0.0755533	0.047828	0.0250057	0.0506203	0.059626	0.0535606	0.0535679	0.0437492	0.0413739	0.0570675	0.0596466	0.070958	0.0584292	0.0454325	0.0623849	0.0458354	0.13599	0.0531829	0.0508398	0.0423341	0.0416646	0.0611397	0.0281699	0.0432035	0.0552484	0.0520047	0.0878239	0.0337318	0.0526575	0.138696	0.0469973
Bacteria	Bacteroidetes	Bacteroidia	Bacteroidales	Prevotellaceae	Prevotella_7	0	0.0935571	0.0443546	0.247604	0.107436	0.10477	0.114433	0.00304071	0.0581431	0.00901519	0.00458077	0.0385307	0.0143914	0.100085	0.0859608	0.0161061	0.0596199	0	0.108068	0.0627566	0.0206006	0.0884165	0	0.0846869	0.072278	0.103652	0.0627604	0	0.0496763	0.0462078	0.0575267	0.042784
Bacteria	Bacteroidetes	Bacteroidia	Bacteroidales	Prevotellaceae	Prevotellaceae_YAB2003_group	0.0660524	0.0334413	0.0374351	0.0208198	0.0203634	0.0310556	0.0248767	0.0125578	0.030433	0.0298135	0.00701138	0.0185272	0.0348675	0.02853	0.0194268	0.0115862	0.0332069	0.0675919	0.0326002	0.0305501	0.0225944	0.0231414	0.0185007	0.0385763	0.0284369	0.0332441	0.037313	0.0574902	0.0162982	0.0239283	0.0356585	0.0111947
Bacteria	Bacteroidetes	Bacteroidia	Bacteroidales	Prevotellaceae	Prevotella_9	0	0	0	0	0	0	0	0	0	0	0	0	0	0	0	0	0	0	0	0	0	0	0	0	0	0	0	0	0	0	0	0
Bacteria	Bacteroidetes	Bacteroidia	Bacteroidales	Porphyromonadaceae	uncultured	0	0	0	0	0	0	0	0	0	0.00185103	0	0	0	0	0	0	0	0	0	0	0	0	0	0	0	0	0	0	0	0	0	0
Bacteria	Bacteroidetes	Bacteroidia	Bacteroidales	Bacteroidales_S24-7_group	Unknown_Genus	0.00307875	0.00488289	0.00859589	0.00703114	0.0057152	0.00687144	0.00378064	0.0151048	0.00762974	0.00253659	0.0093589	0.00870737	0.00394881	0.00547635	0.00385581	0.0177928	0.00537214	0.00438993	0.0145948	0.00433705	0.0104932	0.00674066	0.0036962	0.0165046	0.00156615	0.0112983	0.00539109	0.00559773	0.0202062	0.0120542	0.00460825	0.00687964
Bacteria	Bacteroidetes	Bacteroidia	Bacteroidales	Bacteroidales_BS11_gut_group	uncultured_rumen_bacterium	0.00345547	0.00486624	0	0.00205189	0.00222525	0.00308112	0.00700037	0.00144138	0.0068788	0.013917	0.00304346	0.0039579	0.00682536	0.0107584	0	0.00460804	0.0160623	0.00297382	0	0	0.00714886	0.0076379	0.00754478	0	0	0	0.00379455	0.00321491	0.00711659	0.00194668	0.00421889	0.00255442
Bacteria	Bacteroidetes	Bacteroidia	Bacteroidales	Rikenellaceae	Unknown_Genus	0	0	0	0	0	0	0	0.00217194	0	0	0	0	0	0	0	0	0	0	0	0	0	0	0	0	0	0	0	0	0	0	0	0
Bacteria	Bacteroidetes	Bacteroidia	Bacteroidales	Bacteroidales_BS11_gut_group	Unknown_Genus	0.0215253	0.013933	0.0155427	0.0152478	0.0115585	0.0109359	0.011523	0.0362121	0.0154773	0.0417681	0.0256876	0.0244534	0.0318445	0.0212871	0.0142975	0.014243	0.0202046	0.0222329	0.0290349	0.0159527	0.0151437	0.0170839	0.0264878	0.00878015	0.012216	0.0191889	0.0135418	0.0176415	0.0139864	0.0202289	0.00991636	0.0140748
Bacteria	Bacteroidetes	Bacteroidia	Bacteroidales	Bacteroidales_BS11_gut_group	uncultured_bacterium	0.00140297	0	0	0	0	0	0.0012742	0.00298148	0	0.00456758	0	0	0.00146412	0.0011571	0	0	0.00187926	0.00151414	0	0.00141556	0.00252808	0	0.00173997	0.00321961	0	0	0	0.00306903	0.00153027	0	0	0
Bacteria	Bacteroidetes	Bacteroidia	Bacteroidales	Marinilabiaceae	uncultured	0	0	0	0	0	0	0	0.0017573	0	0	0	0	0	0	0	0	0	0	0	0	0	0	0	0	0	0	0	0	0	0	0	0
Bacteria	Bacteroidetes	Bacteroidetes_BD2-2	Unknown_Order	Unknown_Family	Unknown_Genus	0	0.0020337	0.00123816	0.00301856	0.001793	0	0.00107324	0.00203372	0.00108341	0.00111404	0.00224364	0.00479226	0.00111962	0.0012366	0.00289186	0	0.00153982	0.000991275	0.0012083	0.00151596	0.00104388	0	0.00149421	0.00260978	0.00137598	0.00230354	0	0.00144806	0.00199923	0.00160723	0	0.00195398
Bacteria	Bacteroidetes	Bacteroidia	Bacteroidales	PeH15	uncultured_rumen_bacterium	0	0.00196381	0.00341316	0	0	0.0018296	0.00379389	0	0.00309546	0	0.00283571	0	0	0.00377162	0	0.00164258	0.0023171	0	0	0	0.00508089	0.00304241	0	0	0	0	0.00125158	0	0.00361177	0.00174578	0.00171023	0
Bacteria	Bacteroidetes	Bacteroidia	Bacteroidales	Bacteroidales_S24-7_group	uncultured_bacterium	0.00899376	0.0480533	0.0411058	0.00896448	0.00387417	0.0143567	0.112468	0.0258263	0.0278763	0.0049275	0.0230701	0.00962732	0.00639905	0.0754677	0.00935106	0.0282876	0.0305405	0.00381259	0.0231898	0.0219964	0.0576708	0.0375655	0.00376993	0.0183275	0.00799857	0.0317962	0.0167836	0.00467378	0.053831	0.0446144	0.0141698	0.00846724
Bacteria	Bacteroidetes	Bacteroidia	Bacteroidales	Bacteroidales_S24-7_group	uncultured_rumen_bacterium	0.0249071	0.00108176	0	0	0	0	0	0.00343561	0	0.0255716	0.00237868	0	0.0742996	0	0	0.00141107	0	0.00473851	0.00124401	0	0.00116756	0	0.0365098	0.00144915	0	0	0	0.0259733	0.00232832	0	0	0
Bacteria	Bacteroidetes	Bacteroidia	Bacteroidales	Rikenellaceae	SP3-e08	0	0	0	0	0	0	0	0	0	0	0	0	0	0	0	0	0	0	0	0	0	0	0	0	0	0	0	0	0	0	0	0
Bacteria	Bacteroidetes	Bacteroidia	Bacteroidales	Rikenellaceae	Rikenellaceae_RC9_gut_group	0.0383609	0.0314875	0.0351013	0.0203912	0.0203794	0.0233438	0.0196938	0.0436955	0.0397881	0.0157423	0.0712564	0.0337384	0.0483288	0.029749	0.0231279	0.0364785	0.0366407	0.0230934	0.0284694	0.0298172	0.027888	0.038194	0.0519189	0.021134	0.0293654	0.0306334	0.0312984	0.040643	0.0257925	0.026831	0.0313016	0.026165
Bacteria	Bacteroidetes	Bacteroidia	Bacteroidales	Prevotellaceae	Prevotellaceae_UCG-001	0.00192692	0.00131475	0.00229553	0.00176007	0	0.00377244	0.00132058	0.00918138	0.00318718	0.00346211	0.00290843	0.00331607	0.00305742	0.00151925	0.00152685	0.00331823	0.00364538	0.00373634	0.00413678	0.00269057	0.00310691	0.00295132	0.00226098	0.00386878	0.00383708	0.00408056	0.00189285	0.00286911	0.00417945	0.00344307	0.00277974	0.00201504
Bacteria	Bacteroidetes	Bacteroidia	Bacteroidales	Prevotellaceae	Prevotellaceae_Ga6A1_group	0.043817	0.0268043	0.0295679	0.0258721	0.0265909	0.0155844	0.0115937	0.0245627	0.0265006	0.0219809	0.049651	0.0132857	0.0240976	0.0136202	0.0166687	0.0277585	0.0344614	0.0333439	0.0385286	0.0386117	0.0192945	0.0275456	0.0346814	0.016957	0.0430245	0.0372223	0.0368929	0.0478185	0.01991	0.0202427	0.0257372	0.017138
Bacteria	Bacteroidetes	Bacteroidia	Bacteroidales	Prevotellaceae	Prevotellaceae_UCG-004	0	0	0.00314471	0	0	0	0.00263894	0.00341587	0	0	0.00756191	0.00177571	0.00196364	0.00576784	0	0	0.0032715	0	0.00124996	0.00106418	0.0027507	0	0.00204962	0	0	0.00195253	0	0	0.00209795	0.00349156	0	0
Bacteria	Bacteroidetes	Bacteroidia	Bacteroidales	Bacteroidales_Incertae_Sedis	Phocaeicola	0	0	0	0	0	0	0	0	0	0.00192815	0.00391599	0	0	0	0	0	0	0.00116556	0	0	0	0	0	0	0	0	0	0	0	0	0	0
Bacteria	Bacteroidetes	Bacteroidia	Bacteroidales	Bacteroidales_UCG-001	Unknown_Genus	0	0	0	0	0	0	0	0	0	0	0	0	0	0	0	0	0	0	0	0	0	0	0	0	0	0	0	0	0	0	0	0
Bacteria	Bacteroidetes	Bacteroidia	Bacteroidales	Bacteroidales_UCG-001	uncultured_rumen_bacterium	0	0	0	0	0	0	0	0	0	0	0.00127763	0.00205383	0	0	0	0	0	0	0	0	0	0	0	0.00232127	0	0	0	0	0	0	0	0
Bacteria	Bacteroidetes	Bacteroidia	Bacteroidales	Prevotellaceae	Prevotellaceae_UCG-003	0.00175805	0	0	0	0	0	0	0.00110571	0.00168531	0.00279368	0	0	0	0	0	0	0	0	0	0	0	0	0	0	0	0	0	0	0	0	0	0
Bacteria	Bacteroidetes	Bacteroidia	Bacteroidales	Bacteroidales_RF16_group	Unknown_Genus	0	0	0	0	0	0	0	0	0	0	0	0	0	0	0	0	0	0	0	0	0	0	0	0	0	0	0	0	0	0	0	0
Bacteria	Bacteroidetes	Bacteroidia	Bacteroidales	Porphyromonadaceae	Unknown_Genus	0	0	0	0	0	0	0	0.00197449	0	0	0.00256565	0	0	0	0	0	0	0	0	0	0	0	0	0	0	0	0	0	0	0	0	0
Bacteria	Bacteroidetes	Bacteroidia	Bacteroidales	Unknown_Family	Unknown_Genus	0.00235561	0	0.00272833	0.00126761	0.00166493	0.00167465	0	0.00304071	0.00274579	0.000934083	0.0170974	0.00113388	0.00112823	0	0.00256116	0.0014221	0.00290745	0.000985828	0.00367846	0.00426677	0.0032207	0	0.00148438	0.00333764	0.00271839	0.00277156	0.00209629	0.00128056	0.00309345	0.0028265	0.0013948	0.00134336
Bacteria	Spirochaetae	Spirochaetes	Spirochaetales	Spirochaetaceae	Unknown_Genus	0	0.00103849	0	0.00152296	0.0019691	0.00153162	0	0.00106622	0.00464319	0	0.00666861	0.00211801	0	0	0.00230786	0.00235914	0	0	0.00191066	0.00426677	0	0.00168517	0.00134184	0.00287207	0.00594019	0.00126512	0.00366629	0	0	0.0023	0.00180387	0.00650309
Bacteria	Spirochaetae	Spirochaetes	Spirochaetales	Spirochaetaceae	Treponema_2	0.148455	0.126872	0.123323	0.191966	0.201089	0.149229	0.113806	0.0843305	0.158843	0.0851644	0.20225	0.123551	0.135551	0.08491	0.299121	0.173584	0.142381	0.126093	0.132567	0.149528	0.128393	0.170575	0.175078	0.237215	0.223512	0.142037	0.204782	0.18754	0.110369	0.125994	0.161644	0.186147
Bacteria	SR1_(Absconditabacteria)	uncultured_bacterium	Unknown_Order	Unknown_Family	Unknown_Genus	0	0	0	0	0	0	0	0	0	0	0	0	0	0	0	0	0	0	0	0	0	0	0	0	0	0	0	0	0	0	0	0
Bacteria	SR1_(Absconditabacteria)	uncultured_rumen_bacterium	Unknown_Order	Unknown_Family	Unknown_Genus	0	0	0	0	0	0	0	0	0	0	0	0	0	0	0	0	0	0	0	0	0	0	0	0	0	0	0	0	0	0	0	0
Bacteria	Cyanobacteria	Melainabacteria	Gastranaerophilales	uncultured_bacterium	Unknown_Genus	0	0	0	0	0	0	0	0	0	0	0	0	0	0	0	0	0	0	0	0	0	0	0	0	0	0	0	0	0	0	0	0
Bacteria	Chloroflexi	Anaerolineae	Anaerolineales	Anaerolineaceae	uncultured	0	0	0	0	0	0	0	0	0	0	0	0	0	0	0	0	0	0	0	0	0	0	0	0	0	0	0	0	0	0	0	0
Bacteria	Elusimicrobia	Elusimicrobia	Lineage_I	Unknown_Family	Candidatus_Endomicrobium	0.00181434	0.00112503	0	0	0	0	0	0	0	0.00121688	0	0	0.00139091	0	0	0	0.00149062	0.00217318	0.00157733	0	0	0	0.000943712	0	0	0.00139675	0	0.00272862	0	0	0	0
Bacteria	Elusimicrobia	Elusimicrobia	Lineage_IV	uncultured_bacterium	Unknown_Genus	0	0	0	0	0	0	0	0	0	0	0	0	0	0	0	0	0	0	0	0	0	0	0	0	0	0	0	0	0	0	0	0
Bacteria	Elusimicrobia	Elusimicrobia	Lineage_IV	uncultured_bacterium	Unknown_Genus	0	0	0	0	0	0	0	0	0	0	0	0	0	0	0	0	0	0	0	0	0	0	0	0	0	0	0	0	0	0	0	0
Bacteria	Planctomycetes	Planctomycetacia	Planctomycetales	Planctomycetaceae	CPla-4_termite_group	0.00138565	0	0.00110119	0.00130409	0	0	0	0	0	0	0	0	0	0	0	0	0	0	0	0	0	0	0.0011993	0.00180324	0	0.00163076	0	0	0	0.00182199	0	0.00100752
Bacteria	Planctomycetes	Planctomycetacia	Planctomycetales	Planctomycetaceae	p-1088-a5_gut_group	0	0	0	0	0	0	0	0.00171781	0	0.00196243	0	0	0	0	0	0	0	0	0	0	0	0	0	0	0	0	0	0	0	0	0	0
Bacteria	Lentisphaerae	Oligosphaeria	Oligosphaerales	Oligosphaeraceae	horsej-a03	0	0	0	0	0	0	0	0	0	0.000916944	0	0	0	0	0	0	0	0	0	0	0	0	0	0	0	0	0	0	0	0	0	0
Bacteria	Firmicutes	Erysipelotrichia	Erysipelotrichales	Erysipelotrichaceae	Kandleria	0.00227334	0	0	0.00139529	0.00216121	0	0	0.00161908	0.00111207	0.0035478	0	0.00374396	0.00165359	0	0.00104839	0	0	0.00169388	0	0.00249982	0	0	0.00159743	0	0.00401606	0	0	0	0	0	0	0
Bacteria	Firmicutes	Erysipelotrichia	Erysipelotrichales	Erysipelotrichaceae	Erysipelotrichaceae_UCG-002	0	0	0	0	0	0	0	0	0	0	0	0	0	0	0.00169571	0	0	0	0	0	0	0	0.00395671	0	0	0	0	0	0	0	0	0
Bacteria	Firmicutes	Clostridia	Halanaerobiales	ODP1230B8.23	Unknown_Genus	0	0	0	0	0	0	0	0	0	0	0	0	0	0	0	0	0	0	0	0	0	0	0	0	0	0	0	0	0	0	0	0
Bacteria	Fibrobacteres	Fibrobacteria	Fibrobacterales	Fibrobacteraceae	Fibrobacter	0.0490824	0.0412932	0.0681536	0.054562	0.0435444	0.0852821	0.0295208	0.0666588	0.0879799	0.0330957	0.0831394	0.0576141	0.031444	0.0512039	0.0448203	0.100837	0.053682	0.0497925	0.066998	0.133545	0.0313857	0.0265755	0.0473625	0.080641	0.0566836	0.0551314	0.0580725	0.0784655	0.0292562	0.0514867	0.0216366	0.038011
Bacteria	Verrucomicrobia	Opitutae	Opitutae_vadinHA64	uncultured_bacterium	Unknown_Genus	0	0	0	0	0	0	0	0	0	0	0	0	0	0	0	0	0	0	0	0	0	0	0	0	0	0	0	0	0	0	0	0
Bacteria	Proteobacteria	Epsilonproteobacteria	Campylobacterales	Campylobacteraceae	Campylobacter	0	0	0	0	0	0	0	0	0	0	0	0	0	0	0	0	0	0	0	0	0	0	0	0	0	0	0	0	0	0	0	0
Bacteria	Synergistetes	Synergistia	Synergistales	Synergistaceae	Synergistes	0	0	0	0	0	0	0	0	0	0	0.00493394	0	0	0	0	0	0	0	0	0	0	0.00106575	0	0	0	0	0	0	0.00130814	0.00163494	0	0
Bacteria	Proteobacteria	Gammaproteobacteria	Aeromonadales	Succinivibrionaceae	Anaerobiospirillum	0	0	0	0	0	0	0	0	0	0	0	0	0	0	0	0	0	0	0	0	0	0	0	0	0	0	0	0	0	0	0	0
Bacteria	Proteobacteria	Gammaproteobacteria	Aeromonadales	Succinivibrionaceae	Succinivibrio	0.00238159	0.00312545	0.0157181	0	0.00296166	0.00769983	0.00544351	0.0253919	0.00443683	0.00463614	0.00514168	0.00562663	0.00404785	0.00489339	0	0.0141107	0.00191862	0	0.0340645	0.0055217	0.0072577	0.00914544	0.00232979	0.00445893	0.00441879	0.0112252	0.00827016	0.00146967	0.00592363	0.0134952	0.00757527	0.00555663
Bacteria	Firmicutes	Clostridia	Clostridiales	Lachnospiraceae	Oribacterium	0.0188795	0.0326192	0.021865	0.00609183	0.0127912	0.00835538	0.0143408	0.0100896	0.0264146	0.0385459	0	0.00973429	0.0141804	0.00807321	0.020039	0.013328	0.0227283	0.0265411	0.0199042	0.0164346	0.00865779	0.0112861	0.00566718	0.0100982	0.0294101	0.0204905	0.0258409	0.0257193	0.0126206	0.0111328	0.0146281	0.00356194
Bacteria	Firmicutes	Clostridia	Clostridiales	Lachnospiraceae	Lachnospiraceae_NK4A136_group	0.0137136	0.0105979	0.00957108	0.0163057	0.0194669	0.0380581	0.0194685	0.0333294	0.0169219	0.026977	0.0312136	0.0434727	0.0254541	0.0183546	0.00862633	0.0360155	0.00812216	0.00604569	0.00733907	0.0164747	0.0260328	0.0467155	0.0278149	0.0148522	0.0089047	0.0132508	0.0130686	0.00861813	0.0317902	0.0189542	0.0386107	0.0323628
Bacteria	Firmicutes	Clostridia	Clostridiales	Lachnospiraceae	Lachnospiraceae_UCG-009	0	0	0	0	0	0	0	0.00169806	0	0	0.00101795	0	0	0	0	0	0	0	0	0	0.00113293	0	0	0.00322617	0	0	0	0	0.00107777	0	0	0
Bacteria	Firmicutes	Clostridia	Clostridiales	Lachnospiraceae	Lachnospiraceae_FCS020_group	0	0.00209029	0.00438834	0	0	0	0.00350019	0.00529163	0	0.00491036	0	0	0.00251914	0.00215521	0	0	0	0	0.00408321	0.00199785	0.00130114	0	0	0.0011803	0	0.00212072	0	0.00185871	0.00198277	0.0024247	0	0
Bacteria	Firmicutes	Clostridia	Clostridiales	Lachnospiraceae	Unknown_Genus	0.0212438	0.0136135	0.0134992	0.0145912	0.0145682	0.0284393	0.0291697	0.0489673	0.016297	0.0330185	0.0343714	0.0348723	0.0404871	0.0345629	0.00921033	0.0223347	0.0167904	0.0137635	0.0120889	0.0145572	0.0291842	0.0192974	0.0220494	0.0252257	0.00858028	0.0165636	0.012989	0.00744023	0.0356899	0.0292003	0.0157223	0.0214225
Bacteria	Firmicutes	Clostridia	Clostridiales	Lachnospiraceae	[Eubacterium]_cellulosolvens_group	0	0.00140795	0.001534	0	0	0.00184748	0.00348914	0.00219168	0.00181142	0.00158537	0	0.00209662	0	0.00171357	0	0.00203944	0.00180055	0	0	0	0	0.00158952	0	0.00375075	0.00457541	0.00128706	0	0.00137242	0.00191695	0	0.00213409	0.00157743
Bacteria	Firmicutes	Clostridia	Clostridiales	Lachnospiraceae	Syntrophococcus	0.00224736	0.00426712	0.00336385	0.00193334	0.00350596	0.00417769	0.00855945	0.00387	0.0020751	0.00531313	0	0.00406487	0.00301866	0.00455774	0.00306777	0.00168667	0.00227775	0.00295204	0.00316062	0.00245967	0.0027606	0.00260973	0.00206437	0.00241962	0.00363571	0.0031372	0.00249874	0.00204242	0.00311814	0.00343614	0.00281424	0.00387743
Bacteria	Firmicutes	Clostridia	Clostridiales	Lachnospiraceae	Coprococcus_1	0	0	0	0	0	0	0	0	0	0.00144826	0	0	0	0	0	0	0	0	0	0	0	0	0	0	0	0	0	0	0	0	0	0
Bacteria	Firmicutes	Clostridia	Clostridiales	Lachnospiraceae	Roseburia	0.0260719	0.0214721	0.0191148	0.0217865	0.0301609	0.0329328	0.0200427	0.0431426	0.0213873	0.0509975	0.0282637	0.028668	0.0282531	0.0170032	0.0106316	0.0276703	0.0150784	0.0161109	0.0145115	0.0306304	0.0194182	0.0295678	0.0305379	0.0201898	0.0260429	0.0209074	0.0154878	0.0160692	0.0296017	0.0249328	0.0253676	0.0390592
Bacteria	Firmicutes	Clostridia	Clostridiales	Lachnospiraceae	Pseudobutyrivibrio	0.0218847	0.019202	0.0166275	0.020756	0.0277275	0.0177656	0.0117814	0.0245232	0.0174206	0.0403284	0.0319823	0.0310214	0.0182799	0.0152985	0.0188499	0.0145738	0.017548	0.0183386	0.0140115	0.0205508	0.0218572	0.0262294	0.0342833	0.0109572	0.0188498	0.0216313	0.01727	0.0221478	0.0292562	0.0193421	0.0212029	0.0282208
Bacteria	Firmicutes	Clostridia	Clostridiales	Lachnospiraceae	[Eubacterium]_oxidoreducens_group	0.0026847	0.00172416	0.00249276	0.00216132	0.00220924	0.00323607	0.00171366	0.00331714	0.00178276	0.00519316	0.00263836	0.00310213	0.00312201	0.00219937	0.00232193	0.00331823	0.00283366	0.00157406	0.00527365	0.00326282	0.00238955	0.00364816	0.00348485	0.00121965	0.00385945	0.00325421	0.00312674	0.00359314	0.0033485	0.0032768	0.00244952	0.00340929
Bacteria	Firmicutes	Clostridia	Clostridiales	Lachnospiraceae	uncultured	0	0	0	0	0.00180901	0	0	0.00144138	0	0.00370205	0	0.00346583	0	0.00240253	0.00163942	0.00250245	0.00242533	0	0.00471415	0	0	0	0	0	0.00205837	0.00239861	0	0.00209645	0.00206505	0	0	0
Bacteria	Firmicutes	Clostridia	Clostridiales	Lachnospiraceae	Lachnospiraceae_UCG-001	0	0	0	0	0	0	0	0	0	0	0	0	0	0.00430159	0	0.00230402	0	0	0	0	0.00274081	0.00141645	0.00173014	0	0	0	0	0	0	0	0.00234602	0
Bacteria	Firmicutes	Clostridia	Clostridiales	Lachnospiraceae	Anaerostipes	0	0	0	0	0	0	0	0	0	0	0	0	0	0.00136026	0	0	0	0	0	0	0	0	0	0	0	0	0	0	0.00157964	0	0	0
Bacteria	Firmicutes	Clostridia	Clostridiales	Lachnospiraceae	Coprococcus_2	0	0	0	0	0	0	0.00367906	0	0	0	0.0014646	0	0	0	0	0	0	0	0	0	0.000935042	0	0	0	0	0	0	0	0.000929682	0	0	0
Bacteria	Firmicutes	Clostridia	Clostridiales	Lachnospiraceae	[Eubacterium]_ruminantium_group	0	0.00384107	0.0183204	0.00559938	0.00550708	0.0111087	0.00776224	0.0176717	0.00478077	0.00150824	0.00709448	0.0176929	0.00189474	0.0109439	0	0.00698923	0.00169724	0	0.0119461	0.0107523	0.00756444	0.00950069	0.00198573	0.0103736	0.00224855	0.0340193	0.00795616	0	0.0101689	0.0252168	0.0160377	0.0063199
Bacteria	Firmicutes	Clostridia	Clostridiales	Lachnospiraceae	Lachnoclostridium_10	0.00129905	0	0	0	0	0	0	0.00171781	0	0	0	0.00218219	0	0	0	0	0	0	0	0.00225888	0	0	0.00165641	0	0	0	0	0.00132919	0	0	0	0.00120088
Bacteria	Firmicutes	Clostridia	Clostridiales	Lachnospiraceae	Lachnospiraceae_UCG-006	0	0	0	0	0	0	0	0	0	0.00101978	0	0	0	0	0	0	0	0	0	0	0	0	0	0	0	0	0	0	0	0	0	0
Bacteria	Firmicutes	Clostridia	Clostridiales	Lachnospiraceae	[Eubacterium]_ventriosum_group	0	0	0	0	0	0	0	0	0	0.00152538	0	0	0	0	0	0	0	0	0	0	0	0	0	0	0	0	0	0.00124814	0	0	0	0
Bacteria	Firmicutes	Clostridia	Clostridiales	Lachnospiraceae	[Bacteroides]_pectinophilus_group	0	0	0	0	0	0.0015495	0	0	0	0	0	0	0	0	0	0.00203944	0	0	0.00147019	0	0	0.00199032	0	0	0	0	0.00147713	0	0	0	0.00116808	0
Bacteria	Firmicutes	Clostridia	Clostridiales	Lachnospiraceae	Lachnoclostridium_1	0.00534776	0.006404	0.00537997	0.00421321	0.00702794	0.00535174	0.00478764	0.00430439	0.00745777	0.0105234	0.00351089	0.00564803	0.00592106	0.00543219	0.00626922	0.00500491	0.00771876	0.00796832	0.0056784	0.00616422	0.00470984	0.0066769	0.00344553	0.00590152	0.00799857	0	0.0069036	0.0070674	0.00734695	0.00528584	0.00917214	0.00603495
Bacteria	Firmicutes	Clostridia	Clostridiales	Lachnospiraceae	Butyrivibrio_2	0.0796058	0.0619964	0.0691287	0.079285	0.0880173	0.0674748	0.0710505	0.065948	0.104753	0.0459243	0.0329068	0.0707287	0.0949049	0.0580494	0.0582312	0.0858	0.0799278	0.0729131	0.0504628	0.0700051	0.101791	0.079681	0.0787901	0.0746215	0.101733	0.0376538	0.066807	0.0775686	0.0973122	0.0743273	0.0921748	0.0829525
Bacteria	Firmicutes	Clostridia	Clostridiales	Lachnospiraceae	[Ruminococcus]_gauvreauii_group	0	0	0	0.00583649	0.00931722	0.00424921	0	0	0.00355978	0	0.0011426	0	0.00331579	0	0	0.00249143	0	0	0	0	0	0.00312894	0	0	0	0	0.00249432	0	0	0	0.00317402	0.00643185
Bacteria	Firmicutes	Clostridia	Clostridiales	Lachnospiraceae	uncultured_bacterium	0	0	0	0	0	0	0	0.00134265	0	0	0	0.00121946	0	0	0	0	0	0	0	0	0	0	0	0	0	0	0	0	0	0	0	0
Bacteria	Firmicutes	Clostridia	Clostridiales	Lachnospiraceae	Moryella	0.00129905	0.00182401	0	0	0	0	0	0	0	0.00136256	0	0	0	0	0	0	0.00162345	0.00181915	0	0	0.0016524	0	0.00147455	0	0	0	0	0.00146967	0.00165368	0	0	0
Bacteria	Firmicutes	Clostridia	Clostridiales	Lachnospiraceae	Lachnospira	0.0058414	0.0391663	0.0805132	0.00744152	0.0135916	0.0288445	0.0446412	0.0172965	0.00618519	0.00747266	0.0108858	0.0189979	0.0123459	0.0362764	0.00477755	0.016503	0.0222462	0.00460235	0.0392191	0.0110434	0.0625192	0.0109855	0.00996304	0.0560514	0.00663378	0.0515116	0.0110696	0.00394975	0.0514287	0.0714246	0.0271172	0.010869
Bacteria	Firmicutes	Clostridia	Clostridiales	Lachnospiraceae	[Eubacterium]_eligens_group	0.00106522	0.0021269	0	0.00321007	0.00677179	0	0.00140891	0	0	0.00496178	0.00296036	0.03008	0	0	0.00375027	0.00187408	0	0	0	0	0	0	0	0.00686544	0	0	0	0	0	0	0	0.00538362
Bacteria	Firmicutes	Clostridia	Clostridiales	Lachnospiraceae	Lachnospiraceae_NK3A20_group	0.0285661	0.0637305	0.0294364	0.0161233	0.0251341	0.0158287	0.0410681	0.0114915	0.0307138	0.0214668	0.00434187	0.0240255	0.0165747	0.0172682	0.0237752	0.0166683	0.050199	0.0369386	0.0346894	0.0205206	0.0171424	0.0148067	0.0111869	0.0128129	0.0324194	0.0120442	0.0347126	0.0302364	0.0218352	0.0171114	0.0145295	0.0163442
Bacteria	Firmicutes	Clostridia	Clostridiales	Lachnospiraceae	Shuttleworthia	0.001364	0.0120558	0.00267903	0.00171447	0.00185704	0.0209838	0.00767612	0	0.0239784	0.00380489	0	0.00348723	0.00434498	0.00364796	0.00126651	0.0249033	0.010759	0.0033224	0.00545222	0.00123485	0.00299807	0.00173982	0.0135167	0.00305568	0.00266246	0.00560163	0.0263186	0.0219371	0.00533127	0.00190512	0.0276298	0
Bacteria	Firmicutes	Clostridia	Clostridiales	Lachnospiraceae	Lachnospiraceae_UCG-008	0	0	0	0	0	0	0	0	0	0	0	0	0	0	0	0	0	0	0	0	0	0	0	0	0	0	0	0	0.00139864	0	0	0
Bacteria	Firmicutes	Clostridia	Clostridiales	Lachnospiraceae	probable_genus_10	0.00250284	0	0	0	0	0	0	0.00489673	0	0	0	0.00350862	0.00282488	0.00364796	0	0	0	0	0	0.00255002	0.0057933	0	0.00266893	0.00672118	0	0	0	0	0.00647486	0.00187048	0	0
Bacteria	Firmicutes	Clostridia	Clostridiales	Unknown_Family	Unknown_Genus	0	0	0	0	0	0	0	0.00132291	0	0	0	0	0	0	0	0	0	0	0	0	0	0	0	0	0	0	0	0	0	0	0	0
Bacteria	Firmicutes	Clostridia	Clostridiales	Lachnospiraceae	Lachnospiraceae_ND3007_group	0	0	0	0	0	0	0	0	0	0	0	0	0	0	0	0	0	0	0	0	0	0	0	0	0	0	0	0	0	0	0	0
Bacteria	Firmicutes	Clostridia	Clostridiales	Lachnospiraceae	Lachnospiraceae_AC2044_group	0	0	0	0	0	0	0.0012742	0.00217194	0	0.00150824	0.00153731	0.00348723	0.00112393	0	0	0	0	0	0	0	0	0	0.00251656	0	0	0	0	0	0.00189227	0	0	0
Bacteria	Firmicutes	Clostridia	Clostridiales	Ruminococcaceae	Ruminococcaceae_UCG-014	0	0	0	0	0	0.00131112	0	0.00112546	0	0	0	0	0.00136507	0	0	0.00140005	0.00135779	0	0	0	0	0	0	0	0.00123055	0	0.00205648	0.00224774	0	0	0	0
Bacteria	Tenericutes	Unknown_Class	Unknown_Order	Unknown_Family	Unknown_Genus	0	0	0	0	0	0	0	0	0	0	0	0	0	0	0	0	0	0	0	0	0	0	0	0	0	0	0	0	0	0	0	0
Bacteria	Firmicutes	Clostridia	Clostridiales	Ruminococcaceae	Ruminiclostridium_6	0	0	0	0	0	0	0	0	0	0	0.0118726	0	0	0	0	0	0	0	0	0	0	0	0.000973203	0	0	0	0	0	0	0	0	0
Bacteria	Firmicutes	Clostridia	Clostridiales	Ruminococcaceae	Ruminococcus_2	0	0	0	0	0	0	0	0	0	0	0	0	0	0	0	0	0	0	0	0	0	0	0	0	0	0	0	0	0	0	0	0
Bacteria	Firmicutes	Clostridia	Clostridiales	Ruminococcaceae	uncultured	0	0	0	0	0	0	0	0	0	0	0.00136073	0	0	0	0	0	0	0	0	0	0	0	0	0	0	0	0	0	0	0	0	0
Bacteria	Firmicutes	Clostridia	Clostridiales	Ruminococcaceae	Ruminococcus_1	0.0224519	0.0277695	0.0400265	0.0480689	0.0503802	0.0303345	0.0272816	0.0420961	0.0287534	0.0283567	0.0578361	0.0679261	0.0317196	0.02346	0.02666	0.0338878	0.0295369	0.0206697	0.0344335	0.016806	0.0370455	0.0340358	0.0459322	0.0225897	0.0203936	0.0412882	0.0233068	0.026827	0.0419344	0.0571535	0.0283839	0.0789733
Bacteria	Firmicutes	Clostridia	Clostridiales	Clostridiaceae_1	Clostridium_sensu_stricto_1	0	0.00566841	0	0	0	0	0	0	0	0	0	0	0	0	0	0	0	0	0	0	0	0	0	0	0	0	0	0	0	0	0	0
Bacteria	Firmicutes	Clostridia	Clostridiales	Lachnospiraceae	Tyzzerella_3	0	0	0	0	0	0	0	0	0	0	0	0	0	0	0	0	0	0	0	0	0	0	0	0	0	0	0	0	0	0	0	0
Bacteria	Firmicutes	Clostridia	Clostridiales	Lachnospiraceae	[Eubacterium]_hallii_group	0	0	0	0	0	0	0	0	0	0	0	0	0	0	0	0	0	0	0	0	0	0	0	0	0	0	0	0	0	0	0	0
Bacteria	Firmicutes	Clostridia	Clostridiales	Ruminococcaceae	Ruminococcaceae_NK4A214_group	0.00526548	0.00607781	0.00519917	0.00371164	0.00385816	0.00363537	0.00481414	0.00645658	0.00410435	0.00769547	0.00404063	0.00750931	0.00605455	0.00487572	0.00329996	0.00372612	0.00615435	0.00510343	0.00451177	0.00344353	0.00486321	0.0041537	0.00599158	0.00342288	0.00330011	0.00512629	0.00387415	0.0055383	0.00472245	0.00449608	0.00349931	0.00510884
Bacteria	Firmicutes	Negativicutes	Selenomonadales	Veillonellaceae	Selenomonas_1	0.00656453	0.0104415	0.00704546	0.0029912	0.00600336	0.00202031	0.00903865	0	0.0028891	0.0116546	0	0.00340165	0.00453876	0.00675712	0.00821823	0.00143312	0.0126678	0.0140467	0.00906521	0.0029516	0.00513531	0.0017216	0.00289995	0.0103867	0.0110302	0.00690331	0.00652768	0.0132703	0.00825195	0.00279879	0.00196651	0.00307345
Bacteria	Firmicutes	Negativicutes	Selenomonadales	Veillonellaceae	Anaerovibrio	0.00155886	0.00161099	0.00173671	0	0.00166493	0.00159718	0	0	0.00185154	0.00307647	0	0.00149758	0.00167081	0.00219054	0	0.00159848	0.00156441	0	0.00204161	0.00158623	0.00179587	0.00189012	0	0.00158685	0.00180108	0.00212072	0.00155674	0.00139943	0.00222136	0.00140632	0.00160673	0.0015469
Bacteria	Firmicutes	Clostridia	Clostridiales	Ruminococcaceae	Ethanoligenens	0	0	0	0	0	0	0	0	0	0	0	0	0	0	0	0	0	0	0	0	0	0	0	0	0	0	0	0	0	0	0	0
Bacteria	Firmicutes	Clostridia	Clostridiales	Ruminococcaceae	[Eubacterium]_coprostanoligenes_group	0	0	0	0	0	0	0	0	0	0	0	0	0	0	0	0	0	0	0	0	0	0	0	0	0	0	0	0	0	0	0	0
Bacteria	Firmicutes	Clostridia	Clostridiales	Ruminococcaceae	Ruminococcaceae_UCG-010	0	0	0	0	0	0	0	0	0	0	0	0	0	0	0	0	0	0	0	0	0	0	0	0	0	0	0	0	0	0	0	0
Bacteria	Firmicutes	Clostridia	Clostridiales	Clostridiaceae_1	Clostridium_sensu_stricto_15	0	0	0	0	0	0	0	0	0	0	0.00111143	0	0	0	0	0	0	0	0	0	0	0	0	0	0	0	0	0	0	0	0	0
Bacteria	Firmicutes	Clostridia	Clostridiales	Ruminococcaceae	Ruminococcaceae_UCG-002	0	0	0	0	0	0	0	0	0	0	0.00347972	0	0	0	0	0	0	0	0	0	0.00143967	0	0	0	0	0.00131631	0	0	0	0	0	0
Bacteria	Firmicutes	Clostridia	Clostridiales	Ruminococcaceae	Ruminococcaceae_UCG-013	0	0	0	0	0	0	0	0	0	0	0	0	0	0	0	0	0	0	0	0	0	0	0	0	0	0	0	0	0	0	0	0
Bacteria	Firmicutes	Clostridia	Clostridiales	Ruminococcaceae	Unknown_Genus	0	0	0	0	0	0	0	0	0	0	0	0.0010697	0	0	0	0	0	0	0	0	0	0	0	0	0	0	0	0	0	0	0	0
Bacteria	Firmicutes	Clostridia	Clostridiales	Ruminococcaceae	Ruminiclostridium_1	0	0	0	0	0	0	0	0	0	0	0	0	0	0	0	0	0	0	0	0	0	0	0	0	0	0	0	0	0	0	0	0
Bacteria	Firmicutes	Clostridia	Clostridiales	Ruminococcaceae	Saccharofermentans	0.00135534	0.00187394	0	0	0	0	0.00463085	0.00110571	0	0.00464471	0	0	0.00140814	0.00221704	0	0.00111343	0.00242041	0.00124182	0	0	0.00167219	0	0.00108134	0.00223602	0	0	0.00109679	0.0033662	0.00292068	0	0	0
Bacteria	Firmicutes	Clostridia	Clostridiales	Ruminococcaceae	Ruminococcaceae_UCG-005	0	0	0	0	0	0	0	0	0	0	0	0	0	0	0	0	0	0	0	0	0	0	0	0	0	0	0	0	0	0	0	0
Bacteria	Firmicutes	Clostridia	Clostridiales	Ruminococcaceae	Ruminococcaceae_UCG-004	0	0.00169753	0.0017915	0	0	0.00143031	0.00210011	0.00146112	0.00164518	0	0.00247216	0	0.0024201	0.00150158	0	0.0014221	0.0015349	0	0.00165471	0	0.00150893	0.00166239	0	0	0	0.00188671	0	0	0.00179354	0.00213373	0.00174473	0
Bacteria	Firmicutes	Erysipelotrichia	Erysipelotrichales	Erysipelotrichaceae	Erysipelotrichaceae_UCG-004	0.00116482	0.00159102	0.0010245	0	0.00144081	0.00124556	0.0021774	0.00503495	0.00137003	0.00503034	0	0.00231056	0.00100335	0.00186373	0.00123133	0.00233709	0.002996	0.00114378	0	0.0048089	0.00123188	0	0.00115998	0	0.00130886	0	0	0.00110766	0.00119295	0	0	0.00137389
Bacteria	Firmicutes	Negativicutes	Selenomonadales	Veillonellaceae	Veillonellaceae_UCG-001	0.00484979	0.0031321	0.00375283	0.00280881	0.00212919	0.00121576	0.00351785	0.00138214	0.00434511	0.00567305	0.00361476	0.00147619	0.005189	0.00804671	0.00225861	0.00325209	0.00739899	0.00303918	0.00273206	0.00599356	0.00502152	0.00487332	0.00356349	0.00390812	0.00290857	0.0010823	0.00261373	0.00257733	0.00472245	0.00318674	0.00157716	0.00196416
Bacteria	Firmicutes	Clostridia	Halanaerobiales	ODP1230B8.23	uncultured_bacterium	0	0	0	0	0	0	0	0	0	0	0.00108027	0	0	0	0	0	0	0	0	0	0	0	0	0	0	0	0	0	0	0	0	0
Bacteria	Firmicutes	Negativicutes	Selenomonadales	Acidaminococcaceae	Acidaminococcus	0	0	0	0	0	0.00970226	0	0.0118272	0.00699918	0	0	0	0	0	0	0.0118288	0	0	0	0.00170671	0	0.0101429	0.00347502	0	0.00972134	0	0.0171683	0	0	0	0.00772806	0
Bacteria	Firmicutes	Negativicutes	Selenomonadales	Acidaminococcaceae	Succiniclasticum	0.0208324	0.0112736	0.0178876	0.0128859	0.00827663	0.0128668	0.0121921	0.0208111	0.0222185	0.0214668	0.0183023	0.0155321	0.0223149	0.034448	0.0130591	0.0179251	0.024578	0.022478	0.0173566	0.0163242	0.020655	0.0241343	0.0176602	0.0221569	0.0151022	0.0155398	0.0256508	0.0145725	0.0247723	0.0264015	0.009734	0.0117137
Bacteria	Cyanobacteria	Melainabacteria	Gastranaerophilales	Unknown_Family	Unknown_Genus	0	0	0	0	0	0	0	0	0	0	0	0	0	0	0	0	0	0	0	0	0	0	0	0	0	0	0	0	0	0	0	0
Bacteria	Cyanobacteria	Melainabacteria	Gastranaerophilales	uncultured_rumen_bacterium	Unknown_Genus	0	0	0	0	0	0	0	0	0	0	0	0	0	0	0	0	0	0	0	0	0	0	0	0	0	0	0	0	0	0	0	0
Bacteria	Armatimonadetes	uncultured	uncultured_organism	Unknown_Family	Unknown_Genus	0	0	0	0	0	0	0	0	0	0	0	0	0.000973207	0	0	0	0	0	0	0	0	0	0	0	0	0	0	0	0	0	0	0
Bacteria	Armatimonadetes	uncultured	uncultured_bacterium	Unknown_Family	Unknown_Genus	0	0	0	0	0	0	0	0	0	0	0	0	0.00159761	0	0	0	0	0	0	0	0	0	0	0	0	0	0	0	0	0	0	0
Bacteria	Actinobacteria	Coriobacteriia	Coriobacteriales	Coriobacteriaceae	Olsenella	0.0110852	0.00821803	0.00679344	0.0055629	0.00595533	0.0102386	0.00414943	0.00774	0.00932651	0.0223837	0.0016308	0.00246031	0.0069158	0.00303849	0.00446093	0.00711049	0.0074777	0.0194007	0.0109402	0.0116859	0.00364617	0.0129576	0.00500855	0.00476056	0.011858	0.00469484	0.0145413	0.0106713	0.00679572	0.00707318	0.00968472	0.00375531
Bacteria	Actinobacteria	Coriobacteriia	Coriobacteriales	Coriobacteriaceae	Senegalimassilia	0	0	0	0	0	0	0	0	0	0	0.00122569	0	0	0	0	0	0	0	0	0	0	0	0	0	0	0	0	0	0	0	0	0
Bacteria	Actinobacteria	Coriobacteriia	Coriobacteriales	Coriobacteriaceae	Denitrobacterium	0.0013207	0.0012382	0.00128747	0.00186038	0.00190507	0.000995256	0	0	0.00177702	0.00119117	0	0.00160455	0	0.00188139	0.00181533	0.00200637	0.00117085	0.00181915	0.00113092	0.00115454	0.00116262	0.001922	0	0	0.00134242	0.0011993	0.00167615	0.00141024	0.0017195	0.00277801	0.00123215	0.00171991
Bacteria	Lentisphaerae	Lentisphaeria	Victivallales	vadinBE97	uncultured_rumen_bacterium	0	0	0	0	0	0	0	0	0	0	0	0	0	0	0	0	0	0	0	0	0	0	0	0	0	0	0	0	0	0	0	0
Bacteria	Lentisphaerae	Lentisphaeria	Victivallales	vadinBE97	Unknown_Genus	0	0	0	0	0	0	0	0	0	0	0	0	0	0	0	0	0	0	0	0	0	0	0	0	0	0	0	0	0	0	0	0
Bacteria	Proteobacteria	Gammaproteobacteria	Oceanospirillales	Halomonadaceae	Halomonas	0	0	0	0	0	0	0	0	0	0	0	0	0	0	0	0	0	0	0	0	0	0	0	0	0	0	0	0	0	0	0	0
Bacteria	Proteobacteria	Deltaproteobacteria	Desulfovibrionales	Desulfovibrionaceae	Desulfovibrio	0.00187929	0.00140795	0.0014847	0.00117642	0.00136076	0	0.00101141	0.00317893	0.001135	0.0012683	0	0.00348723	0.00277321	0	0.00136502	0.00108035	0.00113641	0.00172656	0.00117854	0	0.00122693	0.00145289	0.0015237	0.00169177	0.00129767	0.00125049	0.00103488	0.001675	0.0011765	0.00115	0.00103008	0.00152655
Bacteria	Verrucomicrobia	OPB35_soil_group	Unknown_Order	Unknown_Family	Unknown_Genus	0.00567685	0.00207698	0.00412537	0.00241667	0.00158489	0.00164485	0.00221274	0.00477827	0.00275152	0.00288794	0.0029292	0.00220359	0.00561101	0.00543219	0.00196309	0.00222685	0.00571159	0.00212416	0.00272611	0.00271065	0.00448721	0.00291944	0.00300316	0.00355403	0.00181226	0.00582101	0.00151693	0.00149669	0.00347191	0.00351235	0.0018778	0.00129248
Bacteria	Verrucomicrobia	WCHB1-41	uncultured_rumen_bacterium	Unknown_Family	Unknown_Genus	0.00383653	0.00308218	0.00611958	0.0011217	0.00139278	0.0010191	0.0018837	0.00485724	0.00434511	0.00131114	0.00141266	0	0.00466795	0.00451358	0.00102024	0.00283317	0.00377329	0	0.00245826	0.00375476	0.00258744	0.00122516	0.00152862	0.00120653	0.00111868	0.00131631	0	0.00321491	0.00129991	0.00248704	0.00100544	0.000966813
Bacteria	Elusimicrobia	Elusimicrobia	Elusimicrobiales	Elusimicrobiaceae	Elusimicrobium	0	0	0	0	0	0	0	0	0	0	0	0	0	0	0	0	0	0	0	0	0	0	0	0	0	0	0	0	0	0	0	0
Bacteria	Synergistetes	Synergistia	Synergistales	Synergistaceae	Pyramidobacter	0.00783327	0.00335844	0.00374187	0.00307327	0.00254543	0.00134687	0.00210674	0.00304071	0.00357698	0.00356494	0.013815	0.0025031	0.00377656	0.0034448	0.00308184	0.00166463	0.00781715	0.00310454	0.00294634	0.00280101	0.00382427	0.00326102	0.00346519	0.00323272	0.00232686	0.00867301	0.00212725	0.00250169	0.00347191	0.00471776	0.00171516	0.00246283
Bacteria	Synergistetes	Synergistia	Synergistales	Synergistaceae	Fretibacterium	0	0	0	0	0	0	0	0	0	0	0	0	0	0	0	0	0.00136271	0	0	0	0.00119725	0	0	0	0	0	0	0	0.00127523	0	0	0
Bacteria	Firmicutes	Clostridia	Clostridiales	Ruminococcaceae	Candidatus_Soleaferrea	0	0	0	0	0	0	0	0	0	0	0	0	0	0	0	0	0	0	0	0	0	0	0	0	0	0	0	0	0	0	0	0
Bacteria	Actinobacteria	Actinobacteria	Bifidobacteriales	Bifidobacteriaceae	Bifidobacterium	0	0	0	0	0.0023213	0	0	0.00140189	0	0	0	0.00498481	0	0	0.0034055	0	0	0	0	0	0	0	0	0	0	0	0	0.00138322	0.00942845	0	0	0.00698141
Bacteria	Actinobacteria	Coriobacteriia	Coriobacteriales	Coriobacteriaceae	Atopobium	0	0.00143125	0.00168192	0	0	0	0.00161649	0	0	0.00164536	0	0.00113388	0.00126172	0	0	0	0.00138239	0.0019063	0.00207732	0	0	0	0.00108134	0	0	0.00133825	0	0.00181548	0	0.00208524	0	0.00107876
Bacteria	Firmicutes	Clostridia	Clostridiales	Ruminococcaceae	Ruminococcaceae_UCG-012	0	0	0	0	0	0	0	0	0	0	0	0	0	0	0	0	0	0	0	0	0	0	0	0	0	0	0	0	0	0	0	0
Bacteria	Firmicutes	Clostridia	Clostridiales	Clostridiales_vadinBB60_group	uncultured_Clostridiales_bacterium	0	0	0	0	0	0	0	0	0	0	0	0	0	0	0	0	0	0	0	0	0	0	0	0	0	0	0	0	0	0	0	0
Bacteria	Firmicutes	Clostridia	Clostridiales	Clostridiales_vadinBB60_group	Unknown_Genus	0	0	0	0	0	0	0	0	0	0	0	0	0	0	0	0	0	0	0	0	0	0	0	0	0	0	0	0	0	0	0	0
Bacteria	Elusimicrobia	Elusimicrobia	Elusimicrobiales	Elusimicrobiaceae	Unknown_Genus	0	0	0	0	0	0	0	0	0	0	0	0	0	0	0	0	0	0	0	0	0	0	0	0	0	0	0	0	0	0	0	0
Bacteria	Firmicutes	Negativicutes	Selenomonadales	Veillonellaceae	Allisonella	0	0.00208363	0	0	0	0	0	0	0	0.0014911	0	0	0	0	0	0	0	0.00147602	0.00137496	0	0	0	0	0	0	0.00162345	0	0	0	0	0	0
Bacteria	Firmicutes	Negativicutes	Selenomonadales	Veillonellaceae	Schwartzia	0.0132113	0.00828793	0.0112914	0.00962108	0.00864484	0.00696083	0.00640192	0.00363306	0.0111322	0.0100178	0.0121115	0.00712421	0.00974068	0.0187698	0.0102024	0.0121705	0.0132778	0.00978203	0.00994018	0.0103005	0.0137882	0.0181588	0.00716139	0.0173833	0.0111421	0.0145452	0.0143954	0.00938538	0.0153932	0.0159822	0.00808292	0.00983096
Bacteria	Firmicutes	Negativicutes	Selenomonadales	Veillonellaceae	uncultured	0	0	0	0	0	0	0	0	0	0	0	0	0	0	0	0	0	0	0	0	0	0	0	0	0	0	0	0	0	0	0	0
Bacteria	Tenericutes	Mollicutes	Anaeroplasmatales	Anaeroplasmataceae	Anaeroplasma	0.00183599	0	0	0	0	0	0	0.00112546	0	0	0	0	0.00164067	0	0	0	0.00108722	0.00180826	0	0.00111438	0.00132588	0	0.00150895	0	0	0	0	0.00141564	0.00104486	0	0	0
Bacteria	Spirochaetae	Spirochaetes	Spirochaetales	PL-11B10	Unknown_Genus	0.00127307	0.00112836	0.00117242	0.0015412	0.0019691	0	0.00104895	0.00146112	0.00100316	0.00364207	0.00103872	0.00141201	0.00121436	0.00154575	0.00104839	0	0.00251388	0.00139977	0.00239279	0	0.00154356	0	0.00171048	0	0.00107393	0.00189402	0	0.00212887	0.000979045	0.00119849	0	0
Bacteria	Tenericutes	Mollicutes	Mollicutes_RF9	uncultured_Firmicutes_bacterium	Unknown_Genus	0	0	0	0	0	0	0.00107103	0	0	0	0	0	0	0	0	0	0	0	0	0	0	0	0	0	0	0	0	0	0	0	0	0
Bacteria	Firmicutes	Clostridia	Clostridiales	Syntrophomonadaceae	Unknown_Genus	0	0	0	0	0	0	0	0.000987245	0	0.00173105	0	0	0	0	0	0	0	0	0	0	0	0	0	0	0	0	0	0	0	0	0	0
Bacteria	Firmicutes	Clostridia	Clostridiales	Family_XIII	[Eubacterium]_nodatum_group	0.00373693	0	0	0	0	0.0139157	0	0.00914189	0.00971631	0.00859528	0.00247216	0	0.0026268	0	0	0.00834518	0	0.0023039	0	0.0159226	0	0.0105801	0.00763816	0	0.0197335	0	0.0144131	0.00290153	0	0	0.0145936	0
Bacteria	Proteobacteria	Betaproteobacteria	Burkholderiales	Alcaligenaceae	Sutterella	0	0	0	0	0	0	0	0	0	0	0	0	0	0	0	0	0	0	0	0	0	0	0	0	0	0	0	0	0	0	0	0
Bacteria	Proteobacteria	Gammaproteobacteria	Xanthomonadales	Xanthomonadaceae	Xanthomonas	0	0.00325193	0	0	0	0.00104889	0	0	0.00438524	0	0	0	0	0	0	0.00262372	0	0	0	0	0	0.00256874	0	0.00137046	0	0	0	0	0	0	0.00250373	0
Bacteria	Proteobacteria	Gammaproteobacteria	Aeromonadales	Succinivibrionaceae	Ruminobacter	0.00197456	0.002057	0.000991623	0.00163239	0.00190507	0.00345658	0.00651896	0.00722663	0.000974497	0.00564734	0.00744765	0.00293098	0.00559809	0.00537919	0	0.00305365	0.0013332	0.00112744	0.0016071	0.00177698	0.00482858	0.00408539	0.00635531	0.00212455	0	0.00121393	0.00134446	0	0.00500218	0.00241084	0.00200102	0.00634026
Bacteria	Proteobacteria	Gammaproteobacteria	Enterobacteriales	Enterobacteriaceae	Unknown_Genus	0	0	0	0	0	0	0	0	0	0	0	0	0	0	0	0	0	0	0	0	0	0	0	0	0	0.00119199	0	0	0	0	0	0
Bacteria	Tenericutes	Mollicutes	Anaeroplasmatales	Anaeroplasmataceae	Unknown_Genus	0	0	0	0	0	0	0	0	0	0	0	0	0	0	0	0	0	0.00120914	0	0	0	0	0	0	0	0	0	0	0	0	0	0
Bacteria	Tenericutes	Mollicutes	NB1-n	uncultured_bacterium	Unknown_Genus	0	0	0	0	0	0	0	0	0	0	0	0	0	0	0	0	0	0	0	0	0	0	0	0	0	0	0	0	0	0	0	0
Bacteria	Tenericutes	Mollicutes	Mollicutes_RF9	uncultured_bacterium	Unknown_Genus	0	0	0	0	0	0	0	0	0	0	0	0	0	0	0	0	0	0	0	0	0	0	0	0	0	0	0	0	0	0	0	0
Bacteria	Tenericutes	Mollicutes	Mollicutes_RF9	uncultured_rumen_bacterium	Unknown_Genus	0	0	0	0	0	0	0	0	0	0.00279368	0	0	0	0	0	0	0	0	0	0	0	0	0.00133201	0	0	0	0	0	0	0	0	0
Bacteria	Tenericutes	Mollicutes	Mollicutes_RF9	uncultured_bacterium	Unknown_Genus	0	0.00170751	0	0	0	0	0	0	0	0	0	0	0.00112393	0	0.00191384	0	0.00386676	0	0.00180947	0	0	0	0	0	0	0	0	0	0.00212264	0.00171807	0	0
Bacteria	Tenericutes	Mollicutes	Mollicutes_RF9	Unknown_Family	Unknown_Genus	0	0	0	0	0	0	0	0	0	0	0	0	0	0	0	0	0	0	0	0	0	0	0	0	0	0	0	0	0	0	0	0
Bacteria	Firmicutes	Clostridia	Clostridiales	Clostridiales_vadinBB60_group	uncultured_bacterium	0	0	0	0	0	0	0	0	0	0	0	0	0	0	0	0	0	0	0	0	0	0	0	0	0	0	0	0	0	0	0	0
Bacteria	Firmicutes	Negativicutes	Selenomonadales	Veillonellaceae	Megasphaera	0.0217244	0	0	0.0134969	0.0154967	0.00803952	0	0.00390949	0.00708517	0.0119117	0.00210861	0	0.0135086	0	0	0.00955783	0	0.0212525	0	0.00987882	0	0.0104845	0.00592277	0	0.00982202	0	0.011817	0.0072295	0	0	0.00751613	0.0242823
Bacteria	Firmicutes	Clostridia	Clostridiales	Christensenellaceae	Christensenellaceae_R-7_group	0.00831825	0.00863742	0.0111434	0.00352013	0.00361803	0.00628144	0.0069275	0.0110966	0.0087762	0.0015768	0.0101483	0.00673912	0.0109938	0.00655396	0.00302555	0.00245836	0.0105672	0.00477119	0.0128151	0.00478882	0.0103597	0.0082482	0.0112606	0.00257044	0.00684633	0.00851213	0.00860186	0.0129677	0.00812854	0.00847951	0.00621991	0.00763273
Bacteria	Firmicutes	Clostridia	Clostridiales	Clostridiaceae_1	Clostridium_sensu_stricto_12	0	0	0	0	0	0	0	0.00138214	0	0	0	0	0	0	0	0	0	0	0	0	0	0	0	0	0	0	0	0	0	0	0	0
Bacteria	Firmicutes	Bacilli	Lactobacillales	Streptococcaceae	Streptococcus	0.00485845	0.00307219	0.00310636	0	0.00139278	0.00105485	0.00160324	0	0.000980229	0.00632434	0	0.00147619	0.00438804	0.00099811	0	0	0.00257784	0.00157406	0	0	0.00123683	0.00220893	0.00215284	0	0.00213668	0.00135287	0	0.00332838	0.00287132	0	0.00099065	0
Bacteria	Firmicutes	Bacilli	Lactobacillales	Leuconostocaceae	Weissella	0.00193558	0.00175744	0.00127103	0.00141352	0.00192108	0.0012098	0.0028399	0.00112546	0.00146174	0	0.00261758	0.00327329	0.00223062	0.00211988	0.00185051	0.00218276	0.00253848	0.00174835	0.00222017	0.0014758	0.00218671	0.00123882	0.00198573	0.00107539	0.00240516	0	0.00222454	0.00208564	0.00215555	0.00162108	0.00199609	0.00339911
Bacteria	Firmicutes	Bacilli	Lactobacillales	Lactobacillaceae	Lactobacillus	0.044172	0.0290144	0.0630859	0.0288724	0.0829264	0.0220744	0.0406927	0.032974	0.0170594	0.0629349	0	0.0754996	0.0240373	0.0772961	0.140984	0.017914	0.045491	0.0837682	0.0432428	0.0298373	0.0876268	0.0183729	0.0667823	0.0228389	0.0321733	0.0485864	0.0244169	0.0338944	0.0320781	0.0506692	0.017743	0.112425
Bacteria	Firmicutes	Clostridia	Clostridiales	Family_XIII	Family_XIII_UCG-001	0	0	0	0	0	0	0	0	0	0.00120831	0	0	0	0	0	0	0	0	0	0	0	0	0	0	0	0	0	0	0	0	0	0
Bacteria	Firmicutes	Clostridia	Clostridiales	Family_XIII	[Eubacterium]_saphenum_group	0.00158484	0.00134138	0.00135321	0	0.00110462	0.00109657	0.00158999	0.00165857	0.0013127	0.00352209	0.00185932	0.00113388	0.00195933	0.00136026	0	0	0.00116593	0	0	0	0.00130114	0.00126615	0.00152862	0.00141637	0.00107393	0.00100917	0	0	0.00103664	0.00119849	0.00105472	0.0018115
Bacteria	Firmicutes	Clostridia	Clostridiales	Family_XIII	Mogibacterium	0.00273667	0.00538216	0.0036323	0.00259906	0.0026735	0	0.00441443	0.00323816	0.00275725	0.00957221	0.00413412	0.00273844	0.00341053	0.00381578	0.00235711	0	0.00490478	0.00421019	0.0043213	0	0.00373522	0	0.00412382	0.00219012	0.00251703	0.00478259	0.00295426	0.00377685	0.0042535	0.00349849	0	0.00391814
Bacteria	Firmicutes	Clostridia	Clostridiales	Family_XIII	Family_XIII_AD3011_group	0.00256779	0.00446017	0.00389527	0.00161415	0.0016009	0.00148394	0.00892603	0.00511393	0.00104328	0.00576732	0.0106365	0.00783022	0.00571436	0.00380695	0.00119615	0.00124571	0.00120529	0.00111655	0	0.00115454	0.00417553	0.00291033	0.00494957	0.00414418	0	0.00258874	0	0.00111306	0.00364468	0.00363012	0.00102515	0.0064115
Bacteria	Firmicutes	Clostridia	Clostridiales	Family_XIII	Anaerovorax	0	0	0	0	0	0	0	0	0	0	0	0	0	0	0	0	0	0	0	0	0	0	0	0	0	0	0	0	0	0	0	0
Bacteria	Firmicutes	Clostridia	Clostridiales	Family_XIII	Unknown_Genus	0	0	0	0	0	0	0	0	0	0.000951222	0	0	0	0	0	0	0	0	0	0	0	0	0	0	0	0	0	0	0	0	0	0
Bacteria	Firmicutes	Clostridia	Clostridiales	Family_XIII	Family_XIII_UCG-002	0	0	0	0	0	0	0	0	0	0	0	0	0	0	0	0	0	0	0	0	0	0	0	0	0	0	0	0	0	0	0	0
Bacteria	Firmicutes	Erysipelotrichia	Erysipelotrichales	Erysipelotrichaceae	Erysipelotrichaceae_UCG-007	0.01865	0	0	0	0	0.0307635	0	0.0314734	0.00965898	0.0470726	0	0	0.0107354	0	0	0.0211551	0	0.032919	0	0.0329696	0	0.0247446	0.0148045	0	0.0106163	0	0.0179467	0	0	0	0.0125581	0
Bacteria	Firmicutes	Erysipelotrichia	Erysipelotrichales	Erysipelotrichaceae	Erysipelotrichaceae_UCG-006	0.00161082	0	0	0	0	0.00143627	0	0	0.00105475	0	0	0	0	0	0	0.00102523	0	0.00216773	0	0	0	0.00171705	0	0	0	0	0	0	0	0	0.00120258	0
Bacteria	Firmicutes	Erysipelotrichia	Erysipelotrichales	Erysipelotrichaceae	Erysipelotrichaceae_UCG-009	0.00159783	0	0	0	0	0.00141839	0	0.00614066	0.00117513	0	0	0	0.00115837	0	0	0.00101421	0	0.00160674	0	0.00392543	0	0.00179903	0	0	0.00272958	0	0	0.0011725	0	0	0.00119765	0
Bacteria	Firmicutes	Erysipelotrichia	Erysipelotrichales	Erysipelotrichaceae	uncultured	0	0	0	0	0	0	0	0	0	0.00112261	0	0	0	0	0	0	0	0	0	0	0	0	0	0	0	0	0	0	0	0	0	0

## Sheet: Solid_phase_LT
Supplementary Table S2.
d) All genera present in the solid phase at the late time point
Treatments include different: dry matter (DM) concentrations, i.e. 25 or 35; wilting intensities (WI), i.e. low (LI) or high (HI); and sucrose addition (SA)
Domain	Phylum	Class	Order	Family	Genus	25HISA_a	25HISA_b	25HISA_c	25HISA_d	25HI_a	25HI_b	25HI_c	25HI_d	25LISA_a	25LISA_b	25LISA_c	25LISA_d	25LI_a	25LI_b	25LI_c	25LI_d	35HISA_a	35LISA_b	35HISA_c	35HISA_d	35HI_a	35HI_b	35HI_c	35HI_d	35LISA_a	35LISA_b	35LISA_c	35LISA_d	35LI_a	35LI_b	35LI_c	35LI_d
Archaea	Euryarchaeota	Methanomicrobia	Methanomicrobiales	Methanomicrobiaceae	Methanomicrobium	0.00228802	0.00187902	0.00189533	0.00195155	0	0.00266063	0.00112106	0.0016353	0.00135456	0	0.00107753	0.00234761	0.00204413	0.00266131	0.00138488	0	0.00227986	0.00132897	0.00134274	0.00167023	0.00339554	0.00297428	0.00162006	0.00248628	0.00352522	0.00120904	0.00186933	0.00274048	0.00151611	0.00143287	0.00134577	0
Archaea	Euryarchaeota	Methanobacteria	Methanobacteriales	Methanobacteriaceae	Methanosphaera	0.00527423	0.00818838	0.00347666	0.00284602	0	0.00575633	0	0.00257382	0	0.00161358	0.00321521	0.00353259	0.00656831	0.00514637	0	0.00257217	0.00652931	0.00389581	0.00252624	0.00372806	0	0.00502713	0.00153479	0.00965236	0.00231765	0.00209625	0.00563093	0.00402767	0	0	0.00419882	0
Archaea	Euryarchaeota	Methanobacteria	Methanobacteriales	Methanobacteriaceae	Methanobrevibacter	0.0149983	0.0233067	0.0168764	0.0128026	0.018711	0.0278237	0.0138279	0.0165734	0.00792865	0.0083691	0.0133648	0.0215667	0.0290665	0.0231058	0.0117762	0.0158367	0.0171687	0.0149241	0.012076	0.0178439	0	0.0133414	0.0143588	0.020668	0.0286368	0.00695852	0.010849	0.0145993	0	0.00916701	0.0144536	0.00756801
Archaea	Euryarchaeota	Thermoplasmata	Thermoplasmatales	Thermoplasmatales_Incertae_Sedis	Candidatus_Methanomethylophilus	0.00178752	0	0	0	0	0	0	0	0	0	0	0	0	0.00121609	0	0	0	0.00157547	0	0	0	0	0	0	0	0	0	0	0	0	0	0
Archaea	Euryarchaeota	Thermoplasmata	Thermoplasmatales	Thermoplasmatales_Incertae_Sedis	uncultured	0.00683883	0.00813667	0.00539091	0.00501441	0.00679336	0.0104124	0.00281867	0.00403137	0.00596801	0.00242037	0.00119919	0.00297364	0.0100175	0.00867128	0.00545475	0.00300087	0.00262161	0.00338672	0.00352469	0.00481335	0.00455954	0.0120557	0.00794679	0.00499004	0.0105532	0.00355754	0.00731103	0.00305605	0.00570102	0.00701352	0.00383097	0
Bacteria	Bacteroidetes	Bacteroidia	Bacteroidales	Prevotellaceae	Unknown_Genus	0.00336894	0.00631511	0.00124842	0.00212322	0.00303066	0.00204149	0	0.00142911	0.00149697	0.00147374	0.00133822	0.00165898	0.00283978	0.00155096	0.00180883	0.00196034	0.00621453	0.00204168	0.00161817	0.00237496	0.00203861	0.00352285	0.00206344	0.00252561	0.00113257	0.00259205	0.00299896	0.00162768	0.00236217	0.00215349	0.00513189	0.00114743
Bacteria	Bacteroidetes	Bacteroidia	Bacteroidales	Prevotellaceae	Prevotella_1	0.0660246	0.0322076	0.064252	0.0306828	0.0279348	0.0345631	0.0663805	0.0494927	0.0499001	0.0833145	0.0660595	0.0769255	0.0370018	0.0462821	0.0211219	0.0989661	0.0517038	0.0700923	0.0471723	0.0405858	0.0962199	0.0511284	0.0486016	0.0447224	0.03991	0.050458	0.0409647	0.0788842	0.042803	0.0708977	0.0532657	0.133572
Bacteria	Bacteroidetes	Bacteroidia	Bacteroidales	Prevotellaceae	Prevotella_7	0.0036213	0.0213415	0.0624286	0.0178983	0.00225469	0.0156417	0.0071153	0.00392472	0.0352285	0.0892632	0.0502094	0.00401105	0.00990325	0.00269656	0.00280745	0.0593555	0.0452465	0.0102298	0.0420811	0.00877397	0.00791007	0.0128057	0.0105048	0.00911053	0.00813051	0.0420642	0.0692398	0.0126477	0.0253195	0.0104909	0.0243944	0.0834049
Bacteria	Bacteroidetes	Bacteroidia	Bacteroidales	Prevotellaceae	Prevotellaceae_YAB2003_group	0.0504122	0.0366955	0.0292584	0.00420126	0.00333812	0.0155747	0.0101582	0.00649854	0.0337812	0.0328525	0.0200907	0.052886	0.0119897	0.0140292	0.00406045	0.0369885	0.0407362	0.0811635	0.0441081	0.0066809	0.0147462	0.01368	0.0127899	0.0135063	0.00576036	0.0300608	0.0358843	0.0645839	0.0100108	0.00996305	0.0295442	0.0394452
Bacteria	Bacteroidetes	Bacteroidia	Bacteroidales	Prevotellaceae	Prevotella_9	0	0	0	0	0	0	0	0	0	0	0	0	0	0	0	0	0	0	0	0	0	0	0	0	0	0	0	0	0	0	0	0
Bacteria	Bacteroidetes	Bacteroidia	Bacteroidales	Porphyromonadaceae	uncultured	0	0.00128716	0	0	0	0	0	0	0	0	0	0	0	0	0	0	0	0	0	0	0	0	0	0	0	0	0	0	0	0	0.00163287	0
Bacteria	Bacteroidetes	Bacteroidia	Bacteroidales	Bacteroidales_S24-7_group	Unknown_Genus	0.0083782	0.009918	0.00443378	0.00460784	0.0053732	0.00537983	0.00494182	0.00770013	0.00486185	0.00463635	0.00231148	0.0108169	0.00526057	0.00692645	0.00764984	0.00767073	0.0115702	0.00918488	0.00905057	0.00264276	0.0070226	0.01059	0.00284789	0.00502062	0.00357772	0.00601042	0.0105623	0.00640275	0.00538871	0.0040975	0.0111879	0.0010283
Bacteria	Bacteroidetes	Bacteroidia	Bacteroidales	Bacteroidales_BS11_gut_group	uncultured_rumen_bacterium	0.0140478	0.00559109	0.00405169	0.00941444	0.00423121	0.0104585	0.00559158	0.00343413	0	0	0.00276334	0.0108571	0.0115411	0.00299617	0	0.0023932	0.00977147	0.00375648	0.00510843	0.00892901	0.0016206	0.00722998	0.00576398	0.0162679	0.0150234	0.00201797	0.00646238	0.00710033	0.00183409	0.00461702	0.00981518	0.00630145
Bacteria	Bacteroidetes	Bacteroidia	Bacteroidales	Rikenellaceae	Unknown_Genus	0	0	0	0	0	0	0	0	0	0	0	0	0	0	0	0	0	0	0	0	0	0	0	0	0	0	0	0	0	0	0	0
Bacteria	Bacteroidetes	Bacteroidia	Bacteroidales	Bacteroidales_BS11_gut_group	Unknown_Genus	0.0157722	0.0193131	0.0134413	0.0247016	0.0262803	0.024728	0.0222839	0.0283476	0.0082764	0.00557223	0.00768175	0.00905058	0.0311995	0.0194223	0.0181637	0.00901092	0.0197858	0.0123787	0.0235969	0.0353707	0.0187076	0.0253156	0.012176	0.0177754	0.00859554	0.0218497	0.0350184	0.0130048	0.0350749	0.00687945	0.00918715	0.00337959
Bacteria	Bacteroidetes	Bacteroidia	Bacteroidales	Bacteroidales_BS11_gut_group	uncultured_bacterium	0.00286423	0	0	0.00572817	0	0	0	0	0	0	0	0	0	0	0	0	0	0	0	0.00261457	0	0.00213428	0	0	0.00225014	0	0	0	0	0	0	0
Bacteria	Bacteroidetes	Bacteroidia	Bacteroidales	Marinilabiaceae	uncultured	0	0	0	0	0	0	0	0	0	0	0	0	0	0	0	0	0	0	0	0	0	0	0	0	0	0	0	0	0	0	0	0
Bacteria	Bacteroidetes	Bacteroidetes_BD2-2	Unknown_Order	Unknown_Family	Unknown_Genus	0.0036213	0.00735518	0.00216015	0.011357	0.00161049	0.00187415	0.00272258	0.00189837	0.00230507	0.00335625	0.00208554	0.00251306	0.00133313	0.00306667	0.00162983	0.00324643	0.00189314	0.00170944	0.0022465	0.00367168	0.00216723	0.00195857	0	0	0.00171011	0.0023311	0.00278106	0.00114602	0.00264609	0	0.00502422	0.00138569
Bacteria	Bacteroidetes	Bacteroidia	Bacteroidales	PeH15	uncultured_rumen_bacterium	0.00432369	0.00547616	0.00430894	0.00512283	0.0122105	0.00436745	0.00201333	0.00375408	0.00154665	0.00266779	0.00172057	0.0041452	0.00633554	0.00183295	0.00676427	0.00276363	0.00239228	0	0	0.00250886	0.00145983	0.00401142	0.00960095	0.00372287	0.0128183	0.0037489	0	0.00134533	0.00208961	0.00779279	0.00641486	0.00447685
Bacteria	Bacteroidetes	Bacteroidia	Bacteroidales	Bacteroidales_S24-7_group	uncultured_bacterium	0.0102961	0.115505	0.0668435	0.0385071	0.0921642	0.171151	0.0102909	0.0270038	0.00863077	0.0134895	0.00926328	0.00785666	0.130406	0.00606285	0.024504	0.020952	0.0620644	0.00561596	0.0690262	0.0281049	0.00280389	0.135998	0.0229536	0.0815797	0.0250141	0.0251116	0.0590273	0.00544774	0.0994725	0.040422	0.023264	0.0124963
Bacteria	Bacteroidetes	Bacteroidia	Bacteroidales	Bacteroidales_S24-7_group	uncultured_rumen_bacterium	0.0335759	0.00416602	0.00146406	0	0.00105414	0	0	0.00155709	0	0	0	0.0322807	0	0.0497541	0	0	0	0.0104495	0	0	0.0355246	0	0	0	0	0	0	0.0131377	0	0.00130718	0.00182128	0
Bacteria	Bacteroidetes	Bacteroidia	Bacteroidales	Rikenellaceae	SP3-e08	0	0	0	0	0	0	0	0	0	0	0	0	0	0	0	0	0	0	0	0	0	0	0	0	0	0	0	0	0	0	0	0
Bacteria	Bacteroidetes	Bacteroidia	Bacteroidales	Rikenellaceae	Rikenellaceae_RC9_gut_group	0.0542774	0.0437174	0.0339987	0.0182597	0.0471436	0.0311495	0.0199046	0.0692158	0.0276873	0.0289476	0.0191522	0.031449	0.0443954	0.0491197	0.0324459	0.0235366	0.0422561	0.0423126	0.0292734	0.0346448	0.0366757	0.0262371	0.050631	0.0242948	0.0550759	0.03795	0.0200695	0.0411072	0.0116462	0.0482734	0.0357707	0.0304664
Bacteria	Bacteroidetes	Bacteroidia	Bacteroidales	Prevotellaceae	Prevotellaceae_UCG-001	0.00272544	0.00155148	0	0.00257497	0.00265	0	0.00175252	0.00231075	0	0.000989662	0	0.00137726	0	0.00204445	0.00137546	0	0	0.00152188	0	0.00216354	0.00397433	0.00274285	0.00293315	0	0.00199512	0.00124383	0.0014106	0.00140346	0.00135711	0.0021116	0.00132783	0
Bacteria	Bacteroidetes	Bacteroidia	Bacteroidales	Prevotellaceae	Prevotellaceae_Ga6A1_group	0.0619028	0.0376436	0.0294287	0.0144108	0.0183596	0.0166415	0.0389534	0.0441389	0.0209708	0.0365852	0.0447696	0.0508246	0.0172418	0.0468285	0.0509393	0.0297631	0.0434837	0.0635011	0.0418659	0.0143414	0.0819946	0.0419527	0.0703274	0.0279696	0.0314795	0.043569	0.0294563	0.0884427	0.0141219	0.0587811	0.0686973	0.0462922
Bacteria	Bacteroidetes	Bacteroidia	Bacteroidales	Prevotellaceae	Prevotellaceae_UCG-004	0.00464754	0.00483833	0.00641612	0.00531256	0.0077743	0.0103288	0.00477709	0.006399	0.0054348	0.00461484	0.00290238	0.00358625	0.0107539	0.00867128	0.00634032	0.00546898	0.00366037	0.00257755	0.00147185	0.0125725	0.00342127	0.00689141	0.00474079	0.0059863	0.00829552	0.00506232	0.00297029	0.00155294	0.00287322	0.00268977	0.00534721	0.00251431
Bacteria	Bacteroidetes	Bacteroidia	Bacteroidales	Bacteroidales_Incertae_Sedis	Phocaeicola	0	0.000919398	0	0.00243041	0.00672016	0.00312499	0.0051523	0.0032706	0	0	0	0	0.0145798	0.00331342	0.00456918	0	0	0	0	0.00754773	0.00405793	0.0102214	0.00197817	0.0133577	0.00443278	0	0	0	0.0151611	0.00253056	0.00161493	0.00267106
Bacteria	Bacteroidetes	Bacteroidia	Bacteroidales	Bacteroidales_UCG-001	Unknown_Genus	0	0	0	0	0	0	0	0	0	0	0	0	0	0	0	0	0	0	0	0	0	0	0	0	0	0	0	0	0	0	0	0
Bacteria	Bacteroidetes	Bacteroidia	Bacteroidales	Bacteroidales_UCG-001	uncultured_rumen_bacterium	0	0	0	0	0	0	0	0	0	0	0	0	0	0	0	0	0	0	0	0	0	0	0	0	0	0	0	0	0	0	0	0
Bacteria	Bacteroidetes	Bacteroidia	Bacteroidales	Prevotellaceae	Prevotellaceae_UCG-003	0.00256561	0.00149402	0.00146784	0	0	0	0	0	0.00141749	0	0	0.00142198	0	0	0	0.00138181	0.0012591	0	0	0	0	0	0	0	0	0.00159176	0	0.00138685	0	0	0.00173156	0
Bacteria	Bacteroidetes	Bacteroidia	Bacteroidales	Bacteroidales_RF16_group	Unknown_Genus	0	0	0	0	0	0	0	0	0	0	0	0	0	0	0	0	0	0	0	0	0	0	0	0	0	0	0	0	0	0	0	0
Bacteria	Bacteroidetes	Bacteroidia	Bacteroidales	Porphyromonadaceae	Unknown_Genus	0	0	0	0	0	0	0.00106615	0.00275157	0	0	0	0	0	0	0	0	0	0	0	0.00159975	0	0	0.0013472	0	0	0	0	0	0	0.00153342	0	0
Bacteria	Bacteroidetes	Bacteroidia	Bacteroidales	Unknown_Family	Unknown_Genus	0.00414283	0.00316617	0.00347666	0.00573721	0.00876987	0.0011337	0.00974637	0.0183296	0.00202687	0.00140919	0.00359756	0.00166345	0.00128658	0.00102223	0.00849773	0.00173975	0.00242376	0	0.00317609	0.00664567	0.00144053	0.00500141	0.0106924	0.00158178	0.0118282	0.00194838	0.00382467	0.0011128	0.0104197	0.0199345	0.00310425	0.00158634
Bacteria	Spirochaetae	Spirochaetes	Spirochaetales	Spirochaetaceae	Unknown_Genus	0.0040461	0.00619444	0	0.00135525	0.00465579	0.00114206	0.0127435	0.00673317	0.00711724	0.00586267	0.00300666	0.0100522	0	0.00229119	0.00501197	0.00784554	0	0.00556773	0	0.00572951	0.00848242	0	0.00513302	0	0.00310519	0.004236	0	0.00136193	0	0.00483488	0.00704288	0.00221335
Bacteria	Spirochaetae	Spirochaetes	Spirochaetales	Spirochaetaceae	Treponema_2	0.171055	0.130842	0.148494	0.265728	0.236889	0.136048	0.256252	0.202336	0.327476	0.24464	0.313283	0.17887	0.107717	0.166764	0.373373	0.164536	0.15329	0.220282	0.172223	0.221816	0.204189	0.141835	0.230355	0.109798	0.124778	0.287439	0.124138	0.191759	0.096957	0.206568	0.162668	0.22637
Bacteria	SR1_(Absconditabacteria)	uncultured_bacterium	Unknown_Order	Unknown_Family	Unknown_Genus	0	0.00125268	0	0	0	0	0	0	0	0	0	0	0	0	0	0	0	0	0	0	0	0	0	0	0	0	0	0	0	0	0	0
Bacteria	SR1_(Absconditabacteria)	uncultured_rumen_bacterium	Unknown_Order	Unknown_Family	Unknown_Genus	0	0	0	0	0	0	0	0	0	0	0	0	0	0	0	0	0	0	0	0	0	0	0	0	0	0	0	0	0	0	0	0
Bacteria	Cyanobacteria	Melainabacteria	Gastranaerophilales	uncultured_bacterium	Unknown_Genus	0	0	0	0	0	0	0	0	0	0	0	0	0	0	0	0	0	0	0	0	0	0	0	0	0	0	0	0	0	0	0	0
Bacteria	Chloroflexi	Anaerolineae	Anaerolineales	Anaerolineaceae	uncultured	0	0	0	0	0	0	0	0	0	0	0	0	0	0	0	0	0	0	0	0	0	0	0	0	0	0	0	0	0	0	0	0
Bacteria	Elusimicrobia	Elusimicrobia	Lineage_I	Unknown_Family	Candidatus_Endomicrobium	0.000975774	0.00106305	0.00143757	0	0	0	0	0	0.00160958	0.00131238	0	0	0	0	0	0.00128608	0.00187065	0	0.00168703	0	0	0	0	0	0	0.00101768	0.00393362	0.0012955	0	0	0.00125606	0
Bacteria	Elusimicrobia	Elusimicrobia	Lineage_IV	uncultured_bacterium	Unknown_Genus	0	0	0	0	0	0	0	0	0	0	0	0	0	0	0	0	0	0	0	0	0	0	0	0	0	0	0	0	0	0	0	0
Bacteria	Elusimicrobia	Elusimicrobia	Lineage_IV	uncultured_bacterium	Unknown_Genus	0	0.00102858	0	0	0	0.00111696	0	0	0	0	0	0	0	0	0	0	0.00129507	0	0	0	0	0	0	0.00110113	0	0	0.00136473	0	0	0	0	0
Bacteria	Planctomycetes	Planctomycetacia	Planctomycetales	Planctomycetaceae	CPla-4_termite_group	0	0	0	0	0	0	0	0	0	0	0	0	0	0	0	0	0	0	0	0	0	0	0	0	0	0	0	0	0	0	0	0
Bacteria	Planctomycetes	Planctomycetacia	Planctomycetales	Planctomycetaceae	p-1088-a5_gut_group	0	0	0	0	0	0	0	0	0	0	0	0	0	0	0	0	0	0	0	0.00114872	0	0	0	0	0.00210763	0	0	0	0	0	0	0
Bacteria	Lentisphaerae	Oligosphaeria	Oligosphaerales	Oligosphaeraceae	horsej-a03	0	0	0	0	0	0	0	0	0	0	0	0	0	0	0	0	0	0	0	0	0	0	0	0	0	0	0.00139913	0	0	0	0	0
Bacteria	Firmicutes	Erysipelotrichia	Erysipelotrichales	Erysipelotrichaceae	Kandleria	0	0	0	0	0	0	0	0	0	0	0	0	0	0	0	0	0	0	0	0	0	0	0	0	0	0	0	0	0	0	0	0
Bacteria	Firmicutes	Erysipelotrichia	Erysipelotrichales	Erysipelotrichaceae	Erysipelotrichaceae_UCG-002	0	0	0	0	0	0	0	0	0	0	0	0	0	0	0	0	0	0	0	0	0	0	0	0	0	0	0	0	0	0	0	0
Bacteria	Firmicutes	Clostridia	Halanaerobiales	ODP1230B8.23	Unknown_Genus	0	0.00122395	0	0	0	0	0	0	0.0014771	0	0	0	0.00234885	0	0	0	0.00120513	0	0	0	0	0	0	0	0	0	0	0	0	0	0.00182128	0
Bacteria	Fibrobacteres	Fibrobacteria	Fibrobacterales	Fibrobacteraceae	Fibrobacter	0.0861499	0.0425279	0.0523126	0.110462	0.044435	0.0288193	0.0452268	0.0802292	0.0720169	0.0649842	0.111003	0.109698	0.0359395	0.0370468	0.0952839	0.0833167	0.0317831	0.0812653	0.0720689	0.0327984	0.049499	0.0233742	0.0503411	0.0116624	0.0372623	0.106048	0.0598243	0.0801631	0.065891	0.0276686	0.121505	0.0304664
Bacteria	Verrucomicrobia	Opitutae	Opitutae_vadinHA64	uncultured_bacterium	Unknown_Genus	0	0	0	0	0	0	0	0	0	0	0	0	0	0	0	0	0	0	0	0	0	0	0	0	0	0	0	0	0	0	0	0
Bacteria	Proteobacteria	Epsilonproteobacteria	Campylobacterales	Campylobacteraceae	Campylobacter	0	0	0	0	0	0	0	0	0	0	0	0	0	0	0	0	0	0	0	0	0	0	0	0	0	0	0	0	0	0	0	0
Bacteria	Synergistetes	Synergistia	Synergistales	Synergistaceae	Synergistes	0	0	0	0.00213225	0.00111271	0.00296602	0.00107073	0.00264492	0	0	0	0	0.00266203	0.00163908	0.00190304	0	0.0012546	0	0	0.00180413	0.00171706	0.00360856	0.00165416	0.00943388	0.00192762	0.00256595	0.00170304	0.00215916	0.00295272	0.00305008	0	0.00110354
Bacteria	Proteobacteria	Gammaproteobacteria	Aeromonadales	Succinivibrionaceae	Anaerobiospirillum	0	0	0	0	0.000922374	0	0	0	0	0	0	0	0	0	0	0	0	0	0	0	0	0	0	0	0.000982561	0	0	0	0	0.00111445	0	0
Bacteria	Proteobacteria	Gammaproteobacteria	Aeromonadales	Succinivibrionaceae	Succinivibrio	0.00179593	0.0030455	0.00423706	0.00482468	0.010966	0.00714522	0.00642894	0.00646299	0	0	0.0138167	0.00194963	0.00575574	0.00636247	0.0138206	0.0017231	0.00206851	0	0.00250903	0.00460193	0.00564638	0.00856283	0.00763984	0.0142579	0.007958	0.00201797	0.00250582	0.00190172	0.00997678	0.00704703	0.0060829	0.00262717
Bacteria	Firmicutes	Clostridia	Clostridiales	Lachnospiraceae	Oribacterium	0.00520693	0.00650474	0.0153367	0	0	0.0011337	0	0	0.0058256	0.01648	0.00524861	0.00669851	0	0	0	0.00564795	0.0185941	0.0112962	0.013479	0	0.0019743	0	0	0	0	0.0104465	0.017793	0.0132539	0.00122083	0	0.00428853	0.0194749
Bacteria	Firmicutes	Clostridia	Clostridiales	Lachnospiraceae	Lachnospiraceae_NK4A136_group	0.0111835	0.00837226	0.0109937	0.023256	0.0474364	0.0166248	0.0622074	0.0365383	0.0230242	0.0150493	0.0117659	0.00871521	0.0193579	0.0382101	0.0335293	0.0268663	0.0115522	0.00893838	0.0131347	0.0396908	0.0212221	0.0195299	0.0409447	0.034904	0.0653891	0.00875904	0.0167265	0.00808025	0.0437513	0.0469495	0.023569	0.0110981
Bacteria	Firmicutes	Clostridia	Clostridiales	Lachnospiraceae	Lachnospiraceae_UCG-009	0	0	0	0	0.00204972	0.00132613	0	0	0	0	0	0	0.00150665	0	0	0	0.00110621	0	0	0	0	0	0	0	0.00541534	0	0	0	0	0	0.00131886	0
Bacteria	Firmicutes	Clostridia	Clostridiales	Lachnospiraceae	Lachnospiraceae_FCS020_group	0.00206511	0.00245364	0	0.00113841	0	0.00437163	0	0	0	0	0	0.00666273	0.00314026	0.00264368	0	0	0	0.0010128	0	0	0.00284248	0.00183428	0	0	0.00399775	0	0	0	0.00360572	0	0	0
Bacteria	Firmicutes	Clostridia	Clostridiales	Lachnospiraceae	Unknown_Genus	0.0172737	0.0191752	0.0186998	0.0293366	0.0268806	0.0308859	0.034698	0.0393396	0.0261573	0.0140381	0.0163889	0.0143539	0.0324268	0.0290277	0.0130292	0.0233826	0.0115747	0.00797381	0.0164744	0.0516995	0.0210485	0.0275142	0.025324	0.0276943	0.0381849	0.0089069	0.0191979	0.00801382	0.0374995	0.0207557	0.0190651	0.00739872
Bacteria	Firmicutes	Clostridia	Clostridiales	Lachnospiraceae	[Eubacterium]_cellulosolvens_group	0	0	0	0	0	0	0	0	0	0	0	0	0	0	0	0	0	0	0	0	0	0	0	0	0.00180011	0	0	0	0	0	0	0
Bacteria	Firmicutes	Clostridia	Clostridiales	Lachnospiraceae	Syntrophococcus	0.00211558	0.00259155	0.00377553	0.00322549	0.00237182	0.00408298	0.00196758	0	0.00311317	0.00343155	0.00241575	0.00396187	0.00399939	0.00271418	0	0.00330054	0.0029229	0.00287229	0.00250042	0.0022763	0.00252736	0.00194571	0.00213165	0.00284458	0.0031277	0.00165265	0.003796	0.0016692	0.00224861	0.00140773	0.00202763	0.00463988
Bacteria	Firmicutes	Clostridia	Clostridiales	Lachnospiraceae	Coprococcus_1	0.00116925	0	0.00120681	0.00122876	0.00125911	0.00172774	0	0	0	0	0	0.00154271	0.00303869	0.00271418	0	0.00104052	0	0	0	0.00150109	0	0.00194142	0	0.00378841	0.00235515	0	0	0	0	0	0	0
Bacteria	Firmicutes	Clostridia	Clostridiales	Lachnospiraceae	Roseburia	0.0294541	0.0387296	0.0324779	0.022994	0.0431759	0.0356006	0.0474964	0.0331397	0.0418589	0.0254408	0.0293366	0.0322449	0.0344117	0.0576499	0.0411886	0.0411422	0.0238643	0.0226675	0.0255594	0.0336864	0.041962	0.0291128	0.042957	0.0482662	0.047298	0.018501	0.01527	0.0266408	0.0337291	0.0416789	0.0484748	0.0300714
Bacteria	Firmicutes	Clostridia	Clostridiales	Lachnospiraceae	Pseudobutyrivibrio	0.0276876	0.0202727	0.0214766	0.0118087	0.0322392	0.0178589	0.0430304	0.0351874	0.0202157	0.0385323	0.0266428	0.0293518	0.0233658	0.0337863	0.02522	0.0245397	0.0237429	0.0391992	0.0291357	0.0334679	0.0547788	0.0339513	0.0473738	0.0555109	0.0313445	0.0200231	0.0177988	0.0352774	0.0500429	0.0570801	0.0341647	0.0341031
Bacteria	Firmicutes	Clostridia	Clostridiales	Lachnospiraceae	[Eubacterium]_oxidoreducens_group	0.00331427	0.00273521	0.00130517	0	0.00158121	0.00138888	0.003624	0.00295065	0.00287803	0.00240961	0.00163368	0.00257119	0.0015659	0.00248506	0	0.00211434	0.00315673	0.00364394	0.00413581	0.00167727	0.0031383	0.00180428	0.00342769	0.00377967	0.00168011	0.00394896	0.00181199	0.00570517	0.00169781	0.00263112	0.00295173	0.00309116
Bacteria	Firmicutes	Clostridia	Clostridiales	Lachnospiraceae	uncultured	0	0	0	0	0	0	0	0	0	0	0	0	0	0	0	0	0	0	0.00179032	0.00117691	0	0	0	0	0	0	0	0	0	0	0	0
Bacteria	Firmicutes	Clostridia	Clostridiales	Lachnospiraceae	Lachnospiraceae_UCG-001	0	0	0	0	0	0	0	0	0	0	0	0	0.00198065	0	0	0	0	0	0	0	0.0074792	0.00189857	0.00124488	0.00252124	0	0	0	0.00220069	0	0.00199429	0	0
Bacteria	Firmicutes	Clostridia	Clostridiales	Lachnospiraceae	Anaerostipes	0	0.00175835	0	0	0	0.00466447	0	0	0	0	0	0	0.00474848	0	0	0	0.00115567	0	0	0	0	0.00620141	0	0.00304995	0	0	0	0	0	0	0	0
Bacteria	Firmicutes	Clostridia	Clostridiales	Lachnospiraceae	Coprococcus_2	0	0	0	0	0	0.00230923	0	0.00157131	0	0	0	0	0.00112152	0.00128659	0	0	0	0	0	0	0	0	0	0.00131524	0.00174761	0	0	0	0	0	0	0
Bacteria	Firmicutes	Clostridia	Clostridiales	Lachnospiraceae	[Eubacterium]_ruminantium_group	0.00235532	0.0113718	0.00994197	0.0204461	0.0137185	0.0299196	0.00921558	0.00851067	0.00661714	0.00408774	0.00437964	0.00111344	0.0273948	0.0103104	0.00832815	0.0154164	0.0112689	0.00262578	0.00560335	0.0117621	0.0039679	0.0138557	0.00949864	0.0166262	0.0191787	0.00263554	0.00568827	0.0011211	0.0103345	0.00977032	0.0102458	0.0086402
Bacteria	Firmicutes	Clostridia	Clostridiales	Lachnospiraceae	Lachnoclostridium_10	0.00258244	0.00168365	0.00135435	0	0.00155193	0.00202476	0	0.00140778	0	0	0	0.00176629	0.00232345	0	0	0	0.00201006	0.00114141	0.00179893	0	0	0.00159857	0	0	0.00118507	0	0.00294735	0.00166089	0	0	0.00192894	0
Bacteria	Firmicutes	Clostridia	Clostridiales	Lachnospiraceae	Lachnospiraceae_UCG-006	0	0.00104582	0	0	0	0	0	0	0	0	0	0	0	0	0	0	0	0	0	0	0	0	0	0	0	0	0	0	0	0	0	0
Bacteria	Firmicutes	Clostridia	Clostridiales	Lachnospiraceae	[Eubacterium]_ventriosum_group	0	0	0	0	0	0	0	0	0	0	0	0	0	0	0	0	0	0	0.0011792	0	0	0	0	0	0	0	0.00184639	0.00123737	0	0	0	0
Bacteria	Firmicutes	Clostridia	Clostridiales	Lachnospiraceae	[Bacteroides]_pectinophilus_group	0	0	0	0	0	0	0	0	0	0	0	0	0	0	0	0	0	0	0	0	0	0	0	0	0	0	0	0	0	0	0	0
Bacteria	Firmicutes	Clostridia	Clostridiales	Lachnospiraceae	Lachnoclostridium_1	0.00292732	0.00256282	0.00267086	0.00121069	0.00140552	0	0.004228	0.00381096	0.00355696	0.00496983	0.00298928	0.00330006	0	0.00170958	0	0.00416209	0.00638541	0.00510152	0.0056636	0.00183936	0.00381355	0	0.00308663	0.00485458	0.00239265	0.00414902	0.00693831	0.00470864	0.00451425	0.00507789	0.00401938	0.00838313
Bacteria	Firmicutes	Clostridia	Clostridiales	Lachnospiraceae	Butyrivibrio_2	0.0814309	0.0970539	0.0678422	0.0471535	0.0549032	0.0526981	0.0648751	0.0353509	0.0693144	0.033939	0.0383392	0.0710676	0.0559491	0.0813197	0.0619618	0.0560175	0.0789362	0.0560042	0.0542044	0.063525	0.0604059	0.0397713	0.0630286	0.0415633	0.0988637	0.0416989	0.0453743	0.0534061	0.0820855	0.0610938	0.0543693	0.0269176
Bacteria	Firmicutes	Clostridia	Clostridiales	Lachnospiraceae	[Ruminococcus]_gauvreauii_group	0	0	0	0	0	0	0	0	0	0	0	0.00181101	0	0.00128659	0	0	0	0	0	0	0	0	0	0	0	0	0	0	0	0	0	0.00128537
Bacteria	Firmicutes	Clostridia	Clostridiales	Lachnospiraceae	uncultured_bacterium	0	0	0	0.00134621	0.00130304	0	0	0	0	0	0	0	0	0	0	0	0	0	0	0.00150109	0	0	0.00138131	0	0.00182261	0	0	0	0.00153314	0.00115635	0	0
Bacteria	Firmicutes	Clostridia	Clostridiales	Lachnospiraceae	Moryella	0	0.00129865	0	0.00127393	0.00162513	0	0	0	0	0	0	0	0.0014474	0.00121609	0	0	0.00127258	0.00130753	0	0.00146585	0	0	0	0	0.00207013	0	0	0	0	0	0	0
Bacteria	Firmicutes	Clostridia	Clostridiales	Lachnospiraceae	Lachnospira	0.00374748	0.045717	0.0896782	0.0881994	0.0286229	0.0724018	0.0144548	0.013054	0.0102304	0.00798184	0.029997	0.00994491	0.0634274	0.0154215	0.014904	0.0262586	0.0383619	0.00879369	0.0592612	0.0118819	0.0127526	0.0852512	0.0134379	0.107644	0.0105082	0.00523629	0.0646582	0.00459238	0.0966447	0.0270066	0.0132963	0.0151423
Bacteria	Firmicutes	Clostridia	Clostridiales	Lachnospiraceae	[Eubacterium]_eligens_group	0.00304088	0	0	0.00807727	0.00352845	0	0.00762321	0.00282978	0.0121414	0.00815396	0	0.00760625	0	0.0091119	0.00341982	0.0152707	0	0.00243287	0	0.00851322	0.00360776	0	0.00209754	0	0.00192762	0	0	0.00154463	0	0.00448295	0.00298762	0
Bacteria	Firmicutes	Clostridia	Clostridiales	Lachnospiraceae	Lachnospiraceae_NK3A20_group	0.0177868	0.0306906	0.0281916	0.00107516	0.00193259	0.00336762	0.00608576	0.00605772	0.0204641	0.0458042	0.0214289	0.0196215	0.00759249	0.00209732	0.00351403	0.0240652	0.063989	0.0289694	0.0418056	0.00515162	0.00547917	0.00815141	0.00642906	0.00870853	0.00242265	0.0364974	0.0609941	0.0239418	0.00713195	0.00537116	0.0181321	0.0338335
Bacteria	Firmicutes	Clostridia	Clostridiales	Lachnospiraceae	Shuttleworthia	0	0.001902	0	0	0	0	0	0	0	0.00233431	0.00510958	0	0	0	0	0	0.00400212	0.00568562	0.00411859	0	0	0	0	0	0	0	0.00169157	0.00499099	0	0	0	0
Bacteria	Firmicutes	Clostridia	Clostridiales	Lachnospiraceae	Lachnospiraceae_UCG-008	0	0.00113201	0	0	0	0	0	0	0	0	0	0	0.00111306	0	0	0	0	0	0	0	0	0	0	0	0	0	0	0	0.00145932	0	0	0
Bacteria	Firmicutes	Clostridia	Clostridiales	Lachnospiraceae	probable_genus_10	0.002696	0	0	0.00300865	0.0053732	0	0	0	0	0	0	0	0.00176904	0	0.00180883	0	0	0.00270616	0.0017645	0	0	0.00242142	0.00221692	0	0.00291018	0	0	0	0.00360572	0.00189373	0.00244034	0
Bacteria	Firmicutes	Clostridia	Clostridiales	Unknown_Family	Unknown_Genus	0	0	0	0	0	0	0	0	0	0	0	0	0	0	0	0	0	0	0	0	0	0	0	0	0	0	0	0	0	0	0	0
Bacteria	Firmicutes	Clostridia	Clostridiales	Lachnospiraceae	Lachnospiraceae_ND3007_group	0	0	0	0	0	0	0	0	0	0	0	0	0	0	0	0	0	0	0	0	0	0	0	0	0	0	0	0	0	0	0	0
Bacteria	Firmicutes	Clostridia	Clostridiales	Lachnospiraceae	Lachnospiraceae_AC2044_group	0.00109775	0.00110902	0.00111223	0.00393021	0.00711546	0.00461427	0.00706039	0.00168507	0.00149035	0.00114026	0.00187699	0	0.00750785	0.00882991	0.00337271	0.00145257	0	0	0	0.0145599	0.00195501	0.00368142	0.0042633	0.00574597	0.00537784	0.00124383	0.00108949	0	0.00281644	0.00140773	0.00152521	0
Bacteria	Firmicutes	Clostridia	Clostridiales	Ruminococcaceae	Ruminococcaceae_UCG-014	0	0.00151701	0.00127112	0.0230573	0	0	0	0	0.00350066	0.0106389	0	0.00202118	0	0	0	0.0227084	0.00219892	0.00319381	0.00307711	0.00258638	0	0	0	0	0.00201013	0	0	0.00339653	0	0	0	0.00192492
Bacteria	Tenericutes	NA	Unknown_Order	Unknown_Family	Unknown_Genus	0	0	0	0	0	0	0	0	0	0	0	0	0	0	0	0	0	0	0	0	0	0	0	0	0	0	0	0	0	0	0	0
Bacteria	Firmicutes	Clostridia	Clostridiales	Ruminococcaceae	Ruminiclostridium_6	0	0	0	0	0.0109953	0	0	0.0129686	0	0	0.00418846	0.00251753	0	0.0040889	0	0.00116122	0	0	0	0	0.00120902	0	0	0	0.00693043	0	0	0	0	0.00244677	0.00389377	0.00125402
Bacteria	Firmicutes	Clostridia	Clostridiales	Ruminococcaceae	Ruminococcus_2	0	0	0	0	0	0	0	0	0	0	0	0	0	0	0	0	0	0	0	0	0	0	0	0	0	0	0	0	0	0	0	0
Bacteria	Firmicutes	Clostridia	Clostridiales	Ruminococcaceae	uncultured	0	0	0	0	0	0	0	0.00132957	0	0	0	0	0	0.00118085	0	0	0	0	0	0.0012051	0	0	0	0	0	0.00198318	0.00125004	0	0	0	0	0
Bacteria	Firmicutes	Clostridia	Clostridiales	Ruminococcaceae	Ruminococcus_1	0.0321332	0.0241629	0.0245447	0.0306647	0.0401599	0.02961	0.0635802	0.0668695	0.0435844	0.0310345	0.0198126	0.042959	0.0418476	0.0623204	0.0261809	0.0386034	0.0345442	0.0265043	0.0260112	0.0724751	0.0514412	0.0417127	0.0667121	0.0589934	0.0595837	0.0177268	0.051613	0.0221729	0.0780994	0.0631552	0.0233268	0.0203151
Bacteria	Firmicutes	Clostridia	Clostridiales	Clostridiaceae_1	Clostridium_sensu_stricto_1	0	0	0	0	0	0	0	0	0	0	0	0	0	0	0	0	0	0	0	0	0	0	0	0	0	0	0	0	0	0	0	0
Bacteria	Firmicutes	Clostridia	Clostridiales	Lachnospiraceae	Tyzzerella_3	0	0	0	0	0	0	0	0	0	0	0	0	0	0	0	0	0	0	0	0	0	0	0	0	0	0	0	0	0	0	0	0
Bacteria	Firmicutes	Clostridia	Clostridiales	Lachnospiraceae	[Eubacterium]_hallii_group	0	0	0.00119546	0	0	0	0	0	0	0	0	0	0	0	0	0	0	0	0	0	0	0	0	0	0	0	0.000963336	0	0	0	0	0
Bacteria	Firmicutes	Clostridia	Clostridiales	Ruminococcaceae	Ruminococcaceae_NK4A214_group	0.00388207	0.00535549	0.00438839	0.00346943	0.00436298	0.00492802	0.00401294	0.00450774	0.00314298	0.00309807	0.00248527	0.00408707	0.00637363	0.00440614	0.00298645	0.00341291	0.00382675	0.00356892	0.00277585	0.00540533	0.00352416	0.00388713	0.00380286	0.00309365	0.00513032	0.00237459	0.0045013	0.00335501	0.0038726	0.0034104	0.00307734	0.00238264
Bacteria	Firmicutes	Negativicutes	Selenomonadales	Veillonellaceae	Selenomonas_1	0.00304929	0.00425796	0.00596972	0.00169857	0	0.00220046	0.00191267	0	0.00317278	0.0164155	0.00446654	0.00368462	0.00251813	0.00403603	0.00162041	0.00325059	0.0134228	0.0109908	0.0147486	0.00134605	0.00230871	0.00529713	0	0.00708743	0	0.0102551	0.0154879	0.0157038	0.00336723	0.0012569	0.00400144	0.0169481
Bacteria	Firmicutes	Negativicutes	Selenomonadales	Veillonellaceae	Anaerovibrio	0.00152254	0	0	0	0	0	0.00269055	0	0.00242099	0.00194705	0.00149464	0	0.00149395	0.00149809	0.00160157	0.0015483	0	0	0.00145463	0.00159975	0.00137622	0.00148714	0.00144952	0.00184832	0	0	0	0.00165259	0.00170349	0.00217863	0	0
Bacteria	Firmicutes	Clostridia	Clostridiales	Ruminococcaceae	Ethanoligenens	0	0	0	0	0	0	0	0	0	0	0	0	0	0	0	0	0	0	0	0	0	0	0	0	0	0	0	0	0	0	0	0
Bacteria	Firmicutes	Clostridia	Clostridiales	Ruminococcaceae	[Eubacterium]_coprostanoligenes_group	0	0	0	0	0	0.0017361	0	0	0	0	0	0	0.00101995	0	0	0	0	0	0	0	0	0	0	0	0.00184512	0	0	0	0	0	0	0
Bacteria	Firmicutes	Clostridia	Clostridiales	Ruminococcaceae	Ruminococcaceae_UCG-010	0	0	0	0	0	0	0	0	0	0	0	0	0	0	0	0	0	0	0	0	0	0	0	0	0	0	0	0	0	0	0	0
Bacteria	Firmicutes	Clostridia	Clostridiales	Clostridiaceae_1	Clostridium_sensu_stricto_15	0	0	0	0	0	0	0	0.00171351	0	0	0	0	0	0	0	0	0	0	0	0	0	0	0	0	0	0	0	0	0	0	0	0
Bacteria	Firmicutes	Clostridia	Clostridiales	Ruminococcaceae	Ruminococcaceae_UCG-002	0	0	0.00137326	0	0	0.00115043	0	0.00388206	0	0	0	0	0	0.00109272	0.0019313	0	0	0	0.0015364	0	0.00129262	0.00135857	0.00158595	0.00149876	0.00146259	0.00136561	0	0	0.00310035	0.00344391	0	0
Bacteria	Firmicutes	Clostridia	Clostridiales	Ruminococcaceae	Ruminococcaceae_UCG-013	0	0	0	0	0	0	0	0	0	0	0	0	0	0	0	0	0	0	0	0	0	0	0	0	0	0	0	0	0	0	0	0
Bacteria	Firmicutes	Clostridia	Clostridiales	Ruminococcaceae	Unknown_Genus	0	0	0	0	0	0	0	0	0	0	0	0	0	0.00112797	0	0	0	0	0	0	0	0	0	0	0.000990062	0	0	0	0	0	0	0
Bacteria	Firmicutes	Clostridia	Clostridiales	Ruminococcaceae	Ruminiclostridium_1	0	0	0	0	0	0	0	0	0	0	0	0	0	0	0	0	0	0	0	0	0	0	0	0	0	0	0	0	0	0	0	0
Bacteria	Firmicutes	Clostridia	Clostridiales	Ruminococcaceae	Saccharofermentans	0	0	0	0	0	0	0	0	0	0	0	0	0	0	0	0	0	0.00111462	0	0	0	0	0	0.00120163	0	0	0	0	0	0	0	0.00137942
Bacteria	Firmicutes	Clostridia	Clostridiales	Ruminococcaceae	Ruminococcaceae_UCG-005	0	0	0	0	0	0	0	0	0	0	0	0	0	0	0	0	0	0	0	0	0	0	0	0	0	0	0	0	0	0	0	0
Bacteria	Firmicutes	Clostridia	Clostridiales	Ruminococcaceae	Ruminococcaceae_UCG-004	0	0.00163768	0.00158512	0	0.00209364	0.00161479	0.0014917	0.0024885	0	0	0	0.00132807	0.00240387	0.00176246	0.00126241	0	0.00150192	0	0.00142451	0.00150109	0.00160131	0.00144428	0.00150068	0.00117978	0.00188262	0	0.00268358	0	0.00215208	0.00179318	0.0013996	0
Bacteria	Firmicutes	Erysipelotrichia	Erysipelotrichales	Erysipelotrichaceae	Erysipelotrichaceae_UCG-004	0.00102625	0	0	0.00205094	0.00155193	0.00261043	0	0	0	0.00146298	0	0.00108661	0.00137545	0	0	0.00110295	0	0.00118964	0	0	0	0	0	0	0.00228014	0.00131342	0	0	0	0	0.00337341	0.00142958
Bacteria	Firmicutes	Negativicutes	Selenomonadales	Veillonellaceae	Veillonellaceae_UCG-001	0.00672106	0.00760802	0.00250819	0.00329777	0.00172762	0.00965525	0.00268597	0.00203346	0.00343773	0.00254946	0.00286762	0.00423911	0.00504473	0.00593948	0.00321256	0.00303	0.00669119	0.0047532	0.00324925	0.00416499	0.00526052	0.00500999	0.00177353	0.0104651	0.0048828	0.0042447	0.00596924	0.00725811	0.00105616	0.0023546	0.00607393	0.00179952
Bacteria	Firmicutes	Clostridia	Halanaerobiales	ODP1230B8.23	uncultured_bacterium	0	0	0	0	0.00131768	0	0	0.00123003	0	0.00129086	0	0	0	0	0	0	0	0	0.00128249	0.00206488	0	0	0	0	0.00145509	0.00108727	0.00107802	0	0	0	0	0
Bacteria	Firmicutes	Negativicutes	Selenomonadales	Acidaminococcaceae	Acidaminococcus	0	0	0	0	0	0	0	0	0	0	0	0	0	0	0	0	0	0.00159155	0	0	0	0	0	0	0	0.00579297	0	0.00272387	0	0	0	0.00599422
Bacteria	Firmicutes	Negativicutes	Selenomonadales	Acidaminococcaceae	Succiniclasticum	0.0118313	0.0119637	0.0127679	0.0140042	0.0113906	0.0192728	0.00911491	0.00901548	0.00869701	0.0102193	0.00938494	0.00752576	0.01287	0.0117556	0.0125582	0.0115623	0.0131665	0.0111998	0.0113014	0.0257229	0.0094535	0.0133371	0.00779332	0.0185444	0.0188937	0.0184488	0.0149833	0.017838	0.00750671	0.00786821	0.0148304	0.00908538
Bacteria	Cyanobacteria	Melainabacteria	Gastranaerophilales	Unknown_Family	Unknown_Genus	0	0	0	0	0	0	0	0	0	0	0	0	0	0	0	0	0	0	0	0	0	0	0	0	0	0	0	0	0	0	0	0
Bacteria	Cyanobacteria	Melainabacteria	Gastranaerophilales	uncultured_rumen_bacterium	Unknown_Genus	0.00123654	0.00168939	0	0	0	0	0	0	0	0	0	0.00101953	0	0	0	0	0	0	0	0	0	0	0	0	0	0.00548853	0	0.00264082	0	0	0	0
Bacteria	Armatimonadetes	uncultured	uncultured_organism	Unknown_Family	Unknown_Genus	0	0	0	0	0.00194723	0	0	0	0	0	0	0	0	0.00111035	0.00132836	0	0	0	0	0.00152928	0	0	0	0	0	0	0	0	0	0	0	0
Bacteria	Armatimonadetes	uncultured	uncultured_bacterium	Unknown_Family	Unknown_Genus	0	0	0	0	0	0	0	0	0	0	0	0	0	0.00172721	0	0	0	0	0	0	0	0	0	0	0	0	0	0	0	0	0	0
Bacteria	Actinobacteria	Coriobacteriia	Coriobacteriales	Coriobacteriaceae	Olsenella	0.00224596	0.0018388	0.00638586	0.00130104	0.00111271	0	0.00380246	0.00147888	0.00246073	0.00479771	0.00905473	0.0054375	0.00135852	0	0	0.00480721	0.00255416	0.00744329	0.00417884	0.00162089	0.00383928	0.00101143	0.00334243	0.00229839	0	0.00274861	0.00698419	0.00415224	0.00126626	0.00107256	0.00284407	0.0104648
Bacteria	Actinobacteria	Coriobacteriia	Coriobacteriales	Coriobacteriaceae	Senegalimassilia	0	0	0	0	0.00169834	0	0	0.00138645	0	0	0	0	0.00153204	0.00146284	0	0	0	0	0	0.00107825	0	0	0.00133015	0.00124969	0.00228014	0	0	0	0	0.00134907	0	0
Bacteria	Actinobacteria	Coriobacteriia	Coriobacteriales	Coriobacteriaceae	Denitrobacterium	0	0.00116649	0.00193316	0	0	0	0.00107073	0	0.00129495	0.00114026	0	0	0	0.0010751	0	0.001515	0.00151991	0.00127538	0.00132983	0.00107825	0.0012476	0.000968569	0	0.00322473	0	0.00146129	0.00241981	0.00142837	0	0.00121501	0.00175848	0.00147347
Bacteria	Lentisphaerae	Lentisphaeria	Victivallales	vadinBE97	uncultured_rumen_bacterium	0	0	0	0	0	0	0	0	0	0	0	0	0	0	0	0	0	0	0	0	0	0	0	0	0	0	0	0	0	0	0	0
Bacteria	Lentisphaerae	Lentisphaeria	Victivallales	vadinBE97	Unknown_Genus	0	0	0	0	0	0	0	0	0	0	0	0	0	0	0	0	0	0	0	0	0	0	0	0	0	0	0	0	0	0	0	0
Bacteria	Proteobacteria	Gammaproteobacteria	Oceanospirillales	Halomonadaceae	Halomonas	0	0	0	0	0	0	0	0	0	0	0	0	0	0	0	0	0	0	0	0	0	0	0	0	0	0	0	0	0	0	0	0
Bacteria	Proteobacteria	Deltaproteobacteria	Desulfovibrionales	Desulfovibrionaceae	Desulfovibrio	0	0	0.00100252	0	0	0	0	0.00112338	0.00109292	0	0	0	0	0	0	0.000928146	0	0	0	0	0	0	0	0	0.00104257	0	0.00185786	0	0	0	0	0
Bacteria	Verrucomicrobia	OPB35_soil_group	Unknown_Order	Unknown_Family	Unknown_Genus	0.00641824	0.00425221	0.00259898	0.00533064	0.00243038	0.0082329	0.00118055	0.0015642	0.00191096	0	0.0015294	0.0016545	0.00713119	0.00333104	0.00160157	0.00163154	0.00294089	0.00128074	0.00124806	0.00365758	0.00173636	0.00674141	0.00175648	0.00423847	0.00366773	0.00314003	0.00282693	0.00283183	0.0028789	0.00150828	0.00333752	0.00107219
Bacteria	Verrucomicrobia	WCHB1-41	uncultured_rumen_bacterium	Unknown_Family	Unknown_Genus	0.00640141	0.00666563	0.00657123	0.00206901	0.00411408	0.00683983	0.00186691	0.00305019	0.00246073	0.0032164	0.00123395	0.0036891	0.00718621	0.00442376	0.00355171	0.00270952	0.005558	0.00394939	0.00796175	0.00317836	0.00920912	0.00376713	0.00184175	0.00261737	0.00711794	0.00534936	0.00595204	0.00628649	0.00170917	0.00174291	0.00539207	0.00220081
Bacteria	Elusimicrobia	Elusimicrobia	Elusimicrobiales	Elusimicrobiaceae	Elusimicrobium	0	0	0	0	0	0	0	0	0	0	0	0	0	0	0	0	0	0	0	0	0	0	0	0	0	0	0	0	0	0	0	0
Bacteria	Synergistetes	Synergistia	Synergistales	Synergistaceae	Pyramidobacter	0.0143296	0.00745287	0.00719544	0.00418319	0.0030453	0.00724144	0.00544973	0.00496278	0.00775643	0.00573359	0.00550931	0.00514238	0.008185	0.00768431	0.00333503	0.00577282	0.00558498	0.00556773	0.00512134	0.0103949	0.00525409	0.00965997	0.0042633	0.00657182	0.00554285	0.0100725	0.00793032	0.0103225	0.00454832	0.00527899	0.0102817	0.00473393
Bacteria	Synergistetes	Synergistia	Synergistales	Synergistaceae	Fretibacterium	0	0	0	0	0	0	0	0	0	0	0	0	0	0	0	0	0	0	0	0	0	0.00152571	0	0	0	0	0	0	0	0	0	0
Bacteria	Firmicutes	Clostridia	Clostridiales	Ruminococcaceae	Candidatus_Soleaferrea	0	0	0	0	0	0	0	0	0	0	0	0	0	0	0	0	0	0	0	0	0	0	0	0	0	0	0	0	0	0	0	0
Bacteria	Actinobacteria	Actinobacteria	Bifidobacteriales	Bifidobacteriaceae	Bifidobacterium	0	0	0	0	0	0	0	0	0	0	0	0	0	0	0	0	0	0	0	0	0	0	0	0	0	0	0	0	0	0	0	0
Bacteria	Actinobacteria	Coriobacteriia	Coriobacteriales	Coriobacteriaceae	Atopobium	0	0	0	0	0	0	0	0	0	0	0	0	0	0	0	0	0	0	0	0	0	0	0	0	0	0	0	0	0	0	0	0
Bacteria	Firmicutes	Clostridia	Clostridiales	Ruminococcaceae	Ruminococcaceae_UCG-012	0	0	0	0	0	0	0	0	0	0	0	0	0	0	0	0	0.00108822	0	0	0	0	0	0	0	0	0	0	0	0	0	0	0
Bacteria	Firmicutes	Clostridia	Clostridiales	Clostridiales_vadinBB60_group	uncultured_Clostridiales_bacterium	0	0	0	0	0	0	0	0	0	0	0	0	0	0	0	0	0	0	0	0	0	0	0	0	0	0	0	0	0	0	0	0
Bacteria	Firmicutes	Clostridia	Clostridiales	Clostridiales_vadinBB60_group	Unknown_Genus	0	0	0	0	0	0	0	0	0	0	0	0	0	0	0	0	0	0.0012593	0	0	0	0	0	0	0	0	0	0	0	0	0	0
Bacteria	Elusimicrobia	Elusimicrobia	Elusimicrobiales	Elusimicrobiaceae	Unknown_Genus	0	0	0	0	0	0	0	0	0	0	0	0	0	0	0	0	0	0	0	0	0	0	0	0	0	0	0	0	0	0	0	0
Bacteria	Firmicutes	Negativicutes	Selenomonadales	Veillonellaceae	Allisonella	0	0	0	0	0	0	0	0	0	0	0	0	0	0	0	0	0	0	0	0	0	0	0	0	0	0	0.000992007	0	0	0	0	0
Bacteria	Firmicutes	Negativicutes	Selenomonadales	Veillonellaceae	Schwartzia	0.00867261	0.00714832	0.00918535	0.0079056	0.00591491	0.00512883	0.0122219	0.00563112	0.0098396	0.013511	0.0139731	0.00678347	0.00485429	0.00874178	0.00865789	0.0114957	0.00927233	0.0118107	0.009907	0.0132772	0.0112156	0.0104828	0.00782742	0.0181643	0.0104107	0.0144215	0.00978245	0.0174643	0.0048152	0.0128958	0.0157904	0.0107407
Bacteria	Firmicutes	Negativicutes	Selenomonadales	Veillonellaceae	uncultured	0	0	0	0	0	0	0	0	0	0	0	0	0	0	0	0	0	0	0	0	0	0	0	0	0	0	0	0	0	0	0.00102279	0
Bacteria	Tenericutes	Mollicutes	Anaeroplasmatales	Anaeroplasmataceae	Anaeroplasma	0.00159404	0.00112626	0	0	0	0.000983095	0	0	0	0	0	0.00131913	0	0.00199158	0	0	0.00124111	0	0	0	0.0012476	0	0	0	0	0	0	0	0	0	0.001274	0
Bacteria	Spirochaetae	Spirochaetes	Spirochaetales	PL-11B10	Unknown_Genus	0.00471484	0.00222954	0.00334425	0.00181603	0.00180083	0.00175702	0	0.00132957	0.00138105	0	0	0.00382772	0.00336033	0.00188583	0.00179941	0	0.00353446	0.00274903	0.00181614	0.00114167	0.00210935	0.00263999	0.001603	0.00249939	0.00135008	0.00138301	0.00272372	0.00308096	0.00239056	0.00131556	0.00214427	0
Bacteria	Tenericutes	Mollicutes	Mollicutes_RF9	uncultured_Firmicutes_bacterium	Unknown_Genus	0.00132066	0.00105156	0	0.00287312	0	0.00149347	0	0	0	0	0	0.00212402	0.00134583	0.00169196	0	0	0.00133104	0.00155939	0	0	0.00142124	0	0	0	0	0	0	0	0	0	0	0
Bacteria	Firmicutes	Clostridia	Clostridiales	Syntrophomonadaceae	Unknown_Genus	0	0	0	0	0	0	0	0	0	0	0	0	0	0	0	0	0	0	0	0	0	0	0	0	0	0	0	0	0	0	0	0
Bacteria	Firmicutes	Clostridia	Clostridiales	Family_XIII	[Eubacterium]_nodatum_group	0.00493775	0	0.000957122	0	0.00117127	0	0	0.00266625	0	0	0.00981943	0.00525864	0	0	0	0	0	0.00286157	0	0	0.0018907	0	0.00295021	0	0.00197262	0.00343577	0	0.00178546	0	0.00268139	0.0062085	0.0187351
Bacteria	Proteobacteria	Betaproteobacteria	Burkholderiales	Alcaligenaceae	Sutterella	0	0	0	0	0	0	0	0	0	0	0	0	0	0	0	0	0	0	0	0	0	0	0	0	0	0	0	0	0	0	0	0
Bacteria	Proteobacteria	Gammaproteobacteria	Xanthomonadales	Xanthomonadaceae	Xanthomonas	0	0	0	0	0	0	0	0	0	0	0	0	0	0	0	0	0	0	0	0	0	0	0	0	0	0	0	0	0	0	0	0
Bacteria	Proteobacteria	Gammaproteobacteria	Aeromonadales	Succinivibrionaceae	Ruminobacter	0.00119869	0.0013676	0	0.00207804	0.00385055	0.00495731	0.00564191	0.00824049	0	0	0	0	0.00676299	0.00905903	0.00455034	0	0	0	0.00133413	0.00177594	0.00488109	0.00927426	0.00399045	0.0117104	0.00416276	0	0	0.00117093	0.0076941	0.00313388	0.00238651	0
Bacteria	Proteobacteria	Gammaproteobacteria	Enterobacteriales	Enterobacteriaceae	Unknown_Genus	0	0	0	0	0	0	0	0	0	0	0	0	0	0	0	0	0	0	0	0	0	0	0	0	0	0	0	0	0	0	0	0
Bacteria	Tenericutes	Mollicutes	Anaeroplasmatales	Anaeroplasmataceae	Unknown_Genus	0	0	0	0	0	0	0	0	0	0	0	0	0	0	0	0	0	0	0	0	0	0	0	0	0	0	0	0	0	0	0	0
Bacteria	Tenericutes	Mollicutes	NB1-n	uncultured_bacterium	Unknown_Genus	0	0	0	0.00176182	0	0	0	0	0	0	0	0	0.00103265	0.00137472	0	0	0	0	0	0	0	0	0	0	0.00168761	0	0	0	0	0	0.00110354	0
Bacteria	Tenericutes	Mollicutes	Mollicutes_RF9	uncultured_bacterium	Unknown_Genus	0	0	0	0	0	0	0	0	0	0	0	0	0	0	0	0	0	0	0	0	0	0	0	0	0	0	0	0	0	0	0	0
Bacteria	Tenericutes	Mollicutes	Mollicutes_RF9	uncultured_rumen_bacterium	Unknown_Genus	0	0	0	0	0	0	0	0	0	0	0	0	0	0	0	0	0	0	0	0.00115577	0.00125403	0	0	0	0.00227264	0.00334009	0	0	0	0	0	0.0058312
Bacteria	Tenericutes	Mollicutes	Mollicutes_RF9	uncultured_bacterium	Unknown_Genus	0.00136692	0	0.00553845	0	0	0	0	0	0.00267931	0.00372199	0	0.00944856	0	0.004882	0	0	0.00176273	0.00755583	0.00305559	0.00453146	0.00223154	0	0	0.00505558	0	0	0	0.00479999	0	0	0	0
Bacteria	Tenericutes	Mollicutes	Mollicutes_RF9	Unknown_Family	Unknown_Genus	0	0	0	0	0	0	0	0	0	0	0	0	0	0	0	0	0	0	0	0	0	0	0	0	0	0	0	0	0	0	0	0
Bacteria	Firmicutes	Clostridia	Clostridiales	Clostridiales_vadinBB60_group	uncultured_bacterium	0	0	0	0	0	0	0	0	0	0	0	0	0	0	0	0	0	0	0	0	0	0	0	0	0	0	0	0	0	0	0	0
Bacteria	Firmicutes	Negativicutes	Selenomonadales	Veillonellaceae	Megasphaera	0.00300303	0	0	0	0	0	0.00205909	0.00113049	0.00554078	0	0.00234623	0.00216874	0	0.00162146	0	0.00654697	0	0.00454957	0	0	0.00227656	0	0	0	0.0016576	0.004236	0	0.00600414	0	0.00144125	0.00311322	0.00620113
Bacteria	Firmicutes	Clostridia	Clostridiales	Christensenellaceae	Christensenellaceae_R-7_group	0.00723419	0.00575198	0.00876921	0.00163533	0.00882844	0.00612029	0.00319845	0.0129615	0.00578917	0.00723959	0.00504006	0.00722616	0.0119008	0.00253794	0.00425829	0.00688826	0.00683958	0.00827925	0.0109054	0.00818199	0.00360776	0.0102128	0.0079809	0.00153809	0.0113182	0.00912436	0.015098	0.0089107	0.00542846	0.00932622	0.00542796	0.00777493
Bacteria	Firmicutes	Clostridia	Clostridiales	Clostridiaceae_1	Clostridium_sensu_stricto_12	0	0	0	0	0	0	0	0	0	0	0	0	0	0	0	0	0	0	0	0	0	0	0	0	0	0	0	0	0	0	0	0
Bacteria	Firmicutes	Bacilli	Lactobacillales	Streptococcaceae	Streptococcus	0	0	0	0	0	0	0	0	0	0	0	0	0	0	0	0	0	0	0	0	0	0	0	0	0	0	0	0	0	0	0	0
Bacteria	Firmicutes	Bacilli	Lactobacillales	Leuconostocaceae	Weissella	0.00261608	0.00196521	0.00368473	0.00175278	0.00212292	0.00258951	0.00308406	0.00330615	0.00225539	0.00435667	0.00363232	0.00475334	0.00574304	0.00456476	0.0026473	0.00278444	0.00320619	0.00617327	0.00397657	0.00434822	0.0049454	0.00303856	0.00349591	0.00232898	0.00309769	0.0032705	0.00317098	0.00429341	0.00293568	0.0043405	0.0023237	0.00455209
Bacteria	Firmicutes	Bacilli	Lactobacillales	Lactobacillaceae	Lactobacillus	0.00460969	0.00151126	0.00483479	0.00101192	0	0.00331742	0	0	0.00201694	0.00453954	0.00316307	0.00208825	0.00394014	0.00530499	0	0	0	0	0.00209157	0.00286828	0	0	0	0	0.00489781	0.00332269	0.00642797	0	0	0	0	0.0107783
Bacteria	Firmicutes	Clostridia	Clostridiales	Family_XIII	Family_XIII_UCG-001	0	0	0	0	0	0	0	0	0	0	0	0	0	0	0	0	0	0	0	0	0	0	0	0	0	0	0	0	0	0	0	0
Bacteria	Firmicutes	Clostridia	Clostridiales	Family_XIII	[Eubacterium]_saphenum_group	0.0015646	0.00166641	0.00186885	0.00155402	0.00125911	0.00185742	0.001812	0.00203346	0.00131813	0.00122632	0	0.00151141	0.00271705	0.00178008	0	0.00143176	0.00151991	0	0.00133413	0.00224811	0.0017042	0.00199714	0.00122783	0.00183958	0.00181511	0.00112206	0.00167437	0.000963319	0.00262905	0.00160046	0.00141755	0
Bacteria	Firmicutes	Clostridia	Clostridiales	Family_XIII	Mogibacterium	0.00245626	0.00393617	0.0036696	0	0.00183011	0.0029702	0.00450712	0.00516186	0.00338806	0.00385108	0.0030588	0.00292892	0.00437605	0.00264368	0	0.00400393	0.00436636	0.00336529	0.00437681	0.00381967	0.00382642	0.00339428	0.00324011	0.00430839	0.00231765	0.00331399	0.00514353	0.00357923	0.00461646	0.00345229	0.00299659	0.00282155
Bacteria	Firmicutes	Clostridia	Clostridiales	Family_XIII	Family_XIII_AD3011_group	0.00500084	0.00622892	0.00799368	0.00758938	0.0118152	0.0146837	0.00970976	0.0118239	0.00545798	0.00584116	0.00410157	0.0062424	0.0162515	0.00955251	0.00595406	0.00711301	0.00260363	0.00281334	0.00513856	0.012939	0.0104053	0.00908569	0.0111528	0.0081536	0.0148584	0.00172223	0.00366412	0.00474185	0.00873323	0.00760845	0.00391172	0.00168039
Bacteria	Firmicutes	Clostridia	Clostridiales	Family_XIII	Anaerovorax	0	0	0	0	0	0	0	0	0	0	0	0	0	0	0	0	0	0	0	0	0	0	0	0	0	0	0	0	0	0	0	0
Bacteria	Firmicutes	Clostridia	Clostridiales	Family_XIII	Unknown_Genus	0	0	0	0	0	0	0	0	0	0	0	0	0	0	0	0	0	0	0	0	0	0	0	0	0	0	0	0	0	0	0	0
Bacteria	Firmicutes	Clostridia	Clostridiales	Family_XIII	Family_XIII_UCG-002	0	0	0	0	0	0	0	0	0	0	0	0	0	0	0	0	0	0	0	0	0	0	0	0	0	0	0	0	0	0	0	0
Bacteria	Firmicutes	Erysipelotrichia	Erysipelotrichales	Erysipelotrichaceae	Erysipelotrichaceae_UCG-007	0	0	0	0	0	0	0	0	0	0	0.00137298	0.00127889	0	0	0	0	0	0.00226675	0	0	0	0	0	0	0	0	0	0	0	0	0	0.00383103
Bacteria	Firmicutes	Erysipelotrichia	Erysipelotrichales	Erysipelotrichaceae	Erysipelotrichaceae_UCG-006	0	0	0	0	0	0	0	0	0	0	0	0	0	0	0	0	0	0	0	0	0	0	0	0	0	0	0	0	0	0	0	0
Bacteria	Firmicutes	Erysipelotrichia	Erysipelotrichales	Erysipelotrichaceae	Erysipelotrichaceae_UCG-009	0	0	0	0	0	0	0	0	0	0	0	0	0	0	0	0	0	0	0	0	0	0	0	0	0	0	0	0	0	0	0	0
Bacteria	Firmicutes	Erysipelotrichia	Erysipelotrichales	Erysipelotrichaceae	uncultured	0	0.00109753	0	0	0	0	0	0	0	0	0	0	0	0	0	0	0	0	0	0	0	0	0	0	0	0	0	0	0	0	0	0

## Sheet: Unassigned_OTUs
Supplementary Table S2.
e) Unassigned OTUs (%) of total OTUs at given taxonomic level
Domain	0
Phylum	0
Class	0.00305188
Order	0.00813835
Family	0.0457782
Genus	0.163784
f) Unassigned OTUs (%) within the phyla
Phylum	Actinobacteria	Armatimonadetes	Bacteroidetes	Chloroflexi	Cyanobacteria	Elusimicrobia	Euryarchaeota	Fibrobacteres	Firmicutes	Lentisphaerae	Planctomycetes	Proteobacteria	Spirochaetae	SR1_(Absconditabacteria)	Synergistetes	Tenericutes	Verrucomicrobia
Class	0	0	0	0	0	0	0	0	0	0	0	0	0	0	0	0.115385	0
Order	0	0	0.00480769	0	0	0	0	0	0	0	0	0	0	1	0	0.115385	0.0416667
Family	0	0	0.0144231	0	0.333333	0.25	0	0	0.00286533	0	0	0	0	1	0	0.307692	0.958333
Genus	0	1	0.237981	0	0.333333	0.5	0	0	0.0859599	0.416667	0	0.0666667	0.0897436	1	0	0.461538	1
